# Supplementary material for: Using smartphone-based virtual patients to assess the quality of primary healthcare in rural China: protocol for a prospective multicentre study
Source: PubMed Central journal article supplement — BMJ Open. 2018 Jul 11;8(7):e020943. doi: 10.1136/bmjopen-2017-020943 (PMC6089284; doi:10.1136/bmjopen-2017-020943), 2018-07-11

# BMJ Open

BMJ Open is committed to open peer review. As part of this commitment we make the peer review history of every article we publish publicly available.

When an article is published we post the peer reviewers' comments and the authors' responses online. We also post the versions of the paper that were used during peer review. These are the versions that the peer review comments apply to.

The versions of the paper that follow are the versions that were submitted during the peer review process. They are not the versions of record or the final published versions. They should not be cited or distributed as the published version of this manuscript.

BMJ Open is an open access journal and the full, final, typeset and author-corrected version of record of the manuscript is available on our site with no access controls, subscription charges or pay-per-view fees (<http://bmjopen.bmj.com>).

If you have any questions on BMJ Open's open peer review process please email [info.bmjopen@bmj.com](mailto:info.bmjopen@bmj.com)

# BMJ Open

## Development and validation of smartphone-based virtual patients to assess the quality of primary health care in rural areas: a study protocol

|                               |                                                                                                                                                                                                                                                                                                                                                                                                                                                                                                                                                                                                                                                                                                                                                                                                                                                                                                                                                                                                                                                                                                                                                                                                                                                                                                                                                                                                                                                                                                                                                                                                                                                                                                                             |
|-------------------------------|-----------------------------------------------------------------------------------------------------------------------------------------------------------------------------------------------------------------------------------------------------------------------------------------------------------------------------------------------------------------------------------------------------------------------------------------------------------------------------------------------------------------------------------------------------------------------------------------------------------------------------------------------------------------------------------------------------------------------------------------------------------------------------------------------------------------------------------------------------------------------------------------------------------------------------------------------------------------------------------------------------------------------------------------------------------------------------------------------------------------------------------------------------------------------------------------------------------------------------------------------------------------------------------------------------------------------------------------------------------------------------------------------------------------------------------------------------------------------------------------------------------------------------------------------------------------------------------------------------------------------------------------------------------------------------------------------------------------------------|
| Journal:                      | <i>BMJ Open</i>                                                                                                                                                                                                                                                                                                                                                                                                                                                                                                                                                                                                                                                                                                                                                                                                                                                                                                                                                                                                                                                                                                                                                                                                                                                                                                                                                                                                                                                                                                                                                                                                                                                                                                             |
| Manuscript ID                 | bmjopen-2017-020943                                                                                                                                                                                                                                                                                                                                                                                                                                                                                                                                                                                                                                                                                                                                                                                                                                                                                                                                                                                                                                                                                                                                                                                                                                                                                                                                                                                                                                                                                                                                                                                                                                                                                                         |
| Article Type:                 | Protocol                                                                                                                                                                                                                                                                                                                                                                                                                                                                                                                                                                                                                                                                                                                                                                                                                                                                                                                                                                                                                                                                                                                                                                                                                                                                                                                                                                                                                                                                                                                                                                                                                                                                                                                    |
| Date Submitted by the Author: | 08-Dec-2017                                                                                                                                                                                                                                                                                                                                                                                                                                                                                                                                                                                                                                                                                                                                                                                                                                                                                                                                                                                                                                                                                                                                                                                                                                                                                                                                                                                                                                                                                                                                                                                                                                                                                                                 |
| Complete List of Authors:     | <p>Liao, Jing; Sun Yat-sen University, Department of Epidemiology and Biostatistics, School of Public Health; Sun Yat-sen University, Sun Yat-sen Global Health Institute, Institute of State Governance</p> <p>Chen, Yao-Long; Lanzhou University, Evidence-Based Medicine Center, School of Basic Medical Sciences</p> <p>Cai, Yiyuan; Sun Yat-sen University, Department of Epidemiology and Biostatistics, School of Public Health; Guizhou Medical University, School of Public Health</p> <p>Zhang, Nan; Inner Mongolia Medical University, Department of Health Management, School of Health Management</p> <p>Sylvia, Sean ; University of North Carolina at Chapel Hill, Department of Health Policy and Management, Gillings School of Global Public Health</p> <p>Wang, Hong; Bill &amp; Melinda Gates Foundation, Health Economics, Financing &amp; Systems</p> <p>Wasserheit, Judith; University of Washington, Departments of Global Health, Medicine, and Epidemiology, Schools of Medicine and Public Health</p> <p>Gong, Wenjie; Central South University, School of Public Health; University of Rochester Medical Center, Department of Psychi</p> <p>Zhou, Zhongliang; Xi'an Jiaotong University,</p> <p>Pan, Jay; Sichuan University, West China School of Public Health</p> <p>Wang, Xioahui; Lanzhou University, School of Public Health</p> <p>Tang, Chengxiang; Guangzhou University, School of Public Administration</p> <p>Zhou, Wei; Xiangya Hospital Central South University,</p> <p>Xu, Dong; Sun Yat-sen University , Sun Yat-sen Global Health Institute, Institute of State Governance; Sun Yat-sen University, Department of Epidemiology and Biostatistics, School of Public Health</p> |
| Keywords:                     | Quality in health care < HEALTH SERVICES ADMINISTRATION & MANAGEMENT, PRIMARY CARE, quality assessment tool                                                                                                                                                                                                                                                                                                                                                                                                                                                                                                                                                                                                                                                                                                                                                                                                                                                                                                                                                                                                                                                                                                                                                                                                                                                                                                                                                                                                                                                                                                                                                                                                                 |
|                               |                                                                                                                                                                                                                                                                                                                                                                                                                                                                                                                                                                                                                                                                                                                                                                                                                                                                                                                                                                                                                                                                                                                                                                                                                                                                                                                                                                                                                                                                                                                                                                                                                                                                                                                             |

SCHOLARONE™  
Manuscripts

**Development and validation of smartphone-based virtual patients to assess the quality of primary health care in rural areas: a study protocol**

Jing Liao<sup>1,2</sup>, Yaolong Chen<sup>3</sup>, Yiyuan Cai<sup>4</sup>, Nan Zhan<sup>5</sup>, Sean Sylvia<sup>6</sup>, Hong Wang<sup>7</sup>, Judith N Wasserheit<sup>8</sup>, Wenjie Gong<sup>9</sup>, Zhongliang Zhou<sup>10</sup>, Jay Pan<sup>11</sup>, Xiaohui Wang<sup>12</sup>, Chenxiang Tang<sup>13</sup>, Wei Zhou<sup>14</sup>, Dong Xu<sup>1,2</sup>\*

<sup>1</sup> Department of Epidemiology and Biostatistics, School of Public Health, Sun Yat-sen University, No.74 Zhongshan 2nd Road, Guangzhou, P.R. China, 510080

<sup>2</sup> Sun Yat-sen Global Health Institute, Institute of State Governance, Sun Yat-sen University, No.135 Xingang West Road, P.R. China, 510275

<sup>3</sup> Evidence Based Medicine Center, School of Basic Medical Sciences, Lanzhou University, No. 199 Donggang West Rd, Lanzhou City, Gansu Province, 730000 China

<sup>4</sup> School of Public Health, Guizhou Medical University, UniverCity of Guan New Area, Guizhou, China, 550025

<sup>5</sup> Department of Health Management, School of Health Management, Inner Mongolia Medical University, Jinshan Development Zone, Hohhot, Inner Mongolia, P.R. China, 010110

<sup>6</sup> Department of Health Policy and Management, Gillings School of Global Public Health, University of North Carolina at Chapel Hill, CB#7411, Chapel Hill, NC 27599, USA

<sup>7</sup> Health Economics, Financing & Systems, PO Box 23350, Seattle WA, 98102, USA

<sup>8</sup> Departments of Global Health, Medicine, and Epidemiology, Schools of Medicine and Public Health, University of Washington, 1705 NE Pacific Street, Box 357965 Seattle, Washington, 98195-7965, United States

<sup>9</sup> Xiangya school of public health, Central South University, Xiangya school of public health, Central South University, China

<sup>10</sup> School of Public Policy and Administration, Xi'an Jiaotong University, No. 28 Xianning West Road, Xi'an, Shaanxi, 710049, China.

<sup>11</sup> West China School of Public Health, Sichuan University, N.o. 17, Ren Min Nan Road, Chengdu, China

<sup>12</sup> School of Public Health, Lanzhou University, Lanzhou, Gansu Province, P. R. China, 730000

<sup>13</sup> School of Public Administration, Guangzhou University, Guangzhou, Guangdong, 510320, China.

<sup>14</sup> Hospital Administration Institute, Xinagya Hospital, Central South University, No. 87 Xiangya Road, Changsha, Hunan., China

Corresponding author\*: Dong Xu, [xudong5@mail.sysu.edu.cn](mailto:xudong5@mail.sysu.edu.cn), Department of Epidemiology and Biostatistics, School of Public Health, Sun Yat-sen University, No.74 Zhongshan 2nd Road, Guangzhou, P.R. China, 510080

## ABSTRACT

**Introduction:** Valid, low cost and easy-to-implement tools for evaluating care quality are not readily available. While the Unannounced Standardized Patient (USP) is recommended as the gold standard for assessing quality, its use is restricted by the limited range of medical conditions that can be studied and a high implementation cost. Clinical vignettes provide a low-cost alternative; however, their lack of realism have brought their validity into question. Computerized virtual patients (VPs) can create high-fidelity, visualized and interactive simulations of doctor-patient encounters closely replicating clinical complexity that can be easily implemented via smartphone, at low marginal cost. Our study aims to develop and validate smartphone-based VP against USP as a quality assessment tool that can be used for research purposes and routinely applied to evaluate the quality of primary health care provided by primary health centers (PHCs) in rural areas.

**Methods and analysis:** The study will be implemented in outpatient settings of rural PHCs in seven Chinese provinces, and physicians practicing at township health centers and village clinics will be our study population. The development of VPs will involve three steps: (1) identifying 10 VP cases that can best represent rural PHCs' work, (2) designing each case by a case-specific development team, and (3) developing corresponding quality scoring criteria. After being externally reviewed for content validation, these VP cases will be implemented on a smartphone-based platform and will be tested for feasibility and face validity. This smartphone-based VP tool will then be validated for its criterion validity against USP and its reliability (i.e., internal

1  
2  
3 consistency and stability), with 1260 VP/USP-clinician encounters across the seven  
4  
5  
6 study provinces for all 10 VP cases.  
7

8 **Ethics and dissemination:** Sun Yat-sen University: No. 2017-007. Study findings will  
9  
10 be published and the tools developed will be freely available to low- and  
11  
12  
13 middle-income countries for research purposes.  
14

### 15 **Strengths and limitations of this study**

- 16 ● Developing and validating smartphone-based VP as a quality assessment tool  
17 for research and routine use in rural primary health care centers.
- 18 ● Following an evidence-based approach to develop VP cases and scoring  
19 criteria.
- 20 ● Systematically validating the VP assessment tool via a cross-national  
21 multicenter study
- 22 ● The extent to which the VP assessment can reflect practitioners' real clinical  
23 practice needs to be verified.  
24  
25  
26  
27

28 **Key words:** Quality in health care, primary care, care quality assessment tool  
29  
30  
31  
32  
33  
34  
35  
36  
37  
38  
39  
40  
41  
42  
43  
44  
45  
46  
47  
48  
49  
50  
51  
52  
53  
54  
55  
56  
57  
58  
59  
60

## INTRODUCTION

Universal health coverage (UHC) is a paramount goal of health system development for countries at all income levels.<sup>1</sup> The achievement of UHC is not possible without primary health care services,<sup>1</sup> which ensure integrated care close to the population they serve and link to health-related sustainable development goals.<sup>2</sup> However, service coverage alone cannot improve health outcomes if the quality of care is poor. Despite the fact that much attention has been shifted to enhance health care services, a dearth of scientific evidence exists on the quality of primary health care in resource-poor settings, particularly of low- and middle- income countries (LMICs).<sup>3-5</sup>

This scarcity of evidence may partially result from the limited availability of valid, low cost, and easy-to-implement quality assessment tools. As defined by Donabedian's framework for health care quality, quality can be evaluated by the *structure* of care (e.g., staff, equipment), the *process* of care delivery (e.g., doctor-patient interactions), and health *outcomes* (e.g., death or complications).<sup>6</sup> Process measures have been increasingly adopted, considering the benefits of frequent and timely evaluation, and the usefulness in improving practice.<sup>7,8</sup> The 'gold standard' of assessing process is the unannounced standardized patient (USP), namely a trained actor who simulates the symptoms, signs, and emotions of a real patient in a standardized fashion and presents him- or herself unannounced to clinics to assess care quality.<sup>9</sup> USP can reduce recall bias better than patient exit interviews, minimize the Hawthorne effect that inevitably occurs in direct observation, and allow for comparisons between users as case- and patient-mix are controlled.<sup>3,7,10</sup> Nonetheless,

1  
2  
3 the USP can only portray a limited number of conditions without obvious  
4  
5 physiological symptoms and risk of invasive examinations. Also, training and  
6  
7 implementation of USP can require substantial personnel and resources, making USP  
8  
9 impractical for large-scale and routine quality assessment.<sup>11 12</sup>  
10  
11  
12

13 On the other hand, clinical vignettes or case simulations have been widely used  
14  
15 as a low-cost and convenient alternative to assess care quality.<sup>7 13</sup> Vignettes have been  
16  
17 implemented in a paper-and-pencil form,<sup>7</sup> presented by an enumerator,<sup>5</sup> and  
18  
19 streamlined by a computer.<sup>13</sup> The validity of the vignette in assessing the quality of  
20  
21 patient care has gotten mixed reports. Some studies showed that vignettes only reflect  
22  
23 clinicians' competency (know-how) rather than their actual behaviors and can cause  
24  
25 overestimation of clinical performance.<sup>7 14</sup> By contrast, other studies found that  
26  
27 vignette-based results, particularly those streamlined by computer, are quite close to  
28  
29 the USP-based assessment.<sup>13 15</sup> The enumerator-administered vignette is similar to the  
30  
31 announced standardized patient and thus is expensive and difficult to implement.<sup>5</sup> A  
32  
33 computerized vignette can be interactive and can better represent the realistic  
34  
35 complexity of a clinical encounter.<sup>13</sup> As a further improvement on computerized  
36  
37 vignettes,<sup>13</sup> smartphone virtual patients (VPs) create high-fidelity, visualized, and  
38  
39 interactive simulations that replicate clinical complexity and can be easily  
40  
41 implemented at only marginal cost.<sup>16</sup> Although VPs cannot remove the Hawthorne  
42  
43 effect, their advanced features may reduce the measurement gap between competency  
44  
45 and real practice.<sup>8 13</sup> While VPs have been used in medical education to train and test  
46  
47 clinical skills such as clinical reasoning, making diagnoses, and therapeutic  
48  
49  
50  
51  
52  
53  
54  
55  
56  
57  
58  
59  
60

1  
2  
3 decisions,<sup>17</sup> the relative validity of their use as a measure for the quality of care has  
4  
5 yet to be studied. Strengths and limitations of the abovementioned three methods are  
6  
7 compared in Table 1.  
8  
9

10  
11 In the present study, we propose to adapt smartphone-based VP for medical  
12  
13 education as a quality-of-care assessment tool, given its advantages in 1)  
14  
15 **standardization** (VPs are highly standardized, ensuring consistent assessments across  
16  
17 users), 2) **flexibility** (Assessments can be delivered by smartphones for multiple users  
18  
19 at anytime, anywhere, providing the data connectivity is available), 3) **scalability**  
20  
21 (VPs can be modified to demonstrate and assess almost any clinical conditions with  
22  
23 low marginal cost), and 4) **training** (VPs can further be used as a training tool to  
24  
25 improve health care quality and thus to address the ‘so what’ question after quality  
26  
27 assessment). These characteristics may especially benefit quality assessment and  
28  
29 improvement in primary care of rural communities which are geographically scattered  
30  
31 and difficult to reach and manage.  
32  
33  
34  
35  
36  
37

38  
39 Therefore, our study aims to develop and validate **smartphone-based VPs**  
40  
41 against USPs as a quality assessment tool that can not only be used for research  
42  
43 purposes but also routinely applied to evaluate the quality of primary health care  
44  
45 provided by primary health centers (PHCs) in rural areas. To maximize its validity,<sup>13</sup>  
46  
47 we will properly construct high-fidelity VP cases to reflect clinical complexity in rural  
48  
49 PHC contexts with real-time patient-doctor interactions and temporal constraints, as  
50  
51 well as use evidence-based quality care scoring criteria; additionally, we will make  
52  
53 the VP-based test anonymous to minimize the Hawthorne effect. The initial phase of  
54  
55  
56  
57  
58  
59  
60



1  
2  
3 the study will mainly focus on rural China, while the ultimate goal is to develop and  
4  
5  
6 validate tools that can have a broad application in other LMICs.  
7

## 8 **METHODS AND ANALYSIS**

### 9

### 10 **Study setting**

11  
12 The validation study will be implemented in the outpatient setting of rural PHCs (i.e.,  
13  
14 township health centers and village clinics) in seven Chinese provinces (Guizhou,  
15  
16 Sichuan, Gansu, Inner Mongolia, Shaanxi, Hunan, and Guangdong). We are selecting  
17  
18 these provinces not only to reflect the five strata of low-to-high life-expectancies and  
19  
20 various burden-of-disease patterns in China,<sup>18</sup> but also to contrast geographic regions  
21  
22 with ethnic diversities, from southwest mountainous regions, to the northern plateau,  
23  
24 middle inland region, and southeast coastal areas (**Error! Reference source not**  
25  
26 **found.**). Our study targets township health centers and village clinics because they  
27  
28 provide most primary health care in rural China.<sup>19</sup> At township health centers, primary  
29  
30 health care is delivered by a workforce including licensed/unlicensed physicians,  
31  
32 licensed/unlicensed assistant physicians, and registered nurses; while at village clinics,  
33  
34 services are mainly delivered by one full- or part-time ‘village doctor’ who is a  
35  
36 clinician with rudimentary medical training.<sup>19-21</sup> The outpatient setting is chosen due  
37  
38 to the few inpatient cases in township health centers and village clinics.  
39  
40  
41  
42  
43  
44  
45  
46

### 47 **VP case development**

#### 48 *VP case selection*

49  
50 We intend to select 10 cases that can best represent the work of rural PHCs. The  
51  
52 selection of the VP cases will be based on the following criteria: 1) high frequency of  
53  
54  
55  
56  
57

1  
2  
3 clinical encounters in the primary care settings in rural areas, and/or 2) association with  
4 significant disease burden; 3) representation of the major areas of work of PHCs in  
5 rural China overall (e.g., public health service delivery, chronic disease management,  
6 infectious disease control, health education, and patient-centered care); and 4)  
7 suitability with USP methodology (e.g., no obvious physiological signs, low risk for  
8 invasive tests) for the sake of criterion validation in the current study. A case selection  
9 committee will be comprised of stakeholders, including physicians, public health  
10 practitioners, policy-makers, and members of the research team. Based on the literature  
11 review, the research team will prepare a list of the 30 most frequently seen conditions in  
12 township health centers and village clinics reported by either community dwellers<sup>22</sup> or  
13 the rural PHC clinicians (Appendix1) for the committee to rate and select.

### 30 *VP case design*

31  
32 The 10 selected VP cases will then be constructed individually by 10 case-specific  
33 development teams (Figure 2). These teams consist of one *condition expert* in the  
34 relevant specialties of a tertiary teaching hospital who will be responsible for drafting  
35 the VP case; an *evidence-synthesis group* involving epidemiologists and  
36 evidence-based researchers who will search and synthesize evidence of the selected  
37 condition for the condition expert to work on; a *clinical consensus group* which  
38 consists of several condition-related clinical experts who will review the  
39 corresponding case from a scientific perspective; an overall all-condition shared  
40 *context-expert panel*, which includes clinicians and health managers from community  
41 health centers, township health centers, and village clinics, who will review the  
42  
43  
44  
45  
46  
47  
48  
49  
50  
51  
52  
53  
54  
55  
56  
57  
58  
59  
60

1  
2  
3 contextual appropriateness of the cases in the rural PHC setting; and a *case*  
4  
5  
6 *coordinator* who will coordinate development of each case.  
7

8 Each VP case will be structured into five domains—medical history, physical  
9  
10 examination, laboratory and imaging studies, diagnosis, and management and  
11  
12 treatment plan—to simulate real-life clinical scenarios.<sup>10 17</sup> The structured VP cases  
13  
14 will have the ability to evaluate the examinee's performance by each domain and to  
15  
16 aggregate performance scores across conditions. Besides these five condition-related  
17  
18 domains, another practice contextual adjustor will be built into each case to consider  
19  
20 medical resource constraints in rural practices (e.g., availability of basic medical  
21  
22 equipment and medicines).  
23  
24  
25  
26

### 27 28 *Scoring criteria*

29 Corresponding to each VP case, care quality scoring criteria will be developed. These  
30  
31 criteria include *process quality*, the *accuracy of diagnosis*, and the *appropriateness of*  
32  
33 *the treatment and management plan*.<sup>3 4</sup> Process quality will be evaluated in reference  
34  
35 to a clinical process checklist (to be detailed later) including all necessary questions  
36  
37 that should be asked and physical examinations that should be performed by clinicians,  
38  
39 alongside redundant or even potentially harmful practices. Diagnoses will be rated as  
40  
41 correct, partially correct, or incorrect based on predetermined standards. The  
42  
43 treatment & management plan will be considered appropriate if the clinician  
44  
45 prescribes any of the correct medications or refers the patient to an upper level  
46  
47 physician depending on the VP cases.  
48  
49  
50  
51  
52  
53

54 In addition, *cost of care* and *time-spent per encounter* will also be recorded.  
55  
56

1  
2  
3 Patient costs will cover medication fees and clinic fees charged per case. In order to  
4  
5  
6 recode clinicians' reaction time to each domain and to impose temporal constraints as  
7  
8  
9 in real clinical practices, the entire clinician-VP interaction process will be timed. This  
10  
11 will include time spent on taking history, conducting physical examinations,  
12  
13 prescribing drugs and treatments, and any interruptions)

14  
15  
16 As for the development of the aforementioned checklist for the predetermined  
17  
18 standards of correctness regarding appropriateness of the treatment and management  
19  
20 plan, a systematic evidence-based approach will be adopted (Appendix 2). Briefly, the  
21  
22 evidence-synthesis group will systematically search and extract condition-specific  
23  
24 checklist items and standards from clinical guidelines, reputable textbooks, and  
25  
26 systematic reviews, etc., in that order, whereas the quality of the evidence will then be  
27  
28 rated by the Appraisal of Guidelines for Research & Evaluation II (AGREE II)<sup>23</sup> or  
29  
30 the revised Quality Assessment of Diagnostic Accuracy Studies (QUADAS-2)  
31  
32 according to its type.<sup>24</sup> Afterwards, the clinical consensus group and the  
33  
34 contextual-expert panel will review and revise initial standards using a Delphi  
35  
36 process.<sup>25</sup>

### 37 38 39 40 41 42 **VP case external review**

43  
44  
45 To validate the content of VP cases, an independent expert panel of physicians,  
46  
47 general practitioners, and rural PHC clinicians who otherwise are not involved in the  
48  
49 study, will be convened to review the cases for content accuracy and appropriateness.  
50  
51  
52 The content validation involves qualitative and quantitative phases. In the qualitative  
53  
54 phase, the expert panel will be required to evaluate the cases with respect to the  
55  
56  
57  
58  
59  
60

1  
2  
3 following: overarching assessment goal, representativeness of the goal and test items  
4  
5  
6 to each domain, the logical relationship of the content tested, and the appropriate  
7  
8 wording, grammar, understandability, and relatedness to the rural PHC context. The  
9  
10 panel will also mention their suggestions, if any, next to each item. Modified VP cases  
11  
12 will then be given back to the expert panel for quantitative evaluation with respect to  
13  
14 their adjustments for simplicity and clarity, as well as necessity and relevance to the  
15  
16 assessment, using a four-point Likert scale ranging from 1 (the lowest) to 4 (the  
17  
18 highest). The content validity index (CVI) will be computed for each domain and for  
19  
20 the entirety of VP cases.<sup>26</sup>  
21  
22  
23  
24

### 25 **Technical implementation**

26  
27 Revised VP cases will be implemented on *CureFUN*, an existing smartphone- based  
28  
29 training platform using VPs with special customizations and set-ups to suit the  
30  
31 assessment purpose. A live demonstration of a simplified VP can be accessed from  
32  
33 [http://www.curefun.com/zhiqu\\_front/www/experience/experience.html#/caseList](http://www.curefun.com/zhiqu_front/www/experience/experience.html#/caseList) and  
34  
35  
36 is also illustrated in Appendix 3. The smartphone-based VP assessment tool will not  
37  
38 only present interactive clinical scenarios, but also automatically record each  
39  
40 examinee's diagnosis pathway and grade it against the scoring criteria (Figure 33).  
41  
42  
43  
44

### 45 **Feasibility study**

46  
47 Before a full-scale validation study, a feasibility study with 30% of the validation  
48  
49 study sample (see study sample section) will be conducted to test the VP assessment  
50  
51 tool's usability, accessibility, and stability, particularly in remote village clinics with  
52  
53 weak phone connectivity. Selected clinicians will be instructed to individually attempt  
54  
55  
56  
57

1  
2  
3 two random VP cases within a given time, using their own smartphone devices from  
4  
5 their workplace. Clinicians without a smartphone will be given a temporary one  
6  
7 installed with the customized *CureFUN* applications. Clinicians' willingness to  
8  
9 participate and adherence to the VP-based tests (e.g., percentage completing VP cases,  
10  
11 score of the assessment, and number of attempts made at each case per person) will be  
12  
13 automatically recorded. Upon completion of the cases, participants will be asked to  
14  
15 fill in a five-point Likert-scale questionnaire regarding their subjective attitude toward  
16  
17 the simulator VP experience (with 1 being the most negative response and 5 being the  
18  
19 most positive), regarding ease of use, experienced assessment process and outcome,  
20  
21 realism, device competence, accessibility, and other general comments. These results  
22  
23 will be used to determine VP cases' face validity, whereby a satisfying score equals  
24  
25 frequency (%) multiplied by positive evaluations; and scores no less than 1.5 are  
26  
27 considered acceptable.<sup>27</sup>

### 28 29 30 31 32 33 34 35 **Validation of VP as a quality assessment tool**

#### 36 37 38 *Study design*

39  
40 The prospective validation study is a nationwide multicenter study with two main  
41  
42 functions. This study will 1) assess the criterion validity of the VP-tool in assessing  
43  
44 the quality of primary health care, by analyzing its measurement concordance against  
45  
46 the standard USP measure, and 2) test the reliability of the VP tool, by examining its  
47  
48 internal consistency and the stability of repeated VP assessments on the same  
49  
50 examinees.  
51  
52  
53  
54  
55  
56  
57  
58  
59  
60

### *Study sample*

From each of our seven sample provinces, two counties will be selected with sufficient variations in socio-economic conditions, demographics, and disease burdens between them while also approximating the provincial condition in general. Within each county, the government registry of all township health centers and village clinics will serve as our sampling frame, which will include 1) licensed practicing physicians, 2) clinicians who have not been licensed but are providing clinical services under the supervision of licensed physicians at township health centers, as well as 3) full- or part-time village clinicians. Temporarily-visiting clinicians (often senior clinicians sent by higher level medical institutions to support the development of township health centers), nurses, and allied health workers without prescription privileges will be excluded.

The sample size calculation is based on individual VP/USP-clinician encounter, and ensures sufficient power to detect variations at individual case level per county. For village clinics, one VP/USP case will be examined per time to minimize the detection of USPs. Assuming a 5% type I error and 80% power, to determine whether a moderate concordance correlation coefficient<sup>28</sup> of 0.90<sup>29</sup> between VP and USP differs from zero, seven paired VP/USP-clinician encounters will be required for each of the 10 cases per county. As a stratified sampling strategy will be deployed that first samples townships and then villages from each township, the design effect should be taken into consideration when calculating the sample size. Assuming an intra-class correlation of 0.05 and 6 village clinics per township, then 9 paired VP/USP-clinician

1  
2  
3 encounters is needed. These nine paired VP/USP-clinician encounters will be assigned  
4  
5  
6 to 3 township health centers and 6 village clinics using probability proportional to size  
7  
8 (PPS) method. These 9 paired VP/USP-clinician encounters will be assigned to  
9  
10 township health centers and village clinics based on the ratio of the total number of  
11  
12 clinicians at township health centers over the total number of village clinicians for  
13  
14 each county. There are 1260 VP/USP-clinician encounters across our seven study  
15  
16 provinces for all 10 VP cases. Figure 4 shows the sampling process and study flow for  
17  
18 one VP case using Guizhou Province (Danzhai County) as a demonstration.  
19  
20  
21

### 22 23 *Criterion validity*

24  
25 Criterion validity<sup>30</sup> of the VP to assess quality of care will be evaluated mainly by its  
26  
27 measurement concordance against the USP measure as the recognized gold standard<sup>31</sup>  
28  
29 for assessing quality of care in real practice. The USPs will be developed in a related  
30  
31 study, sharing the development teams for VP and a similar development process. The  
32  
33 method of fielding USPs in rural China will follow approaches similar to those of the  
34  
35 previous USP study in rural China.<sup>3</sup> Identical quality scoring criteria, described above,  
36  
37 will be applied to scores. Each selected clinician will first see a USP (to avoid the  
38  
39 practice effect due to the USP's unannounced feature), and then complete a  
40  
41 smartphone-based VP assessment of the same condition. The clinician to be assessed  
42  
43 will be randomly selected onsite by the USP from any on-duty clinicians on the day of  
44  
45 the USP visit to the sampled township health center and village clinics. This situation  
46  
47 would especially apply to township health centers, as most village clinics have only  
48  
49 one clinician (note: Chinese patients normally see their primary care clinicians as a  
50  
51  
52  
53  
54  
55  
56  
57  
58  
59  
60



1  
2  
3 walk-in patient and appointments are seldom needed). To record USP-clinician  
4 interactions, USPs will complete checklists immediately after their visit, as well as  
5  
6 retain the medication prescription and the fee charge slips by the clinician. A week  
7  
8 after the USP clinic visit, clinicians will be assigned a smartphone-based VP  
9  
10 assessment. The VP-clinician interactions, drugs dispensed, and fees charged will all  
11  
12 be recorded automatically by the online assessment system.  
13  
14  
15  
16  
17

18 The concordance of the two assessments between USPs and VPs will then be  
19  
20 analyzed by Lin's concordance correlation coefficient ( $r_c$ )<sup>28</sup> for continuous *process*  
21  
22 *quality scores, fees charged (yuan), and time spent (min)*, and the Kappa statistic<sup>32</sup> for  
23  
24 dichotomous *diagnoses and treatment & management* measures.  $r_c$  evaluates how  
25  
26 close pairs of observation fell on a 45° line (the perfect concordance line) through the  
27  
28 origin in addition to their correlation. Kappa measures agreement in assessment beyond  
29  
30 what is expected by chance alone. In addition, for continuous measures, a  
31  
32 Bland-Altman plot will also be used to visualize the concordance.<sup>33 34</sup> For dichotomous  
33  
34 measures, we will analyze their sensitivity (i.e., strength to detect correct diagnosis,  
35  
36 treatment plan, etc.) and specificity (i.e., strength to detect incorrect diagnosis,  
37  
38 treatment plan, etc.) using USP as the reference.  
39  
40  
41  
42  
43

#### 44 *Reliability*

45  
46 To establish *test-retest reliability*, clinicians previously being assessed by VPs will be  
47  
48 instructed to retake the same VP tests four weeks after their last assessment. The  
49  
50 second VP test is set one month later than the first to reduce the practice effect,<sup>35</sup>  
51  
52 assuming the clinician's general medical knowledge remains constant.<sup>30</sup> The  
53  
54  
55  
56  
57  
58  
59  
60

1  
2  
3  
4 concordance of the two repeated tests indicate the stability of the VP assessment  
5  
6 tool.<sup>30</sup> Similar concordance measures (i.e.,  $r_c$  for continuous and Kappa for  
7  
8 dichotomous measures) as described above will be used. The *internal consistency*, the  
9  
10 intercorrelation of scores for process quality indicators, will be computed by  
11  
12 Cronbach's alpha coefficients ( $\alpha$ ),<sup>36</sup> with  $\alpha > 0.7$  representing acceptable reliability.<sup>37</sup>  
13  
14 Table 2 summarizes the validity, reliability, and feasibility measures that will be  
15  
16 examined in our study.  
17  
18  
19

## 20 **ETHICS AND DISSEMINATION**

21  
22  
23 The study has been approved by the Institutional Review Board of the School of  
24  
25 Public Health (IRB), Sun Yat-sen University (No. 2017-007). Informed consent will  
26  
27 be obtained from all participating clinicians of VP tests. However, to reduce  
28  
29 participation bias due to self-selection,<sup>38</sup> our IRB has approved the implementation of  
30  
31 USP without prior informed consent from the individual participants, on the condition  
32  
33 that involved clinicians will be fully de-identified and all analyses will only be  
34  
35 conducted at the population level.<sup>38</sup> Study data will be securely stored and only  
36  
37 de-identified information will be used for analysis. We will seek peer-reviewed  
38  
39 publications for study findings and produce reports to inform health authorities. The  
40  
41 tools and technology developed in this study will be freely available to other LMICs  
42  
43 for research purposes.  
44  
45  
46  
47  
48  
49

## 50 **DISCUSSION**

51  
52 To the best of our knowledge, this is the first study validating VP as a quality  
53  
54 assessment tool in rural primary health care centers. This study follows an  
55  
56  
57  
58  
59  
60

1  
2  
3  
4 evidence-based approach to develop VP cases and scoring criteria, implements them  
5  
6 on a widely accessible platform (i.e., a smartphone), and systematically validates the  
7  
8 VP assessment tool via a cross-national multicenter study representing rural PHCs  
9  
10 over a wide range of geographic areas with distinct life expectancies and economic  
11  
12 development levels. The VP assessment tool's accessibility, flexibility and scalability  
13  
14 give it good potential to be easily adapted to other LMICs.  
15  
16

17  
18 Nevertheless, it is to be noted that given its simulated nature, the VP-test  
19  
20 theoretically may never completely bridge the 'competency-practice' gap. The  
21  
22 validation study is thus essential to quantify the concordance/discordance between  
23  
24 VP- and USP-based quality assessments. Our study will generate firsthand empirical  
25  
26 evidence contributing to the understanding of the 'know-do gap',<sup>5,39</sup> and further shed  
27  
28 light on circumstances that cannot be tested by USPs.  
29  
30  
31

32  
33 A limitation of the study, however, is that, in order to test the validity of VP  
34  
35 against USP as the reference standard, we restrict the selection of VP cases to those  
36  
37 that can be simulated by USP as well. Thus, the present study may not fully exhibit  
38  
39 the potential of the VP in assessing quality of care. Further, the two  
40  
41 purposely-selected counties for each province may not represent the provincial  
42  
43 conditions entirely, although we will make every effort to consider provincial  
44  
45 representation when selecting counties. Third, while the validation study is  
46  
47 exclusively conducted on PHCs in rural China, the extent to which the VP assessment  
48  
49 tool can be transported to other LMICs remains to be evaluated. Even so, the selected  
50  
51 provinces from the 'five-Chinas' may improve the generalizability of our study  
52  
53  
54  
55  
56  
57  
58  
59  
60

1  
2  
3  
4 considering the comparable life expectancies of LMICs and these provinces.  
5  
6  
7  
8  
9  
10  
11  
12  
13  
14  
15  
16  
17  
18  
19  
20  
21  
22  
23  
24  
25  
26  
27  
28  
29  
30  
31  
32  
33  
34  
35  
36  
37  
38  
39  
40  
41  
42  
43  
44  
45  
46  
47  
48  
49  
50  
51  
52  
53  
54  
55  
56  
57  
58  
59  
60

For peer review only

### **Author's contributions**

All authors contributed to the conceptualization and design of the study. DX, JL, and YYC conceived the initial study design, analytical methods, and composition of the team. JL was responsible for the study concept, initial draft, and revisions. DX was responsible for the study concept and revising the draft. YLC and XHW were responsible for the development of the scoring criteria. SS, HW, JNW, ZLZ, ZN, WJG, JP, CXT and WZ provided critical review and revision to the study design. All authors read and approved the final revision.

### **Funding**

The study is supported by the China Medical Board through its Health Policy and Systems Sciences Open Competition grant 'Quality in primary health care: using unannounced standardized patients' (grant No.: CMB16-260, XD, PI).

### **Acknowledgement**

The study will be led by the Sun Yat-sen Global Health Institute of Sun Yat-sen University with a consortium of researchers from seven other Chinese universities, including Central South University, Guangzhou University, Guizhou Medical University, Inner Mongolia Medical University, Lanzhou University, Sichuan University, and Xi'an Jiaotong University. We thank all the students from these universities who have contributed to our project, especially Wenjun He who produced Figure 1, Jianjian Wang who assisted with the evidence collection of the Scoring Criteria, and Ash Harris who contributed to the VP computerization.

### Competing interests

The development of the VP assessment tool is a joint project of the Sun Yat-sen University Global Health Institute (SGHI) (representing the seven universities in China), and *CureFUN*. However, the VP cases will be independently developed and the validation studies will be rigorously conducted by the research team from SGHI and the seven universities, whereas *CureFun* will technically implement the cases on smartphones and have no influence over the study design and analysis.

## REFERENCES

1. Kieny MP, Evans DB. Universal health coverage. *East Mediterr Health J* 2013;**19**(4):305-6
2. Transforming our world: The 2030 agenda for sustainable development. : United Nations- Sustainable Development Knowledge Platform, 2015.
3. Sylvia S, Shi Y, Xue H, et al. Survey using incognito standardized patients shows poor quality care in china's rural clinics. *Health Policy and Planning* 2014;**30**(3):322-33
4. Das J, Holla A, Das V, et al. In urban and rural india, a standardized patient study showed low levels of provider training and huge quality gaps. *Health Affairs* 2012;**31**(12):2774-84
5. Das J, Hammer J, Leonard K. The quality of medical advice in low-income countries. *The Journal of Economic Perspectives* 2008;**22**(2):93-114
6. Donabedian A. Evaluating the quality of medical care. *The Milbank Quarterly* 2005;**83**(4):691-729
7. Peabody JW, Luck J, Glassman P, et al. Comparison of vignettes, standardized patients, and chart abstraction: A prospective validation study of 3 methods for measuring quality. *JAMA* 2000;**283**(13):1715-22
8. Shah R, Edgar D, Evans BJ. Measuring clinical practice. *Ophthalmic and Physiological Optics* 2007;**27**(2):113-25
9. Glassman PA, Luck J, O'Gara EM, et al. Using standardized patients to measure quality: Evidence from the literature and a prospective study. *Joint Commission Journal on Quality Improvement* 2000;**26**(11):644-53
10. Glassman PA, Luck J, O'Gara EM, et al. Using standardized patients to measure quality: Evidence from the literature and a prospective study. *The Joint Commission journal on quality improvement* 2000;**26**(11):644-53
11. Collins J, Harden R. The use of real patients, simulated patients and simulators in clinical examinations Association for Medical Education in Europe (AMEE) Guide, 2004.
12. Triola M, Feldman H, Kalet AL, et al. A randomized trial of teaching clinical skills using virtual and live standardized patients. *Journal General Internal Medicine* 2006;**21**(5):424-9
13. Peabody JW, Luck J, Glassman P, et al. Measuring the quality of physician practice by using clinical vignettes: A prospective validation study. *Annals of Internal Medicine* 2004;**141**(10):771-80
14. Shah R, Edgar DF, Evans BJ. A comparison of standardised patients, record abstraction and clinical vignettes for the purpose of measuring clinical practice. *Ophthalmic and Physiological Optics* 2010;**30**(3):209-24
15. Dresselhaus TR, Peabody JW, Luck J, et al. An evaluation of vignettes for predicting variation in the quality of preventive care. *Journal of general internal medicine* 2004;**19**(10):1013-18
16. Ellaway R, Candler C, Greene P, et al. An architectural model for ubiquitous virtual patients. Baltimore: MedBiquitous, 2006.

17. Cook DA, Triola MM. Virtual patients: A critical literature review and proposed next steps. *Med Educ* 2009;**43**(4):303-11 doi: 10.1111/j.1365-2923.2008.03286.x[published Online First: Epub Date]].
18. Zhou M, Wang H, Zhu J, et al. Cause-specific mortality for 240 causes in china during 1990–2013: A systematic subnational analysis for the global burden of disease study 2013. *The Lancet* 2016;**387**(10015):251-72
19. Babiarz KS, Miller G, Yi H, et al. China's new cooperative medical scheme improved finances of township health centers but not the number of patients served. *Health Affairs* 2012;**31**(5):1065-74
20. Qian D, Pong RW, Yin A, et al. Determinants of health care demand in poor, rural china: The case of gansu province. *Health Policy and Planning* 2009;**24**(5):324-34
21. Yip WC, Wang H, Liu Y. Determinants of patient choice of medical provider: A case study in rural china. *Health Policy and Planning* 1998;**13**(3):311-22
22. An analysis report of national health services survey in china. Beijing: Center for Health Statistics and Information, NHFPC, 2013.
23. Brouwers MC, Kho ME, Browman GP, et al. Agree ii: Advancing guideline development, reporting and evaluation in health care. *Canadian Medical Association Journal* 2010;**182**(18):E839-E42
24. Whiting PF, Rutjes AW, Westwood ME, et al. Quadas-2: A revised tool for the quality assessment of diagnostic accuracy studies. *Annals of Internal Medicine* 2011;**155**(8):529-36
25. Hsu CC, Sandford BA. The delphi technique: Making sense of consensus. *Practical Assessment Research & Evaluation* 2007;**26**(10):289–304
26. Zamanzadeh V, Ghahramanian A, Rassouli M, et al. Design and implementation content validity study: Development of an instrument for measuring patient-centered communication. *Journal of Caring Sciences* 2015;**4**(2):165
27. Lacasse Y, Godbout C, Series F. Health-related quality of life in obstructive sleep apnoea. *European Respiratory Journal* 2002;**19**(3):499-503
28. Lawrence I, Lin K. A concordance correlation coefficient to evaluate reproducibility. *Biometrics* 1989:255-68
29. McBride G. A proposal for strength-of-agreement criteria for lin's concordance correlation coefficient. NIWA Client Report: HAM2005-062. Hamilton: National Institute of Water & Atmospheric Research, Ltd (NZ), 2005.
30. Kimberlin CL, Winetrstein AG. Validity and reliability of measurement instruments used in research. *American Journal of Health-System Pharmacy* 2008;**65**(23)
31. Rethans JJ, Gorter S, Bokken L, et al. Unannounced standardised patients in real practice: A systematic literature review. *Medical Education* 2007;**41**(6):537-49
32. Cohen J. A coefficient of agreement for nominal scales. *Educational and Psychological Measurement* 1960;**20**(1):37-46
33. Kwicien R, Koppsehneider A, Blettner M. Concordance analysis: Part 16 of a series on evaluation of scientific publications. *Deutsches Ärzteblatt International* 2011;**108**(30):515
34. Bland JM, Altman DG. Statistical methods for assessing agreement between two



- 1  
2  
3 methods of clinical measurement. *Lancet* 1986;**327**(8476):307-10  
4 35. McCabe D, Langer KG, Borod JC, et al. Practice effects. In: Kreutzer JS, DeLuca  
5 J, Caplan B, eds. *Encyclopedia of clinical neuropsychology*. New York: Springer  
6 2011:1988-89.  
7  
8 36. Cronbach LJ. Coefficient alpha and the internal structure of tests. *Psychometrika*  
9 1951;**16**(3):297-334  
10 37. DeVellis RF. *Scale development: Theory and applications*. Los Angeles: Sage  
11 2012:109-10.  
12 38. Rhodes KV, Miller FG. Simulated patient studies: An ethical analysis. *Milbank*  
13 *Quarterly* 2012;**90**(4):706-24  
14  
15 39. Mohanan M, Vera-Hernández M, Das V, et al. The know-do gap in quality of  
16 health care for childhood diarrhea and pneumonia in rural india. *JAMA Pediatrics*  
17 2015;**169**(4):349-57  
18  
19  
20  
21  
22  
23  
24  
25  
26  
27  
28  
29  
30  
31  
32  
33  
34  
35  
36  
37  
38  
39  
40  
41  
42  
43  
44  
45  
46  
47  
48  
49  
50  
51  
52  
53  
54  
55  
56  
57  
58  
59  
60

1  
2  
3 Figure 1. Seven sample provinces in China referencing countries of equivalent life  
4 expectancy in parentheses.  
5  
6  
7  
8  
9  
10  
11  
12  
13  
14  
15  
16  
17  
18  
19  
20  
21  
22  
23  
24  
25  
26  
27  
28  
29  
30  
31  
32  
33  
34  
35  
36  
37  
38  
39  
40  
41  
42  
43  
44  
45  
46  
47  
48  
49  
50  
51  
52  
53  
54  
55  
56  
57  
58  
59  
60

For peer review only

1  
2  
3  
4  
5  
6  
7  
8  
9  
10  
11  
12  
13  
14  
15  
16  
17  
18  
19  
20  
21  
22  
23  
24  
25  
26  
27  
28  
29  
30  
31  
32  
33  
34  
35  
36  
37  
38  
39  
40  
41  
42  
43  
44  
45  
46  
47  
48  
49  
50  
51  
52  
53  
54  
55  
56  
57  
58  
59  
60

Figure 2. VP case development team role and responsibilities.

For peer review only

1  
2  
3  
4 Figure 3. Main components of smartphone-based VP program.  
5  
6  
7  
8  
9  
10  
11  
12  
13  
14  
15  
16  
17  
18  
19  
20  
21  
22  
23  
24  
25  
26  
27  
28  
29  
30  
31  
32  
33  
34  
35  
36  
37  
38  
39  
40  
41  
42  
43  
44  
45  
46  
47  
48  
49  
50  
51  
52  
53  
54  
55  
56  
57  
58  
59  
60

For peer review only

1  
2  
3  
4  
5  
6  
7  
8  
9  
10  
11  
12  
13  
14  
15  
16  
17  
18  
19  
20  
21  
22  
23  
24  
25  
26  
27  
28  
29  
30  
31  
32  
33  
34  
35  
36  
37  
38  
39  
40  
41  
42  
43  
44  
45  
46  
47  
48  
49  
50  
51  
52  
53  
54  
55  
56  
57  
58  
59  
60

Figure 4. Sampling and study process for one VP case in Danzhai County, Guizhou Province (THC: township health center; VC: village clinic)

For peer review only

Table 1. The strengths and limitations of methods to assess care quality.

| Process Measure of Quality             | Strengths                                                                                                                                                                                 | Limitations                                                                                                   | Assessment Level                                                                              |
|----------------------------------------|-------------------------------------------------------------------------------------------------------------------------------------------------------------------------------------------|---------------------------------------------------------------------------------------------------------------|-----------------------------------------------------------------------------------------------|
| Unannounced Standardized Patient (USP) | Standardized, controlling for case-mix and patient-mix;<br>Unannounced, no Hawthorne effect (if not be detected);<br>Reduced recall bias                                                  | Expensive<br>Limited medical conditions<br>First-visit bias<br>Selection bias if informed consent is required | <b>Action (Do)</b><br><b>Gold standard</b>                                                    |
| Clinical Vignettes                     | Cost-effective;<br>Suitable for large scale and cross-system comparison;<br>Covering all illnesses;<br>Accounting for case-mix and patient-mix.                                           | Hawthorne effect<br>Selection bias                                                                            | <b>Competence (Know how)</b><br><b>Over-estimating</b> care quality (best answers) or similar |
| Virtual Patients (VP)                  | Interactive<br>Real-time response & automatic record<br>Highly standardized<br>Scalability & low marginal cost<br>Efficient delivery: anytime, anywhere<br>Suitable for large scale study | Hawthorne effect<br>Selection bias<br>High cost in initial development                                        | <b>Performance (Show how)</b><br>?                                                            |

Table 2. Main validation domains of the study.

| Domain                  | Indicator                                                      | Data collection   |                                                                                                                                                                                                                                                       | Statistical analysis                                                                                                                                                                                                                                                                   |
|-------------------------|----------------------------------------------------------------|-------------------|-------------------------------------------------------------------------------------------------------------------------------------------------------------------------------------------------------------------------------------------------------|----------------------------------------------------------------------------------------------------------------------------------------------------------------------------------------------------------------------------------------------------------------------------------------|
|                         |                                                                | Phase             | Method                                                                                                                                                                                                                                                |                                                                                                                                                                                                                                                                                        |
| Content validity        | Content validity index (CVI)                                   | VP case review    | Evaluations by an expert panel after reviewing VP cases, measured by a 4-point Likert scale (1=lowest, 4=highest).                                                                                                                                    | CVI for VP case and for specific VP domain will be computed, where $CVI = \frac{\text{number of raters giving a rating of 3 or 4}}{\text{total number of raters}}$ .                                                                                                                   |
| Feasibility             | Willingness to participate; Adherence rate                     | Feasibility study | The subsample of clinicians' interactions with the 2 VP cases will be recorded by the online assessment                                                                                                                                               | Willingness to participate = clinicians taking the VP tests/clinician being selected %<br>Adherence rate = clinicians completed 2 VP cases/clinicians taking the VP tests %                                                                                                            |
| Face validity           | Satisfying score                                               |                   | Clinicians' subjective attitude toward the VP test experience measured by a 5-point Likert scale (1=most negative, 5=most positive).                                                                                                                  | Satisfying score for VP case and for specific aspects (e.g., usability, accessibility, etc.) will be computed, where satisfying score = frequency (%) * positive evaluations (3 to 5), and scores $\geq 1.5$ are considered acceptable.                                                |
| Criterion validity      | Concordance correlation coefficient ( $r_c$ ); Kappa statistic | Validation study  | The same clinician receives a USP visit and a VP test for a matching condition. The USP-clinician interaction is evaluated by the USP using the checklist, including fees and time per visit; while VP-clinician interaction is graded by the system. | The concordance of VP-test scores against USP-test score (gold standard) or two-repeated VP-tests will be examined by $r_c$ for continuous process quality scores, fees charged (yuan), and time spent (min); and Kappa for dichotomous diagnoses and treatment & management measures. |
| Test-retest Reliability |                                                                |                   | Repeat VP-tests on the same clinician in a month                                                                                                                                                                                                      |                                                                                                                                                                                                                                                                                        |
| Internal consistency    | Cronbach's alpha coefficient ( $\alpha$ )                      |                   | VP-test scores on a single occasion                                                                                                                                                                                                                   | Intercorrelation of scores for process quality indicators with $\alpha > 0.7$ is acceptable.                                                                                                                                                                                           |

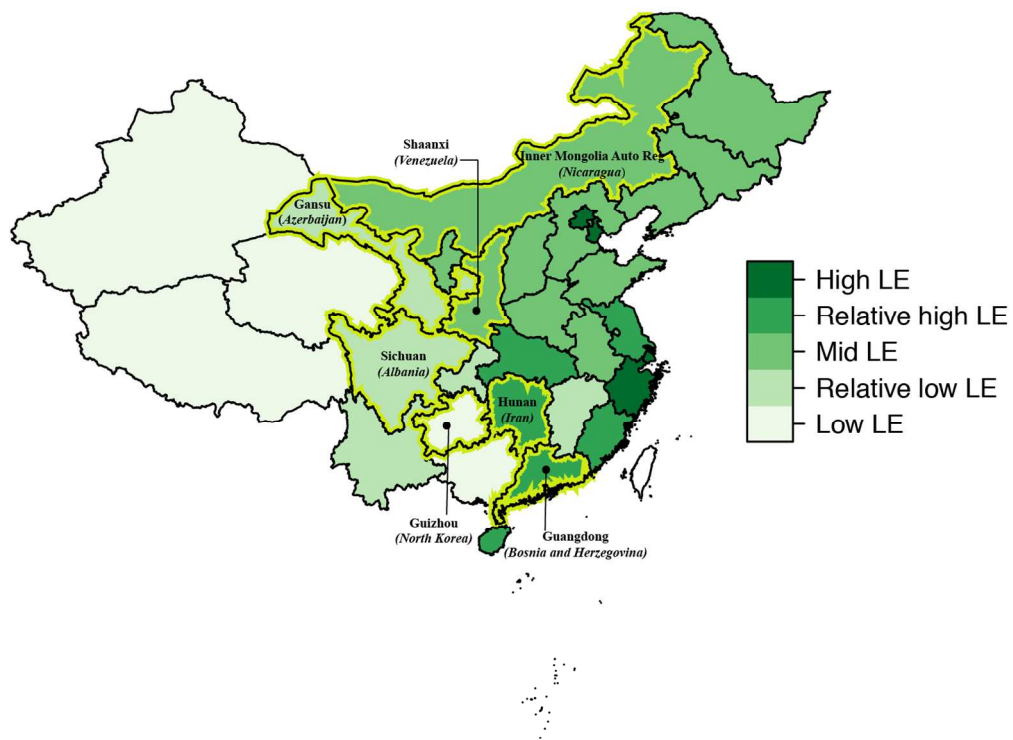

Figure 1. Seven sample provinces in China referencing countries of equivalent life expectancy in parentheses.

133x98mm (300 x 300 DPI)

www only



1  
2  
3  
4  
5  
6  
7  
8  
9  
10  
11  
12  
13  
14  
15  
16  
17  
18  
19  
20  
21  
22  
23  
24  
25  
26  
27  
28  
29  
30  
31  
32  
33  
34  
35  
36  
37  
38  
39  
40  
41  
42  
43  
44  
45  
46  
47  
48  
49  
50  
51  
52  
53  
54  
55  
56  
57  
58  
59  
60

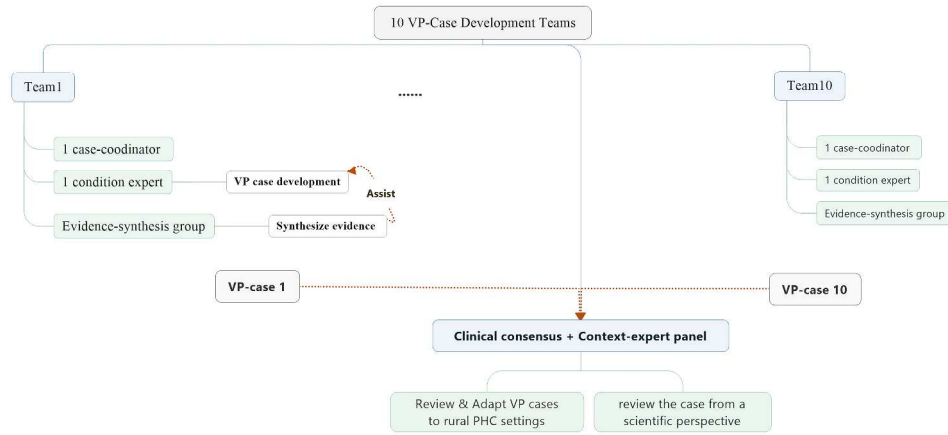

Figure 2. VP case development team role and responsibilities.

654x317mm (300 x 300 DPI)

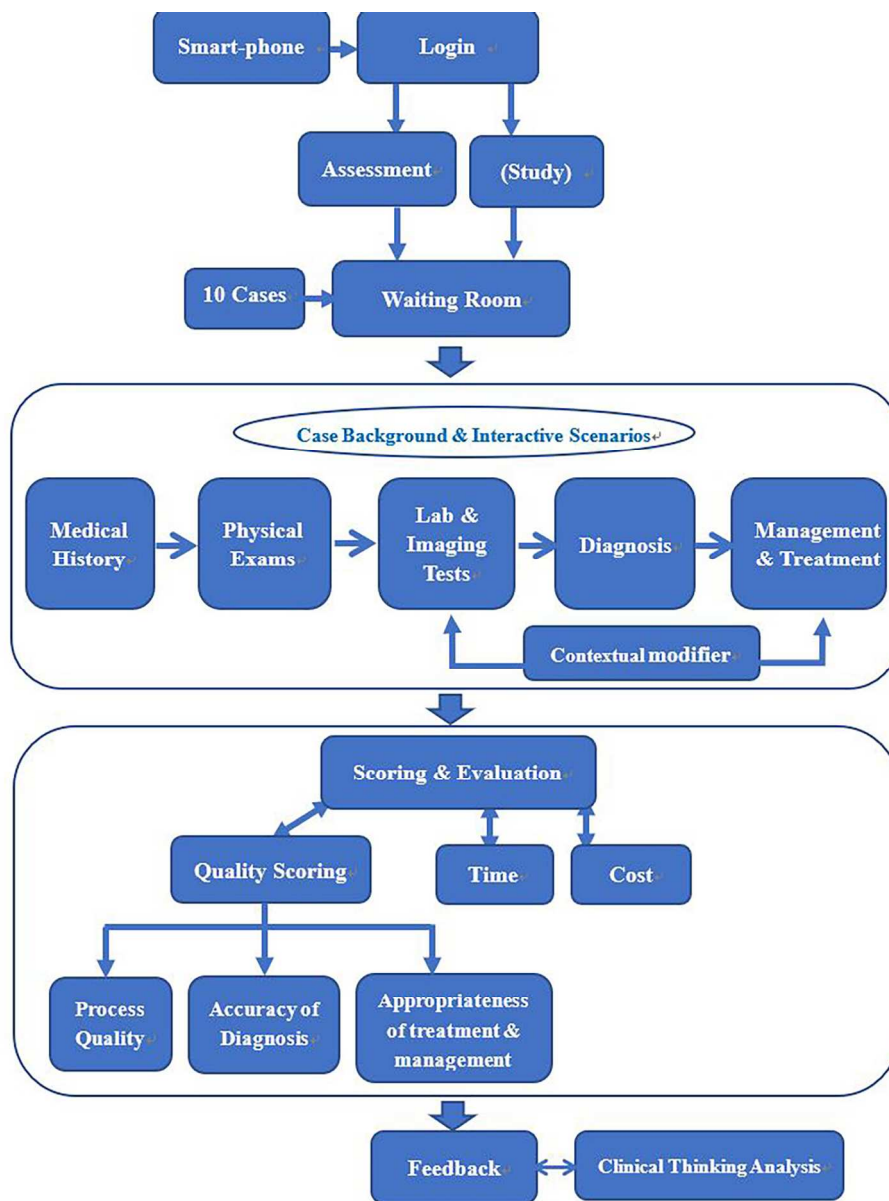

Figure 3. Main components of smartphone-based VP program. (VP: virtual patient)

158x203mm (300 x 300 DPI)

1  
2  
3  
4  
5  
6  
7  
8  
9  
10  
11  
12  
13  
14  
15  
16  
17  
18  
19  
20  
21  
22  
23  
24  
25  
26  
27  
28  
29  
30  
31  
32  
33  
34  
35  
36  
37  
38  
39  
40  
41  
42  
43  
44  
45  
46  
47  
48  
49  
50  
51  
52  
53  
54  
55  
56  
57  
58  
59  
60

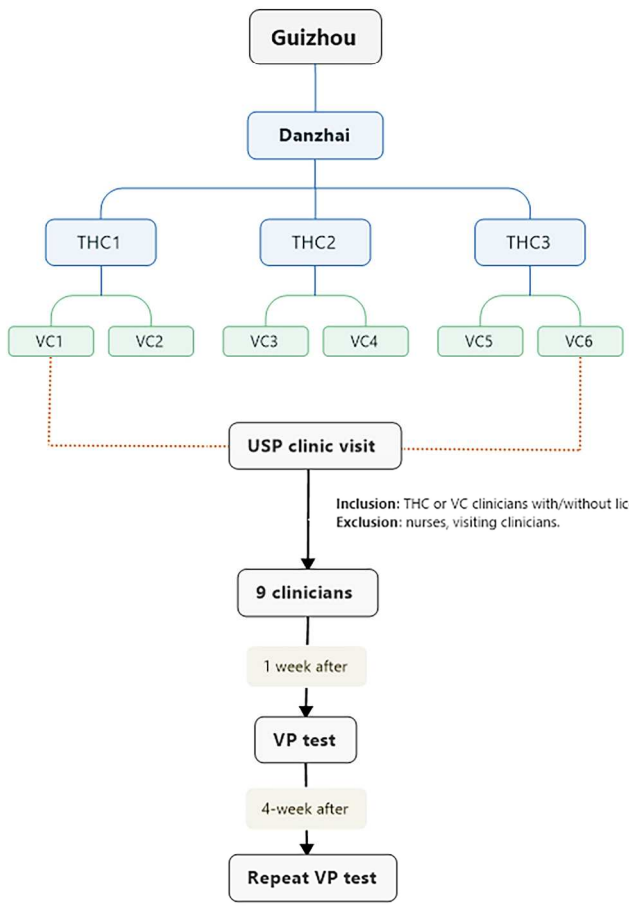

Sampling and study process for one VP case in Danzhai County, Guizhou Province (THC: township health center; VC: village clinic)

275x269mm (300 x 300 DPI)

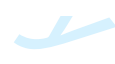

Appendix 1. Top 30 conditions of high-frequency clinical encounters in primary health care settings in rural China.

| Clinical condition          | Two-week consultation constituent ratio <sup>1</sup> |      | Township health center <sup>2</sup> |       | Village clinics <sup>2</sup> |       |
|-----------------------------|------------------------------------------------------|------|-------------------------------------|-------|------------------------------|-------|
|                             | RANK                                                 | %    | RANK                                | %     | RANK                         | %     |
| Cold                        | <b>1</b>                                             | 28   | <b>1</b>                            | 13.60 | <b>1</b>                     | 19.50 |
| Hypertension                | <b>2</b>                                             | 21.8 | <b>4</b>                            | 7.90  | <b>6</b>                     | 9.80  |
| Diabetes mellitus           | <b>4</b>                                             | 3.9  | <b>7</b>                            | 4.60  | <b>8</b>                     | 4.60  |
| Chronic tracheitis          | <b>8</b>                                             | 2    | <b>2</b>                            | 9.50  | <b>4</b>                     | 10.50 |
| Acute tracheitis            |                                                      |      | <b>3</b>                            | 9.00  | <b>3</b>                     | 10.70 |
| Gastritis                   | <b>3</b>                                             | 5.5  | <b>5</b>                            | 7.50  | <b>5</b>                     | 10.30 |
| Diarrhea                    |                                                      |      | <b>6</b>                            | 5.30  | <b>2</b>                     | 11.70 |
| Urinary tract infection     |                                                      |      | <b>8</b>                            | 4.50  | <b>9</b>                     | 2.90  |
| Osteoarthritis              | <b>7</b>                                             | 2.30 | <b>17</b>                           | 2.40  | <b>18</b>                    | 0.50  |
| Low back pain               | <b>5</b>                                             | 3.10 | <b>16</b>                           | 2.50  | <b>15</b>                    | 0.80  |
| Psoatic strain              |                                                      |      | <b>14</b>                           | 2.60  | <b>14</b>                    | 0.80  |
| Peptic ulcer                |                                                      |      | <b>11</b>                           | 2.90  | <b>11</b>                    | 1.70  |
| General trauma              |                                                      |      | <b>10</b>                           | 3.10  | <b>13</b>                    | 1.10  |
| Sciatica                    |                                                      |      | <b>19</b>                           | 1.80  | <b>22</b>                    | 0.30  |
| Child dyspepsia             |                                                      |      | <b>9</b>                            | 3.20  | <b>7</b>                     | 7.00  |
| Pelvic inflammatory disease |                                                      |      | <b>12</b>                           | 2.70  | <b>16</b>                    | 0.60  |
| Vaginitis                   |                                                      |      | <b>13</b>                           | 2.70  | <b>17</b>                    | 0.50  |
| Dysmenorrhoea               |                                                      |      | <b>18</b>                           | 2.30  | <b>19</b>                    | 0.50  |
| Cholecystitis               |                                                      |      | <b>15</b>                           | 2.60  | <b>12</b>                    | 1.60  |
| Toothache                   | <b>10</b>                                            | 1.30 | <b>22</b>                           | 1.30  | <b>10</b>                    | 2.70  |
| Menopausal syndrome         |                                                      |      | <b>21</b>                           | 1.40  | <b>27</b>                    | 0.10  |
| Cholelithiasis              |                                                      |      | <b>20</b>                           | 1.60  | <b>20</b>                    | 0.40  |
| Idiopathic headache         | <b>6</b>                                             | 2.50 | <b>25</b>                           | 0.60  | <b>25</b>                    | 0.20  |
| Hemorrhoids                 |                                                      |      | <b>23</b>                           | 1.10  | <b>21</b>                    | 0.40  |
| Asthma                      |                                                      |      | <b>28</b>                           | 0.60  | <b>26</b>                    | 0.20  |
| Chronic dermatitis          |                                                      |      | <b>29</b>                           | 0.20  | <b>29</b>                    | 0.10  |
| Tympanitis                  |                                                      |      | <b>24</b>                           | 0.70  | <b>24</b>                    | 0.20  |
| Conjunctivitis              |                                                      |      | <b>27</b>                           | 0.60  | <b>28</b>                    | 0.10  |
| Sinusitis                   |                                                      |      | <b>26</b>                           | 0.60  | <b>23</b>                    | 0.30  |
| Ischemic heart disease      | <b>9</b>                                             | 1.5  |                                     |       |                              |       |

<sup>1</sup> Self-reported two-week consultation constituent ratio by community dwellers, information from the 2013 National Health Service Survey in China.

<sup>2</sup> Clinicians reported common clinical conditions in primary health care centers by centers' type.

## Appendix 2. Methods for checklist and standards development

To evaluate the quality of care in primary health care institutions, key diagnosis and treatment points of common and frequently-occurring diseases will be developed. The *WHO Handbook for Guideline Development* and evidence-based evaluation principles will be adopted. The main procedures are comprised in the following six steps that will be implemented.

1. Expert group recruitment: Convene a multidisciplinary group consisting of experts in public health, evidence-based medicine/document retrieval, as well as clinical physicians.
2. Data retrieval and literature evaluation: Employ a 5S model to retrieve and incorporate clinical practice guidelines, textbooks, systematic reviews, meta-analysis, and important literature reviews. Retrieve literature from Wanfang, Medlive, MEDLINE, National Guideline Clearinghouse (NGC), National Institute for Health and Care Excellence (NICE), World Health Organization (WHO), DynaMed, and UpToDate. Evaluate the literature using AGREE II, AMSTAR, and QUADAS-2 for the included clinical practice guidelines, systematic reviews, and diagnostic tests, respectively.
3. Preliminary items pool development: Extract essential diagnostic and treatment procedures from the high-quality literature attained.
4. Clinical expert consensus: Apply a 2- to 3-round Delphi method to achieve consensus for diagnosis and treatment. The importance, necessity, and feasibility of the items should be considered in the process of Delphi, and additional medical information must be supplemented in terms of the clinical practice. Furthermore, all items should be classified as: necessary (3 points), selective (2 points), irrelevant (1 points), and erroneous (0 points).
5. Pilot and revise: Conduct a pilot test among 2~3 primary health care settings using the preliminary items. Revise the items and finalize the key diagnosis and treatment point evaluation items.

- 1
  - 2
  - 3
  - 4
  - 5
  - 6
  - 7
  - 8
  - 9
  - 10
  - 11
  - 12
  - 13
  - 14
  - 15
  - 16
  - 17
  - 18
  - 19
  - 20
  - 21
  - 22
  - 23
  - 24
  - 25
  - 26
  - 27
  - 28
  - 29
  - 30
  - 31
  - 32
  - 33
  - 34
  - 35
  - 36
  - 37
  - 38
  - 39
  - 40
  - 41
  - 42
  - 43
  - 44
  - 45
  - 46
  - 47
  - 48
  - 49
  - 50
  - 51
  - 52
  - 53
  - 54
  - 55
  - 56
  - 57
  - 58
  - 59
  - 60
6. Script development: Develop the script of the target disease based on key diagnosis and treatment point evaluation items before conducting the quality of service evaluation in primary health care institutions.

For peer review only

Appendix 3. Demonstrations of *Cure-Fun* smartphone-based platform current configurations of interview, physical exam and lab texts, and treatment.

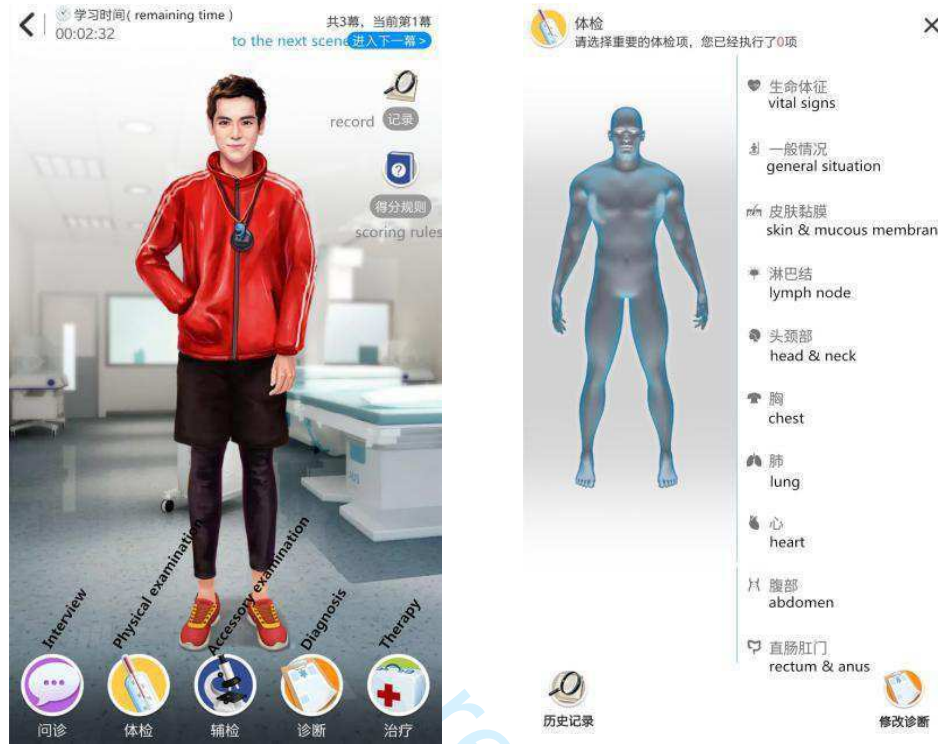

# BMJ Open

## Using smartphone-based virtual patients to assess the quality of primary health care in rural China: protocol for a prospective multicenter study

|                                 |                                                                                                                                                                                                                                                                                                                                                                                                                                                                                                                                                                                                                                                                                                                                                                                                                                                                                                                                                                                                                                                                                                                                                                                                                                                                                                                                                                                                                                                                                                                                                                                                                                                                                                                        |
|---------------------------------|------------------------------------------------------------------------------------------------------------------------------------------------------------------------------------------------------------------------------------------------------------------------------------------------------------------------------------------------------------------------------------------------------------------------------------------------------------------------------------------------------------------------------------------------------------------------------------------------------------------------------------------------------------------------------------------------------------------------------------------------------------------------------------------------------------------------------------------------------------------------------------------------------------------------------------------------------------------------------------------------------------------------------------------------------------------------------------------------------------------------------------------------------------------------------------------------------------------------------------------------------------------------------------------------------------------------------------------------------------------------------------------------------------------------------------------------------------------------------------------------------------------------------------------------------------------------------------------------------------------------------------------------------------------------------------------------------------------------|
| Journal:                        | <i>BMJ Open</i>                                                                                                                                                                                                                                                                                                                                                                                                                                                                                                                                                                                                                                                                                                                                                                                                                                                                                                                                                                                                                                                                                                                                                                                                                                                                                                                                                                                                                                                                                                                                                                                                                                                                                                        |
| Manuscript ID                   | bmjopen-2017-020943.R1                                                                                                                                                                                                                                                                                                                                                                                                                                                                                                                                                                                                                                                                                                                                                                                                                                                                                                                                                                                                                                                                                                                                                                                                                                                                                                                                                                                                                                                                                                                                                                                                                                                                                                 |
| Article Type:                   | Protocol                                                                                                                                                                                                                                                                                                                                                                                                                                                                                                                                                                                                                                                                                                                                                                                                                                                                                                                                                                                                                                                                                                                                                                                                                                                                                                                                                                                                                                                                                                                                                                                                                                                                                                               |
| Date Submitted by the Author:   | 03-Mar-2018                                                                                                                                                                                                                                                                                                                                                                                                                                                                                                                                                                                                                                                                                                                                                                                                                                                                                                                                                                                                                                                                                                                                                                                                                                                                                                                                                                                                                                                                                                                                                                                                                                                                                                            |
| Complete List of Authors:       | Liao, Jing; Sun Yat-sen University, Department of Epidemiology and Biostatistics, School of Public Health; Sun Yat-sen University, Sun Yat-sen Global Health Institute, Institute of State Governance<br>Chen, Yao-Long; Lanzhou University, Evidence-Based Medicine Center, School of Basic Medical Sciences<br>Cai, Yiyuan; Sun Yat-sen University, Department of Epidemiology and Biostatistics, School of Public Health; Guizhou Medical University, School of Public Health<br>Zhang, Nan; Inner Mongolia Medical University, Department of Health Management, School of Health Management<br>Sylvia, Sean ; University of North Carolina at Chapel Hill, Department of Health Policy and Management, Gillings School of Global Public Health<br>Hanson, Kara; London School of Hygiene & Tropical Medicine<br>Wang, Hong; Bill & Melinda Gates Foundation, Health Economics, Financing & Systems<br>Wasserheit, Judith; University of Washington, Departments of Global Health, Medicine, and Epidemiology, Schools of Medicine and Public Health<br>Gong, Wenjie; Central South University, School of Public Health; University of Rochester Medical Center, Department of Psychi<br>Zhou, Zhongliang; Xi'an Jiaotong University,<br>Pan, Jay; Sichuan University, West China School of Public Health<br>Wang, Xioahui; Lanzhou University, School of Public Health<br>Tang, Chengxiang; Guangzhou University, School of Public Administration<br>Zhou, Wei; Xiangya Hospital Central South University,<br>Xu, Dong; Sun Yat-sen University , Sun Yat-sen Global Health Institute, Institute of State Governance; Sun Yat-sen University, Department of Epidemiology and Biostatistics, School of Public Health |
| <b>Primary Subject Heading</b>: | Public health                                                                                                                                                                                                                                                                                                                                                                                                                                                                                                                                                                                                                                                                                                                                                                                                                                                                                                                                                                                                                                                                                                                                                                                                                                                                                                                                                                                                                                                                                                                                                                                                                                                                                                          |
| Secondary Subject Heading:      | Public health                                                                                                                                                                                                                                                                                                                                                                                                                                                                                                                                                                                                                                                                                                                                                                                                                                                                                                                                                                                                                                                                                                                                                                                                                                                                                                                                                                                                                                                                                                                                                                                                                                                                                                          |
| Keywords:                       | Quality in health care < HEALTH SERVICES ADMINISTRATION & MANAGEMENT, PRIMARY CARE, care quality assessment tool                                                                                                                                                                                                                                                                                                                                                                                                                                                                                                                                                                                                                                                                                                                                                                                                                                                                                                                                                                                                                                                                                                                                                                                                                                                                                                                                                                                                                                                                                                                                                                                                       |
|                                 |                                                                                                                                                                                                                                                                                                                                                                                                                                                                                                                                                                                                                                                                                                                                                                                                                                                                                                                                                                                                                                                                                                                                                                                                                                                                                                                                                                                                                                                                                                                                                                                                                                                                                                                        |



1  
2  
3  
4  
5  
6  
7  
8  
9  
10  
11  
12  
13  
14  
15  
16  
17  
18  
19  
20  
21  
22  
23  
24  
25  
26  
27  
28  
29  
30  
31  
32  
33  
34  
35  
36  
37  
38  
39  
40  
41  
42  
43  
44  
45  
46  
47  
48  
49  
50  
51  
52  
53  
54  
55  
56  
57  
58  
59  
60

SCHOLARONE™  
Manuscripts

For peer review only

Using smartphone-based virtual patients to assess the quality of primary health care in rural China: protocol for a prospective multicenter study

Jing Liao<sup>1,2</sup>, Yaolong Chen<sup>3</sup>, Yiyuan Cai<sup>4</sup>, Nan Zhan<sup>5</sup>, Sean Sylvia<sup>6</sup>, Kara Hanson<sup>7</sup>, Hong Wang<sup>8</sup>, Judith N Wasserheit<sup>9</sup>, Wenjie Gong<sup>10</sup>, Zhongliang Zhou<sup>11</sup>, Jay Pan<sup>12</sup>, Xiaohui Wang<sup>13</sup>, Chenxiang Tang<sup>14</sup>, Wei Zhou<sup>15</sup>, Dong Xu<sup>1,2\*</sup>

<sup>1</sup> Department of Epidemiology and Biostatistics, School of Public Health, Sun Yat-sen University, No.74 Zhongshan 2nd Road, Guangzhou, P.R. China, 510080

<sup>2</sup> Sun Yat-sen Global Health Institute, Institute of State Governance, Sun Yat-sen University, No.135 Xingang West Road, P.R. China, 510275

<sup>3</sup> Evidence Based Medicine Center, School of Basic Medical Sciences, Lanzhou University, No. 199 Donggang West Rd, Lanzhou City, Gansu Province, 730000 China

<sup>4</sup> School of Public Health, Guizhou Medical University, UniverCity of Guan New Area, Guizhou, China, 550025

<sup>5</sup> Department of Health Management, School of Health Management, Inner Mongolia Medical University, Jinshan Development Zone, Hohhot, Inner Mongolia, P.R. China, 010110

<sup>6</sup> Department of Health Policy and Management, Gillings School of Global Public Health, University of North Carolina at Chapel Hill, CB#7411, Chapel Hill, NC 27599, USA

<sup>7</sup> Department of Global Health and Development, Faculty of Public Health and Policy, London School of Hygiene and Tropical Medicine, WC1H 9SH, London, United Kingdom

<sup>8</sup> Health Economics, Financing & Systems, PO Box 23350, Seattle WA, 98102, USA

<sup>9</sup> Departments of Global Health, Medicine, and Epidemiology, Schools of Medicine and Public Health, University of Washington, 1705 NE Pacific Street, Box 357965 Seattle, Washington, 98195-7965, United States

<sup>10</sup> Xiangya school of public health, Central South University, Xiangya school of public health, Central South University, China

<sup>11</sup> School of Public Policy and Administration, Xi'an Jiaotong University, No. 28 Xianning West Road, Xi'an, Shaanxi, 710049, China.

<sup>12</sup> West China School of Public Health, Sichuan University, No. 17, Ren Min Nan Road, Chengdu, China

<sup>13</sup> School of Public Health, Lanzhou University, Lanzhou, Gansu Province, P. R. China, 730000

<sup>14</sup> School of Public Administration, Guangzhou University, Guangzhou, Guangdong, 510320, China.

<sup>15</sup> Hospital Administration Institute, Xinagya Hospital, Central South University, No. 87 Xiangya Road, Changsha, Hunan., China

Corresponding author\*: Dong Xu, [xudong5@mail.sysu.edu.cn](mailto:xudong5@mail.sysu.edu.cn), Department of Epidemiology and Biostatistics, School of Public Health, Sun Yat-sen University, No.74 Zhongshan 2nd Road, Guangzhou, P.R. China, 510080

## ABSTRACT

**Introduction:** Valid and low-cost quality assessment tools are not readily available. The Unannounced Standardized Patient (USP), the gold standard for assessing quality, is restricted by a high implementation cost; while clinical vignettes, as a low-cost alternative, have been questioned by their validity. Computerized virtual patients (VPs) create high-fidelity and interactive simulations of doctor-patient encounters which can be easily implemented via smartphone at low marginal cost. Our study thus aims to develop and validate smartphone-based VP as a quality assessment tool for primary care, compared to USP.

**Methods and analysis:** The study will be implemented in outpatient settings of primary health centers (PHCs) in rural areas of seven Chinese provinces, and physicians practicing at township health centers and village clinics will be our study population. The development of VPs will involve three steps: (1) identifying 10 VP cases that can best represent rural PHCs' work, (2) designing each case by a case-specific development team, and (3) developing corresponding quality scoring criteria. After being externally reviewed for content validation, these VP cases will be implemented on a smartphone-based platform and will be tested for feasibility and face validity. This smartphone-based VP tool will then be validated for its criterion validity against USP and its reliability (i.e., internal consistency and stability), with 1260 VP/USP-clinician encounters across the seven study provinces for all 10 VP cases.

**Ethics and dissemination:** Sun Yat-sen University: No. 2017-007. Study findings will be published and the tools developed will be freely available to low- and

1  
2  
3 middle-income countries for research purposes.  
4  
5

6 Strengths and limitations of this study  
7

- 8 ● Developing and validating smartphone-based VP as a quality assessment tool  
9 for research and routine use in rural primary health care centers.
- 10 ● Following an evidence-based approach to develop VP cases and scoring  
11 criteria.
- 12 ● Systematically validating the VP assessment tool via a cross-national  
13 multicenter study
- 14 ● The extent to which the VP assessment can reflect practitioners' real clinical  
15 practice needs to be verified.  
16  
17

18  
19 **Key words:** Quality in health care, primary care, care quality assessment tool  
20  
21  
22  
23  
24  
25  
26  
27  
28  
29  
30  
31  
32  
33  
34  
35  
36  
37  
38  
39  
40  
41  
42  
43  
44  
45  
46  
47  
48  
49  
50  
51  
52  
53  
54  
55  
56  
57  
58  
59  
60

## INTRODUCTION

Universal health coverage (UHC) is a paramount goal of health system development for countries at all income levels.<sup>1</sup> The achievement of UHC is not possible without primary health care services,<sup>1</sup> which ensure integrated care close to the population they serve and link to health-related sustainable development goals.<sup>2</sup> However, service coverage alone cannot improve health outcomes if the quality of care is poor. Despite the fact that great emphasis has been made to enhance health care services, a dearth of scientific evidence exists on the quality of primary health care in resource-poor settings, particularly of low- and middle- income countries (LMICs).<sup>3-6</sup>

This scarcity of evidence may partially result from the limited availability of valid, low cost, and easy-to-implement quality assessment tools<sup>7</sup>. As defined by Donabedian's framework for health care quality, quality can be evaluated by the *structure* of care (e.g., staff, equipment), the *process* of care delivery (e.g., doctor-patient interactions), and health *outcomes* (e.g., death or complications).<sup>8</sup> Process measures have been increasingly adopted, considering the benefits of frequent and timely evaluation, and the usefulness in improving practice.<sup>9 10</sup> The 'gold standard' of assessing process is the unannounced standardized patient (USP), namely a trained actor who simulates the symptoms, signs, and emotions of a real patient in a standardized fashion and presents him- or herself unannounced to clinics to assess care quality.<sup>11</sup> USP can reduce recall bias better than patient exit interviews, minimize the Hawthorne effect that inevitably occurs in direct observation, and allow for comparisons between users as case- and patient-mix are controlled.<sup>3 9 11</sup> Nonetheless,

1  
2  
3 the USP can only portray a limited number of conditions without obvious  
4 physiological symptoms and risk of invasive examinations. Also, training and  
5 implementation of USP can require substantial personnel and resources, making USP  
6 impractical for large-scale and routine quality assessment.<sup>12 13</sup>  
7  
8  
9  
10  
11  
12

13 On the other hand, clinical vignettes or case simulations have been widely used  
14 as a low-cost and convenient alternative to assess care quality.<sup>9 14</sup> Vignettes have been  
15 implemented in a paper-and-pencil form,<sup>9</sup> presented by an enumerator,<sup>5</sup> and  
16 streamlined by a computer.<sup>14</sup> The validity of the vignette in assessing the quality of  
17 patient care has gotten mixed reports. Some studies showed that vignettes only reflect  
18 clinicians' competency (know-how) rather than their actual behaviors and can cause  
19 overestimation of clinical performance.<sup>9 15</sup> By contrast, other studies found that  
20 vignette-based results, particularly those streamlined by computer, are quite close to  
21 the USP-based assessment.<sup>14 16</sup> The enumerator-administered vignette is similar to the  
22 announced standardized patient and thus is expensive and difficult to implement.<sup>5</sup> A  
23 computerized vignette can be interactive and can better represent the realistic  
24 complexity of a clinical encounter.<sup>14</sup> As a further improvement on computerized  
25 vignettes,<sup>14</sup> smartphone virtual patients (VPs) create high-fidelity, visualized, and  
26 interactive simulations that replicate clinical complexity and can be easily  
27 implemented at only marginal cost.<sup>17</sup> Although VPs cannot remove the Hawthorne  
28 effect, their advanced features may reduce the measurement gap between competency  
29 and real practice.<sup>10 14</sup> While VPs have been used in medical education to train and test  
30 clinical skills such as clinical reasoning, making diagnoses, and therapeutic  
31  
32  
33  
34  
35  
36  
37  
38  
39  
40  
41  
42  
43  
44  
45  
46  
47  
48  
49  
50  
51  
52  
53  
54  
55  
56  
57  
58  
59  
60

1  
2  
3 decisions,<sup>18</sup> the relative validity of their use as a measure for the quality of care has  
4 yet to be studied. Strengths and limitations of the abovementioned three methods are  
5  
6 compared in Table 1.  
7  
8  
9

10  
11 In the present study, we propose to adapt smartphone-based VP for medical  
12 education as a quality-of-care assessment tool, given its advantages in 1)  
13 **standardization** (VPs are highly standardized, ensuring consistent assessments across  
14 users), 2) **flexibility** (Assessments can be delivered by smartphones for multiple users  
15 at anytime, anywhere, providing the data connectivity is available), 3) **scalability**  
16 (VPs can be modified to demonstrate and assess almost any clinical conditions with  
17 low marginal cost), and 4) **training** (VPs can further be used as a training tool to  
18 improve health care quality and thus to address the ‘so what’ question after quality  
19 assessment). These characteristics may especially benefit quality assessment and  
20 improvement in primary care of rural communities which are geographically scattered  
21 and difficult to reach and manage.  
22  
23  
24  
25  
26  
27  
28  
29  
30  
31  
32  
33  
34  
35  
36  
37

38 Therefore, our study aims to develop and validate **smartphone-based VPs**  
39 against USPs as a quality assessment tool that can not only be used for research  
40 purposes but also routinely applied to evaluate the quality of primary health care  
41 provided by primary health centers (PHCs) in rural areas. To maximize its validity,<sup>14</sup>  
42 we will properly construct high-fidelity VP cases to reflect clinical complexity in rural  
43 PHC contexts with real-time patient-doctor interactions and temporal constraints, as  
44 well as use evidence-based quality care scoring criteria; additionally, we will make  
45 the VP-based test anonymous to minimize the Hawthorne effect. The initial phase of  
46  
47  
48  
49  
50  
51  
52  
53  
54  
55  
56  
57  
58  
59  
60

1  
2  
3 the study will mainly focus on rural China, while the ultimate goal is to develop and  
4  
5  
6 validate tools that can have a broad application in other LMICs.  
7

## 8 METHODS AND ANALYSIS 9

### 10 **Study setting**

11  
12 The validation study will be implemented in the outpatient setting of rural PHCs (i.e.,  
13  
14 township health centers and village clinics) in seven Chinese provinces (Guizhou,  
15  
16 Sichuan, Gansu, Inner Mongolia, Shaanxi, Hunan, and Guangdong). We are selecting  
17  
18 these provinces not only to reflect the five strata of low-to-high life-expectancies and  
19  
20 various burden-of-disease patterns in China,<sup>19</sup> but also to contrast geographic regions  
21  
22 with ethnic diversities, from southwest mountainous regions, to the northern plateau,  
23  
24 middle inland region, and southeast coastal areas (**Error! Reference source not**  
25  
26 **found.**). Our study targets township health centers and village clinics because they  
27  
28 provide most primary health care in rural China.<sup>20 21</sup> At township health centers,  
29  
30 primary health care is delivered by a workforce including licensed/unlicensed  
31  
32 physicians, licensed/unlicensed assistant physicians, and registered nurses; while at  
33  
34 village clinics, services are mainly delivered by one full- or part-time ‘village doctor’  
35  
36 who is a clinician with rudimentary medical training.<sup>20 22 23</sup> The outpatient setting is  
37  
38 chosen due to the few inpatient cases in township health centers and village clinics.  
39  
40  
41  
42  
43  
44  
45  
46  
47 The study recruitment is expected to start from April 2018.  
48  
49

### 50 **VP case development**

#### 51 *VP case selection*

52  
53  
54 We intend to select 10 cases that can best represent the work of rural PHCs. The  
55  
56  
57



1  
2  
3 selection of the VP cases will be based on the following criteria: 1) high frequency of  
4 clinical encounters in the primary care settings in rural areas, and/or 2) association with  
5 significant disease burden; 3) representation of the major areas of work of PHCs in  
6 rural China overall (e.g., public health service delivery, chronic disease management,  
7 infectious disease control, health education, and patient-centered care); and 4)  
8 suitability with USP methodology (e.g., no obvious physiological signs, low risk for  
9 invasive tests) for the sake of criterion validation in the current study. A case selection  
10 committee will be comprised of stakeholders, including physicians, public health  
11 practitioners, policy-makers, and members of the research team. Based on the literature  
12 review, the research team will prepare a list of the 30 most frequently seen conditions in  
13 township health centers and village clinics reported by either community dwellers<sup>24</sup> or  
14 the rural PHC clinicians (Appendix1) for the committee to rate and select.  
15  
16  
17  
18  
19  
20  
21  
22  
23  
24  
25  
26  
27  
28  
29  
30  
31

### 32 *VP case design*

33  
34 The 10 selected VP cases will then be constructed individually by 10 case-specific  
35 development teams (Figure 2). These teams consist of one *condition expert* in the  
36 relevant specialties of a tertiary teaching hospital who will be responsible for drafting  
37 the VP case; an *evidence-synthesis group* involving epidemiologists and  
38 evidence-based researchers who will search and synthesize evidence of the selected  
39 condition for the condition expert to work on; a *clinical consensus group* which  
40 consists of several condition-related clinical experts who will review the  
41 corresponding case from a scientific perspective; an overall all-condition shared  
42 *context-expert panel*, which includes clinicians and health managers from community  
43  
44  
45  
46  
47  
48  
49  
50  
51  
52  
53  
54  
55  
56  
57  
58  
59  
60

1  
2  
3 health centers, township health centers, and village clinics, who will review the  
4 contextual appropriateness of the cases in the rural PHC setting; and a *case*  
5  
6  
7  
8 *coordinator* who will coordinate development of each case.  
9

10 Each VP case will be structured into five domains—medical history, physical  
11 examination, laboratory and imaging studies, diagnosis, and management and  
12 treatment plan—to simulate real-life clinical scenarios.<sup>11 18</sup> The structured VP cases  
13 will have the ability to evaluate the examinee’s performance by each domain and to  
14 aggregate performance scores across conditions. Besides these five condition-related  
15 domains, another practice contextual adjustor will be built into each case to consider  
16 medical resource constraints in rural practices (e.g., availability of basic medical  
17 equipment and medicines).  
18  
19  
20  
21  
22  
23  
24  
25  
26  
27  
28  
29

### 30 *Scoring criteria*

31  
32 Corresponding to each VP case, care quality scoring criteria will be developed. These  
33 criteria include *process quality*, the *accuracy of diagnosis*, and the *appropriateness of*  
34 *the treatment and management plan*.<sup>3 4</sup> Process quality will be evaluated in reference  
35 to a clinical process checklist (to be detailed later) including all necessary questions  
36 that should be asked and physical examinations that should be performed by clinicians,  
37 alongside redundant or even potentially harmful practices. Diagnoses will be rated as  
38 correct, partially correct, or incorrect based on predetermined standards. The  
39 treatment & management plan will be considered appropriate if the clinician  
40 prescribes any of the correct medications or refers the patient to an upper level  
41 physician depending on the VP cases.  
42  
43  
44  
45  
46  
47  
48  
49  
50  
51  
52  
53  
54  
55  
56  
57  
58  
59  
60

1  
2  
3 In addition, *cost of care* and *time-spent per encounter* will also be recorded.  
4  
5  
6 Patient costs will cover medication fees and clinic fees charged per case. In order to  
7  
8 recode clinicians' reaction time to each domain and to impose temporal constraints as  
9  
10 in real clinical practices, the entire clinician-VP interaction process will be timed. This  
11  
12 will include time spent on taking history, conducting physical examinations,  
13  
14 prescribing drugs and treatments, and any interruptions)  
15  
16

17  
18 As for the development of the aforementioned checklist for the predetermined  
19  
20 standards of correctness regarding appropriateness of the treatment and management  
21  
22 plan, a systematic evidence-based approach will be adopted (Appendix 2). Briefly, the  
23  
24 evidence-synthesis group will systematically search and extract condition-specific  
25  
26 checklist items and standards from clinical guidelines, reputable textbooks, and  
27  
28 systematic reviews, etc., in that order, whereas the quality of the evidence will then be  
29  
30 rated by the Appraisal of Guidelines for Research & Evaluation II (AGREE II)<sup>25</sup> or  
31  
32 the revised Quality Assessment of Diagnostic Accuracy Studies (QUADAS-2)  
33  
34 according to its type.<sup>26</sup> Afterwards, the clinical consensus group and the  
35  
36 contextual-expert panel will review and revise initial standards using a Delphi  
37  
38 process.<sup>27</sup>  
39  
40  
41  
42  
43  
44

#### 45 **VP case external review**

46  
47 To validate the content of VP cases, an independent expert panel of physicians,  
48  
49 general practitioners, and rural PHC clinicians who otherwise are not involved in the  
50  
51 study, will be convened to review the cases for content accuracy and appropriateness.  
52  
53  
54 The content validation involves qualitative and quantitative phases. In the qualitative  
55  
56  
57  
58  
59  
60

1  
2  
3  
4 phase, the expert panel will be required to evaluate the cases with respect to the  
5  
6 following: overarching assessment goal, representativeness of the goal and test items  
7  
8 to each domain, the logical relationship of the content tested, and the appropriate  
9  
10 wording, grammar, understandability, and relatedness to the rural PHC context. The  
11  
12 panel will also mention their suggestions, if any, next to each item. Modified VP cases  
13  
14 will then be given back to the expert panel for quantitative evaluation with respect to  
15  
16 their adjustments for simplicity and clarity, as well as necessity and relevance to the  
17  
18 assessment, using a four-point Likert scale ranging from 1 (the lowest) to 4 (the  
19  
20 highest). The content validity index (CVI) will be computed for each domain and for  
21  
22 the entirety of VP cases.<sup>28</sup>

### 23 24 25 26 27 28 **Technical implementation**

29  
30 Revised VP cases will be implemented on *CureFUN*, an existing smartphone- based  
31  
32 training platform using VPs with special customizations and set-ups to suit the  
33  
34 assessment purpose. A live demonstration of a simplified VP can be accessed from  
35  
36 [http://www.curefun.com/zhiqu\\_front/www/experience/experience.html#/caseList](http://www.curefun.com/zhiqu_front/www/experience/experience.html#/caseList) and  
37  
38 is also illustrated in Appendix 3. The smartphone-based VP assessment tool will not  
39  
40 only present interactive clinical scenarios, but also automatically record each  
41  
42 examinee's diagnosis pathway and grade it against the scoring criteria (Figure 33).  
43  
44  
45  
46

### 47 48 **Feasibility study**

49  
50 Before a full-scale validation study, a feasibility study with 30% of the validation  
51  
52 study sample (see study sample section) will be conducted to test the VP assessment  
53  
54 tool's usability, accessibility, and stability, particularly in remote village clinics with  
55  
56  
57

1  
2  
3 weak phone connectivity. Selected clinicians will be instructed to individually attempt  
4  
5 two random VP cases within a given time, using their own smartphone devices from  
6  
7 their workplace. Clinicians without a smartphone will be given a temporary one  
8  
9 installed with the customized *CureFUN* applications. Clinicians' willingness to  
10  
11 participate and adherence to the VP-based tests (e.g., percentage completing VP cases,  
12  
13 score of the assessment, and number of attempts made at each case per person) will be  
14  
15 automatically recorded. Upon completion of the cases, participants will be asked to  
16  
17 fill in a five-point Likert-scale questionnaire regarding their subjective attitude toward  
18  
19 the simulator VP experience (with 1 being the most negative response and 5 being the  
20  
21 most positive), regarding ease of use, experienced assessment process and outcome,  
22  
23 realism, device competence, accessibility, and other general comments. These results  
24  
25 will be used to determine VP cases' face validity, whereby a satisfying score equals  
26  
27 frequency (%) multiplied by positive evaluations; and scores no less than 1.5 are  
28  
29 considered acceptable.<sup>29</sup>

### 37 **Validation of VP as a quality assessment tool**

#### 38 *Study design*

39  
40 The prospective validation study is a nationwide multicenter study with two main  
41  
42 functions. This study will 1) assess the criterion validity of the VP-tool in assessing  
43  
44 the quality of primary health care, by analyzing its measurement concordance against  
45  
46 the quality of primary health care, by analyzing its measurement concordance against  
47  
48 the standard USP measure, and 2) test the reliability of the VP tool, by examining its  
49  
50 internal consistency and the stability of repeated VP assessments on the same  
51  
52 examinees.  
53  
54  
55  
56

### *Study sample*

From each of our seven sample provinces, two counties will be selected with sufficient variations in socio-economic conditions, demographics, and disease burdens between them while also approximating the provincial condition in general. Within each county, the government registry of all township health centers and village clinics will serve as our sampling frame, which will include 1) licensed practicing physicians, 2) clinicians who have not been licensed but are providing clinical services under the supervision of licensed physicians at township health centers, as well as 3) full- or part-time village clinicians. Temporarily-visiting clinicians (often senior clinicians sent by higher level medical institutions to support the development of township health centers), nurses, and allied health workers without prescription privileges will be excluded.

The sample size calculation is based on individual VP/USP-clinician encounter, and ensures sufficient power to detect variations at individual case level per county. For village clinics, one VP/USP case will be examined per time to minimize the detection of USPs. Assuming a 5% type I error and 80% power, to determine whether a moderate concordance correlation coefficient<sup>30</sup> of 0.90<sup>31</sup> between VP and USP differs from zero, seven paired VP/USP-clinician encounters will be required for each of the 10 cases per county. As a stratified sampling strategy will be deployed that first samples townships and then villages from each township, the design effect should be taken into consideration when calculating the sample size. Assuming an intra-class correlation of 0.05 and 6 village clinics per township, then 9 paired VP/USP-clinician

1  
2  
3 encounters is needed. These nine paired VP/USP-clinician encounters will be assigned  
4  
5  
6 to 3 township health centers and 6 village clinics using probability proportional to size  
7  
8 (PPS) method. These 9 paired VP/USP-clinician encounters will be assigned to  
9  
10 township health centers and village clinics based on the ratio of the total number of  
11  
12 clinicians at township health centers over the total number of village clinicians for  
13  
14 each county. There are 1260 VP/USP-clinician encounters across our seven study  
15  
16 provinces for all 10 VP cases. Figure 4 shows the sampling process and study flow for  
17  
18 one VP case using Guizhou Province (Danzhai County) as a demonstration.  
19  
20  
21

### 22 *Criterion validity*

23  
24  
25 Criterion validity<sup>32</sup> of the VP to assess quality of care will be evaluated mainly by its  
26  
27 measurement concordance against the USP measure as the recognized gold standard<sup>33</sup>  
28  
29 for assessing quality of care in real practice. The USPs will be developed in a related  
30  
31 study, sharing the development teams for VP and a similar development process. The  
32  
33 method of fielding USPs in rural China will follow approaches similar to those of the  
34  
35 previous USP study in rural China.<sup>3</sup> Identical quality scoring criteria, described above,  
36  
37 will be applied to scores. Each selected clinician will first see a USP (to avoid the  
38  
39 practice effect due to the USP's unannounced feature), and then complete a  
40  
41 smartphone-based VP assessment of the same condition. The clinician to be assessed  
42  
43 will be randomly selected onsite by the USP from any on-duty clinicians on the day of  
44  
45 the USP visit to the sampled township health center and village clinics. This situation  
46  
47 would especially apply to township health centers, as most village clinics have only  
48  
49 one clinician (note: Chinese patients normally see their primary care clinicians as a  
50  
51  
52  
53  
54  
55  
56  
57  
58  
59  
60

1  
2  
3 walk-in patient and appointments are seldom needed). To record USP-clinician  
4 interactions, USPs will complete checklists immediately after their visit, as well as  
5  
6 retain the medication prescription and the fee charge slips by the clinician. A week  
7  
8 after the USP clinic visit, clinicians will be assigned a smartphone-based VP  
9  
10 assessment, which will consist of a demonstration VP case to allow the clinician  
11  
12 getting familiar with the operation system, and the examination VP case of the same  
13  
14 USP condition. The VP-clinician interactions, drugs dispensed, and fees charged will  
15  
16 all be recorded automatically by the online assessment system.  
17  
18  
19  
20  
21  
22

23 The concordance of the two assessments between USPs and VPs will then be  
24  
25 analyzed by Lin's concordance correlation coefficient ( $r_c$ )<sup>30</sup> for continuous *process*  
26  
27 *quality* scores, *fees charged* (yuan), and *time spent* (min), and the Kappa statistic<sup>34</sup> for  
28  
29 dichotomous *diagnoses* and *treatment & management* measures.  $r_c$  evaluates how  
30  
31 close pairs of observation fell on a 45° line (the perfect concordance line) through the  
32  
33 origin in addition to their correlation. Kappa measures agreement in assessment beyond  
34  
35 what is expected by chance alone. In addition, for continuous measures, a  
36  
37 Bland-Altman plot will also be used to visualize the concordance.<sup>35 36</sup> For dichotomous  
38  
39 measures, we will analyze their sensitivity (i.e., strength to detect correct diagnosis,  
40  
41 treatment plan, etc.) and specificity (i.e., strength to detect incorrect diagnosis,  
42  
43 treatment plan, etc.) using USP as the reference.  
44  
45  
46  
47  
48  
49

### 50 *Reliability*

51  
52 To establish *test-retest reliability*, clinicians previously being assessed by VPs will be  
53  
54 instructed to retake the same VP tests four weeks after their last assessment. The  
55  
56  
57  
58  
59  
60



1  
2  
3 second VP test is set one month later than the first to reduce the practice effect,<sup>37</sup>  
4  
5 assuming the clinician's general medical knowledge remains constant.<sup>32</sup> The  
6  
7 concordance of the two repeated tests indicate the stability of the VP assessment  
8  
9 tool.<sup>32</sup> Similar concordance measures (i.e.,  $r_c$  for continuous and Kappa for  
10  
11 dichotomous measures) as described above will be used. The *internal consistency*, the  
12  
13 intercorrelation of scores for process quality indicators, will be computed by  
14  
15 Cronbach's alpha coefficients ( $\alpha$ ),<sup>38</sup> with  $\alpha > 0.7$  representing acceptable reliability.<sup>39</sup>  
16  
17 Table 2 summarizes the validity, reliability, and feasibility measures that will be  
18  
19 examined in our study.  
20  
21  
22  
23  
24

### 25 **Patient and public involvement**

26  
27 We will seek feedback from clinicians and patient representatives in the feasibility  
28  
29 study and use their feedback to refine the VP cases. Our USPs are also lay people  
30  
31 trained to portray patients and assess care quality based on their interactions with  
32  
33 clinicians. Our scoring criteria thus are also patient centered. Furthermore, all  
34  
35 participants will be acknowledged for their involvement in the study and will be  
36  
37 provided with a final summary report of the study outcomes, as well as have free  
38  
39 access to the VP training website. All published results will be publicly available.  
40  
41  
42  
43  
44

### 45 **ETHICS AND DISSEMINATION**

46  
47 The study has been approved by the Institutional Review Board of the School of  
48  
49 Public Health (IRB), Sun Yat-sen University (No. 2017-007). Informed consent will  
50  
51 be obtained from all participating clinicians of VP tests. However, to reduce  
52  
53 participation bias due to self-selection,<sup>40</sup> our IRB has approved the implementation of  
54  
55  
56  
57  
58  
59  
60

1  
2  
3  
4 USP without prior informed consent from the individual participants, on the condition  
5  
6 that involved clinicians will be fully de-identified and all analyses will only be  
7  
8 conducted at the population level.<sup>40</sup> Study data will be securely stored and only  
9  
10 de-identified information will be used for analysis. We will seek peer-reviewed  
11  
12 publications for study findings and produce reports to inform health authorities. The  
13  
14 tools and technology developed in this study will be freely available to other LMICs  
15  
16 for research purposes.  
17  
18  
19

## 20 DISCUSSION

21  
22  
23 To the best of our knowledge, this is the first study validating VP as a quality  
24  
25 assessment tool in rural primary health care centers. This study follows an  
26  
27 evidence-based approach to develop VP cases and scoring criteria, implements them  
28  
29 on a widely accessible platform (i.e., a smartphone), and systematically validates the  
30  
31 VP assessment tool via a cross-national multicenter study representing rural PHCs  
32  
33 over a wide range of geographic areas with distinct life expectancies and economic  
34  
35 development levels. The VP assessment tool's accessibility, flexibility and scalability  
36  
37 give it good potential to be easily adapted to other LMICs.  
38  
39  
40  
41

42  
43 VP has mainly been used in medical education to train and test critical thinking<sup>18</sup>  
44  
45<sup>41 42</sup>, and only till recently few studies start to extend its usage into practice setting to  
46  
47 change health provider behavior and improve care quality.<sup>43 44</sup> As a further extension,  
48  
49 our study proposes to validate VP as a quality assessment tool via widely accessible  
50  
51 smartphones. Nevertheless, it is to be noted that given its simulated nature, the  
52  
53 VP-test theoretically may never completely bridge the 'competency-practice' gap. The  
54  
55  
56  
57  
58  
59  
60

1  
2  
3 validation study is thus essential to quantify the concordance/discordance between  
4  
5  
6 VP- and USP-based quality assessments. Our study will generate firsthand empirical  
7  
8 evidence contributing to the understanding of the ‘know-do gap’,<sup>5 45</sup> and further shed  
9  
10 light on circumstances that cannot be tested by USPs.  
11  
12

13 A limitation of the study, however, is that, in order to test the validity of VP  
14  
15 against USP as the reference standard, we restrict the selection of VP cases to those  
16  
17 that can be simulated by USP as well. This conservative first step will nevertheless  
18  
19 allow us to examine the extent to which VP can reflect care quality, and follow-up  
20  
21 study will then explore the full potential of the VP in assessing quality of care. Further,  
22  
23 the two purposely-selected counties for each province may not represent the  
24  
25 provincial conditions entirely, although we will make every effort to consider  
26  
27 provincial representation when selecting counties. Third, while the validation study is  
28  
29 exclusively conducted on PHCs in rural China, the extent to which the VP assessment  
30  
31 tool can be transported to other LMICs remains to be evaluated. Even so, the selected  
32  
33 provinces from the ‘five-Chinas’ may improve the generalizability of our study  
34  
35 considering the comparable life expectancies of LMICs and these provinces.  
36  
37  
38  
39  
40  
41

#### 42 Author’s contributions

43  
44 All authors contributed to the conceptualization and design of the study. DX, JL, and  
45  
46 YYC conceived the initial study design, analytical methods, and composition of the  
47  
48 team. JL was responsible for the study concept, initial draft, and revisions. DX was  
49  
50 responsible for the study concept and revising the draft. YLC and XHW were  
51  
52 responsible for the development of the scoring criteria. SS, KH, HW, JNW, ZLZ, ZN,  
53  
54  
55  
56  
57  
58  
59  
60

1  
2  
3 WJG, JP, CXT and WZ provided critical review and revision to the study design. All  
4  
5  
6 authors read and approved the final revision.  
7

#### 8 9 Funding

10  
11 The study is supported by the China Medical Board through its Health Policy and  
12  
13 Systems Sciences Open Competition grant ‘Quality in primary health care: using  
14  
15 unannounced standardized patients’ (grant No.: CMB16-260, XD, PI).  
16  
17

#### 18 Acknowledgement

19  
20 The study will be led by the Sun Yat-sen Global Health Institute of Sun Yat-sen  
21  
22 University with a consortium of researchers from seven other Chinese universities,  
23  
24 including Central South University, Guangzhou University, Guizhou Medical  
25  
26 University, Inner Mongolia Medical University, Lanzhou University, Sichuan  
27  
28 University, and Xi’an Jiaotong University. We thank all the students from these  
29  
30 universities who have contributed to our project, especially Wenjun He who produced  
31  
32 Figure 1, Jianjian Wang who assisted with the evidence collection of the Scoring  
33  
34 Criteria, and Ash Harris who contributed to the VP computerization.  
35  
36  
37  
38  
39

#### 40 Competing interests

41  
42 The development of the VP assessment tool is a joint project of the Sun Yat-sen  
43  
44 University Global Health Institute (SGHI) (representing the seven universities in  
45  
46 China), and *CureFUN*. However, the VP cases will be independently developed and  
47  
48 the validation studies will be rigorously conducted by the research team from SGHI  
49  
50 and the seven universities, whereas *CureFun* will technically implement the cases on  
51  
52 smartphones and have no influence over the study design and analysis.  
53  
54  
55  
56  
57

## REFERENCES

1. Kieny MP, Evans DB. Universal health coverage. *East Mediterr Health J* 2013;19(4):305-6.
2. Transforming our world: the 2030 Agenda for Sustainable Development. : United Nations- Sustainable Development Knowledge Platform, 2015.
3. Sylvia S, Shi Y, Xue H, et al. Survey using incognito standardized patients shows poor quality care in China's rural clinics. *Health Policy and Planning* 2014;30(3):322-33.
4. Das J, Holla A, Das V, et al. In urban and rural India, a standardized patient study showed low levels of provider training and huge quality gaps. *Health Affairs* 2012;31(12):2774-84.
5. Das J, Hammer J, Leonard K. The quality of medical advice in low-income countries. *The Journal of Economic Perspectives* 2008;22(2):93-114.
6. Sylvia S, Xue H, Zhou C, et al. Tuberculosis detection and the challenges of integrated care in rural China: A cross-sectional standardized patient study. *PLoS Medicine* 2017;14(10):e1002405.
7. Hanefeld J, Powell-Jackson T, Balabanova D. Understanding and measuring quality of care: dealing with complexity. *Bulletin of the World Health Organization* 2017;95(5):368.
8. Donabedian A. Evaluating the quality of medical care. *The Milbank Quarterly* 2005;83(4):691-729.
9. Peabody JW, Luck J, Glassman P, et al. Comparison of vignettes,

1  
2  
3  
4 standardized patients, and chart abstraction: a prospective validation study of  
5  
6 3 methods for measuring quality. *JAMA* 2000;283(13):1715-22.

7  
8 10. Shah R, Edgar D, Evans BJ. Measuring clinical practice. *Ophthalmic and*  
9  
10  
11 *Physiological Optics* 2007;27(2):113-25.

12  
13 11. Glassman PA, Luck J, O'Gara EM, et al. Using standardized patients to  
14  
15 measure quality: evidence from the literature and a prospective study. *The*  
16  
17 *Joint Commission journal on quality improvement* 2000;26(11):644-53.

18  
19 12. Collins J, Harden R. The Use of Real Patients, Simulated Patients and  
20  
21 Simulators in Clinical Examinations Association for Medical Education in  
22  
23 Europe (AMEE) Guide, 2004.

24  
25 13. Triola M, Feldman H, Kalet AL, et al. A randomized trial of teaching clinical  
26  
27 skills using virtual and live standardized patients. *Journal General Internal*  
28  
29 *Medicine* 2006;21(5):424-9.

30  
31 14. Peabody JW, Luck J, Glassman P, et al. Measuring the quality of physician  
32  
33 practice by using clinical vignettes: a prospective validation study. *Annals of*  
34  
35 *Internal Medicine* 2004;141(10):771-80.

36  
37 15. Shah R, Edgar DF, Evans BJ. A comparison of standardised patients,  
38  
39 record abstraction and clinical vignettes for the purpose of measuring clinical  
40  
41 practice. *Ophthalmic and Physiological Optics* 2010;30(3):209-24.

42  
43 16. Dresselhaus TR, Peabody JW, Luck J, et al. An evaluation of vignettes for  
44  
45 predicting variation in the quality of preventive care. *Journal of general internal*  
46  
47 *medicine* 2004;19(10):1013-18.

- 1  
2  
3  
4 17. Ellaway R, Candler C, Greene P, et al. An architectural model for  
5  
6 MedBiquitous virtual patients. Baltimore: MedBiquitous, 2006.  
7
- 8  
9 18. Cook DA, Triola MM. Virtual patients: a critical literature review and  
10  
11 proposed next steps. *Med Educ* 2009;43(4):303-11. doi:  
12  
13 10.1111/j.1365-2923.2008.03286.x [published Online First: 2009/04/02]  
14  
15
- 16 19. Zhou M, Wang H, Zhu J, et al. Cause-specific mortality for 240 causes in  
17  
18 China during 1990–2013: a systematic subnational analysis for the Global  
19  
20 Burden of Disease Study 2013. *The Lancet* 2016;387(10015):251-72.  
21  
22
- 23 20. Babiarz KS, Miller G, Yi H, et al. China's new cooperative medical scheme  
24  
25 improved finances of township health centers but not the number of patients  
26  
27 served. *Health Affairs* 2012;31(5):1065-74.  
28  
29
- 30 21. Li X, Lu J, Hu S, et al. The primary health-care system in China. *The*  
31  
32 *Lancet* 2017;390(10112):2584-94.  
33  
34
- 35 22. Qian D, Pong RW, Yin A, et al. Determinants of health care demand in  
36  
37 poor, rural China: the case of Gansu Province. *Health Policy and Planning*  
38  
39 2009;24(5):324-34.  
40  
41
- 42 23. Yip WC, Wang H, Liu Y. Determinants of patient choice of medical provider:  
43  
44 a case study in rural China. *Health Policy and Planning* 1998;13(3):311-22.  
45  
46
- 47 24. An Analysis Report of National Health Services Survey in China. Beijing:  
48  
49 Center for Health Statistics and Information, NHFPC, 2013.  
50  
51
- 52 25. Brouwers MC, Kho ME, Browman GP, et al. AGREE II: advancing  
53  
54 guideline development, reporting and evaluation in health care. *Canadian*  
55  
56

1  
2  
3  
4  
5  
6  
7  
8  
9  
10  
11  
12  
13  
14  
15  
16  
17  
18  
19  
20  
21  
22  
23  
24  
25  
26  
27  
28  
29  
30  
31  
32  
33  
34  
35  
36  
37  
38  
39  
40  
41  
42  
43  
44  
45  
46  
47  
48  
49  
50  
51  
52  
53  
54  
55  
56  
57  
58  
59  
60

*Medical Association Journal* 2010;182(18):E839-E42.

26. Whiting PF, Rutjes AW, Westwood ME, et al. QUADAS-2: a revised tool for the quality assessment of diagnostic accuracy studies. *Annals of Internal Medicine* 2011;155(8):529-36.

27. Hsu CC, Sandford BA. The Delphi Technique: Making Sense Of Consensus. *Practical Assessment Research & Evaluation* 2007;26(10):289–304.

28. Zamanzadeh V, Ghahramanian A, Rassouli M, et al. Design and implementation content validity study: development of an instrument for measuring patient-centered communication. *Journal of Caring Sciences* 2015;4(2):165.

29. Lacasse Y, Godbout C, Series F. Health-related quality of life in obstructive sleep apnoea. *European Respiratory Journal* 2002;19(3):499-503.

30. Lawrence I, Lin K. A concordance correlation coefficient to evaluate reproducibility. *Biometrics* 1989:255-68.

31. McBride G. A proposal for strength-of-agreement criteria for Lin's concordance correlation coefficient. NIWA Client Report: HAM2005-062: Hamilton: National Institute of Water & Atmospheric Research, Ltd (NZ), 2005.

32. Kimberlin CL, Winetrstein AG. Validity and reliability of measurement instruments used in research. *American Journal of Health-System Pharmacy* 2008;65(23)

33. Rethans JJ, Gorter S, Bokken L, et al. Unannounced standardised patients



1  
2  
3 in real practice: a systematic literature review. *Medical Education*  
4  
5  
6 2007;41(6):537-49.

7  
8 34. Cohen J. A coefficient of agreement for nominal scales. *Educational and*  
9  
10  
11 *Psychological Measurement* 1960;20(1):37-46.

12  
13 35. Kwicien R, Koppschneider A, Blettner M. Concordance analysis: part 16  
14  
15 of a series on evaluation of scientific publications. *Deutsches Ärzteblatt*  
16  
17  
18 *International* 2011;108(30):515.

19  
20 36. Bland JM, Altman DG. Statistical methods for assessing agreement  
21  
22 between two methods of clinical measurement. *Lancet*  
23  
24  
25 1986;327(8476):307-10.

26  
27 37. McCabe D, Langer KG, Borod JC, et al. Practice Effects. In: Kreutzer JS,  
28  
29 DeLuca J, Caplan B, eds. *Encyclopedia of Clinical Neuropsychology*. New  
30  
31  
32 York: Springer 2011:1988-89.

33  
34 38. Cronbach LJ. Coefficient alpha and the internal structure of tests.  
35  
36  
37 *Psychometrika* 1951;16(3):297-334.

38  
39 39. DeVellis RF. *Scale development: Theory and applications*. Los Angeles:  
40  
41  
42 Sage 2012:109-10.

43  
44 40. Rhodes KV, Miller FG. *Simulated Patient Studies: An Ethical Analysis*.  
45  
46  
47 *Milbank Quarterly* 2012;90(4):706-24.

48  
49 41. Reliability of a virtual patient simulation as an assessment tool.

50  
51  
52 PHARMACOTHERAPY; 2017. WILEY 111 RIVER ST, HOBOKEN  
53  
54  
55 07030-5774, NJ USA.

1  
2  
3  
4 42. Urrestigundlach M, Tolks D, Kiessling C, et al. Do virtual patients prepare  
5  
6 medical students for the real world? Development and application of a  
7  
8 framework to compare a virtual patient collection with population data. *Bmc*  
9  
10  
11 *Medical Education* 2017;17(1):174.

12  
13 43. Blok AC, May CN, Sadasivam RS, et al. Virtual Patient Technology:  
14  
15 Engaging Primary Care in Quality Improvement Innovations. *Jmir Medical*  
16  
17 *Education* 2017;3(1):e3.

18  
19  
20 44. Mollica R, Lavelle J, Fors U, et al. Using the Virtual Patient to Improve the  
21  
22 Primary Care of Traumatized Refugees. *Journal of Medical Education*  
23  
24 2017;16(1)

25  
26  
27 45. Mohanan M, Vera-Hernández M, Das V, et al. The know-do gap in quality  
28  
29 of health care for childhood diarrhea and pneumonia in rural India. *JAMA*  
30  
31 *Pediatrics* 2015;169(4):349-57.  
32  
33  
34  
35  
36  
37  
38  
39  
40  
41  
42  
43  
44  
45  
46  
47  
48  
49  
50  
51  
52  
53  
54  
55  
56  
57  
58  
59  
60

1  
2  
3  
4  
5  
6  
7  
8  
9  
10  
11  
12  
13  
14  
15  
16  
17  
18  
19  
20  
21  
22  
23  
24  
25  
26  
27  
28  
29  
30  
31  
32  
33  
34  
35  
36  
37  
38  
39  
40  
41  
42  
43  
44  
45  
46  
47  
48  
49  
50  
51  
52  
53  
54  
55  
56  
57  
58  
59  
60

Figure 1. Seven sample provinces in China referencing countries of equivalent life expectancy in parentheses. (LE: life expectancy)

For peer review only

Figure 2. VP case development team role and responsibilities. (VP: virtual patient)

For peer review only

1  
2  
3  
4  
5  
6  
7  
8  
9  
10  
11  
12  
13  
14  
15  
16  
17  
18  
19  
20  
21  
22  
23  
24  
25  
26  
27  
28  
29  
30  
31  
32  
33  
34  
35  
36  
37  
38  
39  
40  
41  
42  
43  
44  
45  
46  
47  
48  
49  
50  
51  
52  
53  
54  
55  
56  
57  
58  
59  
60

Figure 3. Main components of smartphone-based VP program. (VP: virtual patient)

For peer review only

1  
2  
3  
4 Figure 4. Sampling and study process for one VP case in Danzhai County, Guizhou Province  
5 (THC: township health center; VC: village clinic)  
6  
7  
8  
9  
10  
11  
12  
13  
14  
15  
16  
17  
18  
19  
20  
21  
22  
23  
24  
25  
26  
27  
28  
29  
30  
31  
32  
33  
34  
35  
36  
37  
38  
39  
40  
41  
42  
43  
44  
45  
46  
47  
48  
49  
50  
51  
52  
53  
54  
55  
56  
57  
58  
59  
60

For peer review only

Table 1. The strengths and limitations of methods to assess care quality.

| Process Measure of Quality             | Strengths                                                                                                                                                                                 | Limitations                                                                                                   | Assessment Level                                                                              |
|----------------------------------------|-------------------------------------------------------------------------------------------------------------------------------------------------------------------------------------------|---------------------------------------------------------------------------------------------------------------|-----------------------------------------------------------------------------------------------|
| Unannounced Standardized Patient (USP) | Standardized, controlling for case-mix and patient-mix;<br>Unannounced, no Hawthorne effect (if not be detected);<br>Reduced recall bias                                                  | Expensive<br>Limited medical conditions<br>First-visit bias<br>Selection bias if informed consent is required | <b>Action (Do)</b><br><b>Gold standard</b>                                                    |
| Clinical Vignettes                     | Cost-effective;<br>Suitable for large scale and cross-system comparison;<br>Covering all illnesses;<br>Accounting for case-mix and patient-mix.                                           | Hawthorne effect<br>Selection bias                                                                            | <b>Competence (Know how)</b><br><b>Over-estimating</b> care quality (best answers) or similar |
| Virtual Patients (VP)                  | Interactive<br>Real-time response & automatic record<br>Highly standardized<br>Scalability & low marginal cost<br>Efficient delivery: anytime, anywhere<br>Suitable for large scale study | Hawthorne effect<br>Selection bias<br>High cost in initial development                                        | <b>Performance (Show how)</b><br>?                                                            |

Table 2. Main validation domains of the study.

| Domain                  | Indicator                                                      | Data collection   |                                                                                                                                                                                                                                                       | Statistical analysis                                                                                                                                                                                                                                                                   |
|-------------------------|----------------------------------------------------------------|-------------------|-------------------------------------------------------------------------------------------------------------------------------------------------------------------------------------------------------------------------------------------------------|----------------------------------------------------------------------------------------------------------------------------------------------------------------------------------------------------------------------------------------------------------------------------------------|
|                         |                                                                | Phase             | Method                                                                                                                                                                                                                                                |                                                                                                                                                                                                                                                                                        |
| Content validity        | Content validity index (CVI)                                   | VP case review    | Evaluations by an expert panel after reviewing VP cases, measured by a 4-point Likert scale (1=lowest, 4=highest).                                                                                                                                    | CVI for VP case and for specific VP domain will be computed, where CVI = number of raters giving a rating of 3 or 4 divided by the total number of raters.                                                                                                                             |
| Feasibility             | Willingness to participate; Adherence rate                     | Feasibility study | The subsample of clinicians' interactions with the 2 VP cases will be recorded by the online assessment                                                                                                                                               | Willingness to participate = clinicians taking the VP tests divided by the percentage of clinician selected<br>Adherence rate = clinicians completed 2 VP cases divided by the percentage of clinicians taking VP tests                                                                |
|                         |                                                                |                   | Clinicians' subjective attitude toward the VP test experience measured by a 5-point Likert scale (1=most negative, 5=most positive).                                                                                                                  | Satisfying score for VP case and for specific aspects (e.g., usability, accessibility, etc.) will be computed, where satisfying score = frequency multiply by positive evaluations (3 to 5), and scores $\geq 1.5$ are considered acceptable.                                          |
| Face validity           | Satisfying score                                               |                   |                                                                                                                                                                                                                                                       |                                                                                                                                                                                                                                                                                        |
| Criterion validity      | Concordance correlation coefficient ( $r_c$ ); Kappa statistic | Validation study  | The same clinician receives a USP visit and a VP test for a matching condition. The USP-clinician interaction is evaluated by the USP using the checklist, including fees and time per visit; while VP-clinician interaction is graded by the system. | The concordance of VP-test scores against USP-test score (gold standard) or two-repeated VP-tests will be examined by $r_c$ for continuous process quality scores, fees charged (yuan), and time spent (min); and Kappa for dichotomous diagnoses and treatment & management measures. |
|                         |                                                                |                   | Repeat VP-tests on the same clinician in a month                                                                                                                                                                                                      |                                                                                                                                                                                                                                                                                        |
| Test-retest Reliability |                                                                |                   |                                                                                                                                                                                                                                                       |                                                                                                                                                                                                                                                                                        |
| Internal consistency    | Cronbach's alpha coefficient ( $\alpha$ )                      |                   | VP-test scores on a single occasion                                                                                                                                                                                                                   | Intercorrelation of scores for process quality indicators with alpha $> 0.7$ is acceptable.                                                                                                                                                                                            |



1  
2  
3  
4  
5  
6  
7  
8  
9  
10  
11  
12  
13  
14  
15  
16  
17  
18  
19  
20  
21  
22  
23  
24  
25  
26  
27  
28  
29  
30  
31  
32  
33  
34  
35  
36  
37  
38  
39  
40  
41  
42  
43  
44  
45  
46  
47  
48  
49  
50  
51  
52  
53  
54  
55  
56  
57  
58  
59  
60



Figure 1. Seven sample provinces in China referencing countries of equivalent life expectancy in parentheses.

133x98mm (300 x 300 DPI)

www only

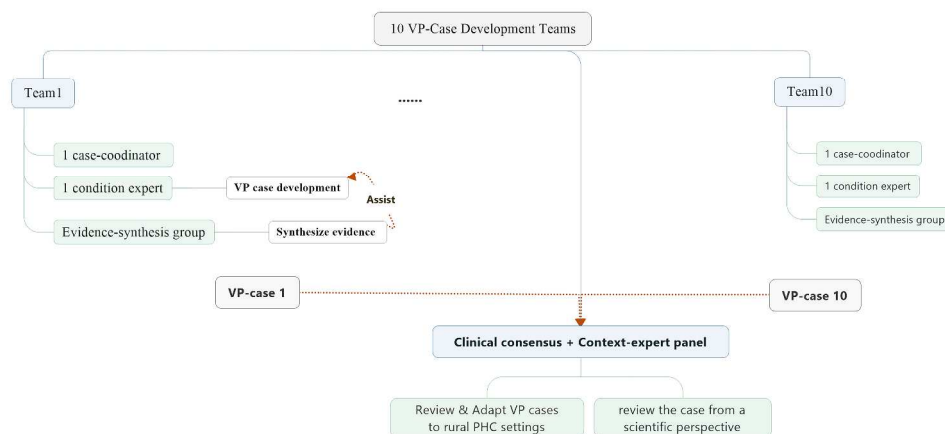

Figure 2. VP case development team role and responsibilities.

654x317mm (300 x 300 DPI)

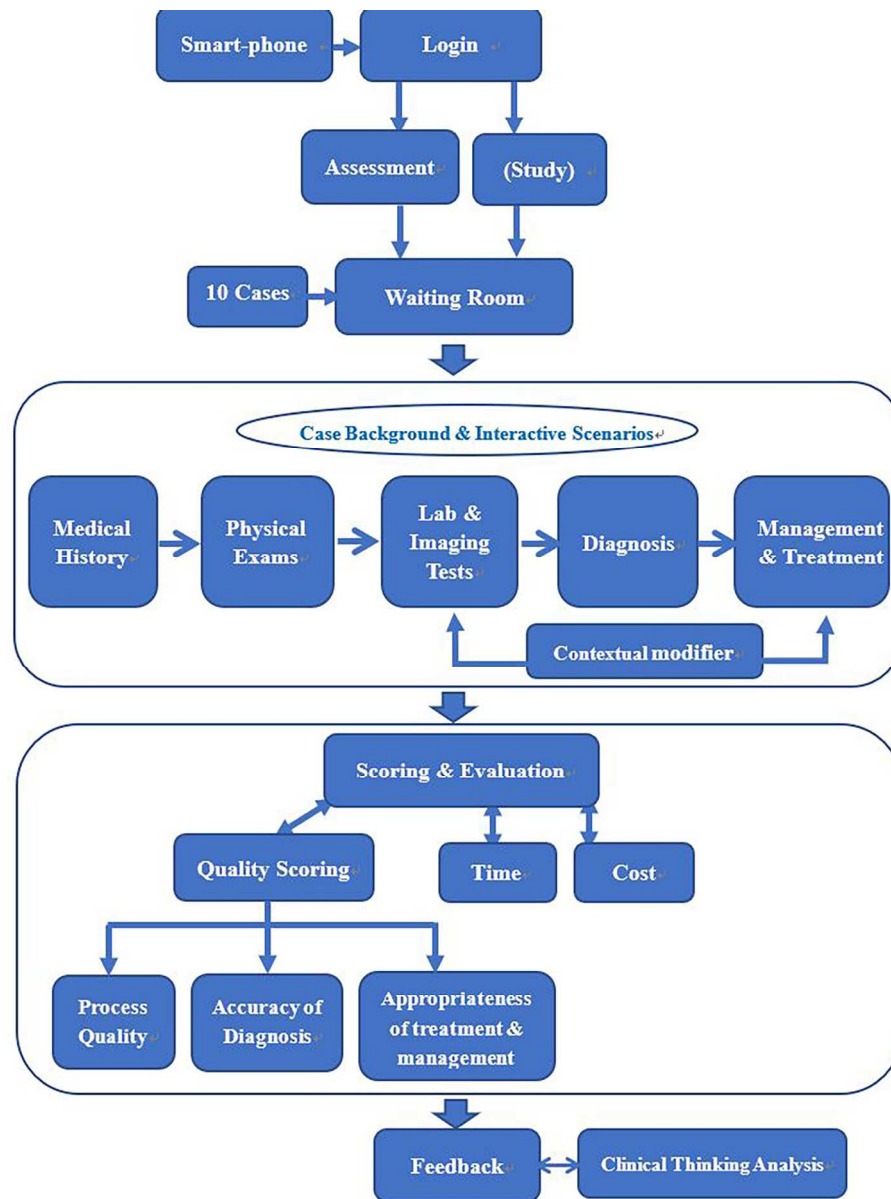

45 Figure 3. Main components of smartphone-based VP program. (VP: virtual patient)

46 158x203mm (300 x 300 DPI)

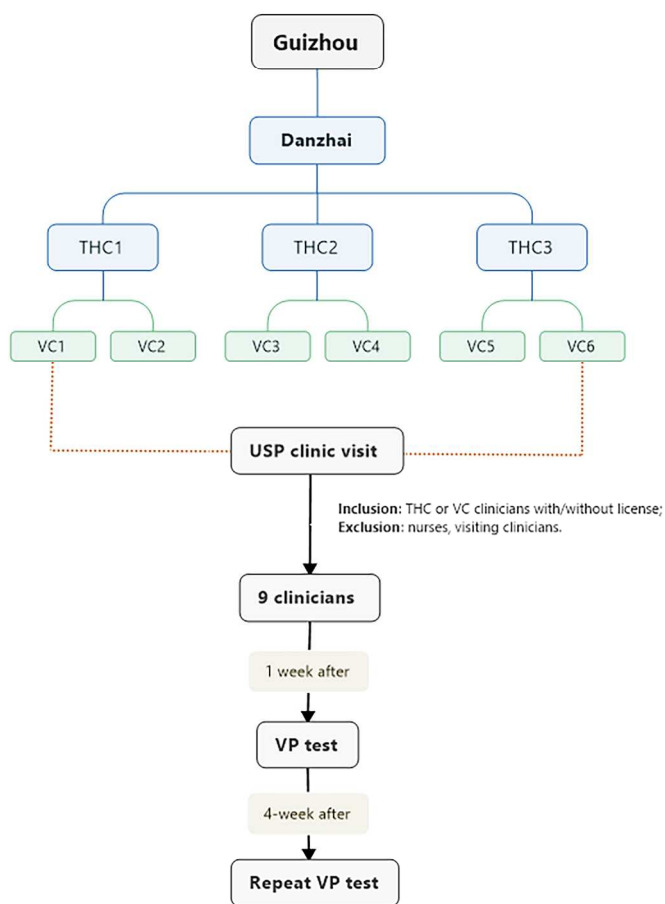

Figure 4. Sampling and study process for one VP case in Danzhai County, Guizhou Province (THC: township health center; VC: village clinic)

275x269mm (300 x 300 DPI)

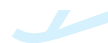

Appendix 1. Top 30 conditions of high-frequency clinical encounters in primary health care settings in rural China.

| Clinical condition          | Two-week consultation constituent ratio <sup>1</sup> |      | Township health center <sup>2</sup> |       | Village clinics <sup>2</sup> |       |
|-----------------------------|------------------------------------------------------|------|-------------------------------------|-------|------------------------------|-------|
|                             | RANK                                                 | %    | RANK                                | %     | RANK                         | %     |
| Cold                        | <b>1</b>                                             | 28   | <b>1</b>                            | 13.60 | <b>1</b>                     | 19.50 |
| Hypertension                | <b>2</b>                                             | 21.8 | <b>4</b>                            | 7.90  | <b>6</b>                     | 9.80  |
| Diabetes mellitus           | <b>4</b>                                             | 3.9  | <b>7</b>                            | 4.60  | <b>8</b>                     | 4.60  |
| Chronic tracheitis          | <b>8</b>                                             | 2    | <b>2</b>                            | 9.50  | <b>4</b>                     | 10.50 |
| Acute tracheitis            |                                                      |      | <b>3</b>                            | 9.00  | <b>3</b>                     | 10.70 |
| Gastritis                   | <b>3</b>                                             | 5.5  | <b>5</b>                            | 7.50  | <b>5</b>                     | 10.30 |
| Diarrhea                    |                                                      |      | <b>6</b>                            | 5.30  | <b>2</b>                     | 11.70 |
| Urinary tract infection     |                                                      |      | <b>8</b>                            | 4.50  | <b>9</b>                     | 2.90  |
| Osteoarthritis              | <b>7</b>                                             | 2.30 | <b>17</b>                           | 2.40  | <b>18</b>                    | 0.50  |
| Low back pain               | <b>5</b>                                             | 3.10 | <b>16</b>                           | 2.50  | <b>15</b>                    | 0.80  |
| Psoatic strain              |                                                      |      | <b>14</b>                           | 2.60  | <b>14</b>                    | 0.80  |
| Peptic ulcer                |                                                      |      | <b>11</b>                           | 2.90  | <b>11</b>                    | 1.70  |
| General trauma              |                                                      |      | <b>10</b>                           | 3.10  | <b>13</b>                    | 1.10  |
| Sciatica                    |                                                      |      | <b>19</b>                           | 1.80  | <b>22</b>                    | 0.30  |
| Child dyspepsia             |                                                      |      | <b>9</b>                            | 3.20  | <b>7</b>                     | 7.00  |
| Pelvic inflammatory disease |                                                      |      | <b>12</b>                           | 2.70  | <b>16</b>                    | 0.60  |
| Vaginitis                   |                                                      |      | <b>13</b>                           | 2.70  | <b>17</b>                    | 0.50  |
| Dysmenorrhoea               |                                                      |      | <b>18</b>                           | 2.30  | <b>19</b>                    | 0.50  |
| Cholecystitis               |                                                      |      | <b>15</b>                           | 2.60  | <b>12</b>                    | 1.60  |
| Toothache                   | <b>10</b>                                            | 1.30 | <b>22</b>                           | 1.30  | <b>10</b>                    | 2.70  |
| Menopausal syndrome         |                                                      |      | <b>21</b>                           | 1.40  | <b>27</b>                    | 0.10  |
| Cholelithiasis              |                                                      |      | <b>20</b>                           | 1.60  | <b>20</b>                    | 0.40  |
| Idiopathic headache         | <b>6</b>                                             | 2.50 | <b>25</b>                           | 0.60  | <b>25</b>                    | 0.20  |
| Hemorrhoids                 |                                                      |      | <b>23</b>                           | 1.10  | <b>21</b>                    | 0.40  |
| Asthma                      |                                                      |      | <b>28</b>                           | 0.60  | <b>26</b>                    | 0.20  |
| Chronic dermatitis          |                                                      |      | <b>29</b>                           | 0.20  | <b>29</b>                    | 0.10  |
| Tympanitis                  |                                                      |      | <b>24</b>                           | 0.70  | <b>24</b>                    | 0.20  |
| Conjunctivitis              |                                                      |      | <b>27</b>                           | 0.60  | <b>28</b>                    | 0.10  |
| Sinusitis                   |                                                      |      | <b>26</b>                           | 0.60  | <b>23</b>                    | 0.30  |
| Ischemic heart disease      | <b>9</b>                                             | 1.5  |                                     |       |                              |       |

<sup>1</sup> Self-reported two-week consultation constituent ratio by community dwellers, information from the 2013 National Health Service Survey in China.

<sup>2</sup> Clinicians reported common clinical conditions in primary health care centers by centers' type.

## Appendix 2. Methods for checklist and standards development

To evaluate the quality of care in primary health care institutions, key diagnosis and treatment points of common and frequently-occurring diseases will be developed. The *WHO Handbook for Guideline Development* and evidence-based evaluation principles will be adopted. The main procedures are comprised in the following six steps that will be implemented.

1. Expert group recruitment: Convene a multidisciplinary group consisting of experts in public health, evidence-based medicine/document retrieval, as well as clinical physicians.
2. Data retrieval and literature evaluation: Employ a 5S model to retrieve and incorporate clinical practice guidelines, textbooks, systematic reviews, meta-analysis, and important literature reviews. Retrieve literature from Wanfang, Medlive, MEDLINE, National Guideline Clearinghouse (NGC), National Institute for Health and Care Excellence (NICE), World Health Organization (WHO), DynaMed, and UpToDate. Evaluate the literature using AGREE II, AMSTAR, and QUADAS-2 for the included clinical practice guidelines, systematic reviews, and diagnostic tests, respectively.
3. Preliminary items pool development: Extract essential diagnostic and treatment procedures from the high-quality literature attained.
4. Clinical expert consensus: Apply a 2- to 3-round Delphi method to achieve consensus for diagnosis and treatment. The importance, necessity, and feasibility of the items should be considered in the process of Delphi, and additional medical information must be supplemented in terms of the clinical practice. Furthermore, all items should be classified as: necessary (3 points), selective (2 points), irrelevant (1 points), and erroneous (0 points).
5. Pilot and revise: Conduct a pilot test among 2~3 primary health care settings using the preliminary items. Revise the items and finalize the key diagnosis and treatment point evaluation items.

- 1
  - 2
  - 3
  - 4
  - 5
  - 6
  - 7
  - 8
  - 9
  - 10
  - 11
  - 12
  - 13
  - 14
  - 15
  - 16
  - 17
  - 18
  - 19
  - 20
  - 21
  - 22
  - 23
  - 24
  - 25
  - 26
  - 27
  - 28
  - 29
  - 30
  - 31
  - 32
  - 33
  - 34
  - 35
  - 36
  - 37
  - 38
  - 39
  - 40
  - 41
  - 42
  - 43
  - 44
  - 45
  - 46
  - 47
  - 48
  - 49
  - 50
  - 51
  - 52
  - 53
  - 54
  - 55
  - 56
  - 57
  - 58
  - 59
  - 60
6. Script development: Develop the script of the target disease based on key diagnosis and treatment point evaluation items before conducting the quality of service evaluation in primary health care institutions.

For peer review only

Appendix 3. Demonstrations of *Cure-Fun* smartphone-based platform current configurations of interview, physical exam and lab texts, and treatment.

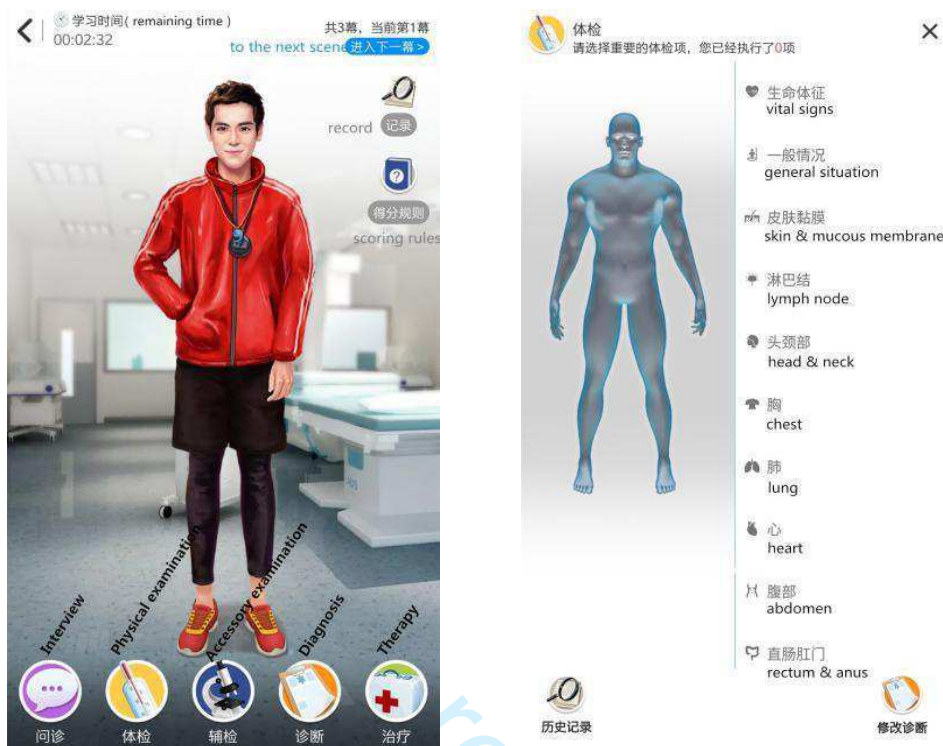



# BMJ Open

## Using smartphone-based virtual patients to assess the quality of primary health care in rural China: protocol for a prospective multicenter study

|                                 |                                                                                                                                                                                                                                                                                                                                                                                                                                                                                                                                                                                                                                                                                                                                                                                                                                                                                                                                                                                                                                                                                                                                                                                                                                                                                                                                                                                                                                                                                                                                                                                                                                                                                                                        |
|---------------------------------|------------------------------------------------------------------------------------------------------------------------------------------------------------------------------------------------------------------------------------------------------------------------------------------------------------------------------------------------------------------------------------------------------------------------------------------------------------------------------------------------------------------------------------------------------------------------------------------------------------------------------------------------------------------------------------------------------------------------------------------------------------------------------------------------------------------------------------------------------------------------------------------------------------------------------------------------------------------------------------------------------------------------------------------------------------------------------------------------------------------------------------------------------------------------------------------------------------------------------------------------------------------------------------------------------------------------------------------------------------------------------------------------------------------------------------------------------------------------------------------------------------------------------------------------------------------------------------------------------------------------------------------------------------------------------------------------------------------------|
| Journal:                        | <i>BMJ Open</i>                                                                                                                                                                                                                                                                                                                                                                                                                                                                                                                                                                                                                                                                                                                                                                                                                                                                                                                                                                                                                                                                                                                                                                                                                                                                                                                                                                                                                                                                                                                                                                                                                                                                                                        |
| Manuscript ID                   | bmjopen-2017-020943.R2                                                                                                                                                                                                                                                                                                                                                                                                                                                                                                                                                                                                                                                                                                                                                                                                                                                                                                                                                                                                                                                                                                                                                                                                                                                                                                                                                                                                                                                                                                                                                                                                                                                                                                 |
| Article Type:                   | Protocol                                                                                                                                                                                                                                                                                                                                                                                                                                                                                                                                                                                                                                                                                                                                                                                                                                                                                                                                                                                                                                                                                                                                                                                                                                                                                                                                                                                                                                                                                                                                                                                                                                                                                                               |
| Date Submitted by the Author:   | 16-May-2018                                                                                                                                                                                                                                                                                                                                                                                                                                                                                                                                                                                                                                                                                                                                                                                                                                                                                                                                                                                                                                                                                                                                                                                                                                                                                                                                                                                                                                                                                                                                                                                                                                                                                                            |
| Complete List of Authors:       | Liao, Jing; Sun Yat-sen University, Department of Epidemiology and Biostatistics, School of Public Health; Sun Yat-sen University, Sun Yat-sen Global Health Institute, Institute of State Governance<br>Chen, Yao-Long; Lanzhou University, Evidence-Based Medicine Center, School of Basic Medical Sciences<br>Cai, Yiyuan; Sun Yat-sen University, Department of Epidemiology and Biostatistics, School of Public Health; Guizhou Medical University, School of Public Health<br>Zhang, Nan; Inner Mongolia Medical University, Department of Health Management, School of Health Management<br>Sylvia, Sean ; University of North Carolina at Chapel Hill, Department of Health Policy and Management, Gillings School of Global Public Health<br>Hanson, Kara; London School of Hygiene & Tropical Medicine<br>Wang, Hong; Bill & Melinda Gates Foundation, Health Economics, Financing & Systems<br>Wasserheit, Judith; University of Washington, Departments of Global Health, Medicine, and Epidemiology, Schools of Medicine and Public Health<br>Gong, Wenjie; Central South University, School of Public Health; University of Rochester Medical Center, Department of Psychi<br>Zhou, Zhongliang; Xi'an Jiaotong University,<br>Pan, Jay; Sichuan University, West China School of Public Health<br>Wang, Xioahui; Lanzhou University, School of Public Health<br>Tang, Chengxiang; Guangzhou University, School of Public Administration<br>Zhou, Wei; Xiangya Hospital Central South University,<br>Xu, Dong; Sun Yat-sen University , Sun Yat-sen Global Health Institute, Institute of State Governance; Sun Yat-sen University, Department of Epidemiology and Biostatistics, School of Public Health |
| <b>Primary Subject Heading</b>: | Public health                                                                                                                                                                                                                                                                                                                                                                                                                                                                                                                                                                                                                                                                                                                                                                                                                                                                                                                                                                                                                                                                                                                                                                                                                                                                                                                                                                                                                                                                                                                                                                                                                                                                                                          |
| Secondary Subject Heading:      | Public health                                                                                                                                                                                                                                                                                                                                                                                                                                                                                                                                                                                                                                                                                                                                                                                                                                                                                                                                                                                                                                                                                                                                                                                                                                                                                                                                                                                                                                                                                                                                                                                                                                                                                                          |
| Keywords:                       | Quality in health care < HEALTH SERVICES ADMINISTRATION & MANAGEMENT, PRIMARY CARE, care quality assessment tool                                                                                                                                                                                                                                                                                                                                                                                                                                                                                                                                                                                                                                                                                                                                                                                                                                                                                                                                                                                                                                                                                                                                                                                                                                                                                                                                                                                                                                                                                                                                                                                                       |
|                                 |                                                                                                                                                                                                                                                                                                                                                                                                                                                                                                                                                                                                                                                                                                                                                                                                                                                                                                                                                                                                                                                                                                                                                                                                                                                                                                                                                                                                                                                                                                                                                                                                                                                                                                                        |

1  
2  
3  
4  
5  
6  
7  
8  
9  
10  
11  
12  
13  
14  
15  
16  
17  
18  
19  
20  
21  
22  
23  
24  
25  
26  
27  
28  
29  
30  
31  
32  
33  
34  
35  
36  
37  
38  
39  
40  
41  
42  
43  
44  
45  
46  
47  
48  
49  
50  
51  
52  
53  
54  
55  
56  
57  
58  
59  
60

SCHOLARONE™  
Manuscripts

For peer review only

Using smartphone-based virtual patients to assess the quality of primary health care in rural China: protocol for a prospective multicenter study

Jing Liao<sup>1,2</sup>, Yaolong Chen<sup>3</sup>, Yiyuan Cai<sup>4</sup>, Nan Zhan<sup>5</sup>, Sean Sylvia<sup>6</sup>, Kara Hanson<sup>7</sup>, Hong Wang<sup>8</sup>, Judith N Wasserheit<sup>9</sup>, Wenjie Gong<sup>10</sup>, Zhongliang Zhou<sup>11</sup>, Jay Pan<sup>12</sup>, Xiaohui Wang<sup>13</sup>, Chenxiang Tang<sup>14</sup>, Wei Zhou<sup>15</sup>, Dong Xu<sup>1,2\*</sup>

<sup>1</sup> Department of Epidemiology and Biostatistics, School of Public Health, Sun Yat-sen University, No.74 Zhongshan 2nd Road, Guangzhou, P.R. China, 510080

<sup>2</sup> Sun Yat-sen Global Health Institute, Institute of State Governance, Sun Yat-sen University, No.135 Xingang West Road, P.R. China, 510275

<sup>3</sup> Evidence Based Medicine Center, School of Basic Medical Sciences, Lanzhou University, No. 199 Donggang West Rd, Lanzhou City, Gansu Province, 730000 China

<sup>4</sup> School of Public Health, Guizhou Medical University, UniverCity of Guan New Area, Guizhou, China, 550025

<sup>5</sup> Department of Health Management, School of Health Management, Inner Mongolia Medical University, Jinshan Development Zone, Hohhot, Inner Mongolia, P.R. China, 010110

<sup>6</sup> Department of Health Policy and Management, Gillings School of Global Public Health, University of North Carolina at Chapel Hill, CB#7411, Chapel Hill, NC 27599, USA

<sup>7</sup> Department of Global Health and Development, Faculty of Public Health and Policy, London School of Hygiene and Tropical Medicine, WC1H 9SH, London, United Kingdom

<sup>8</sup> Health Economics, Financing & Systems, PO Box 23350, Seattle WA, 98102, USA

<sup>9</sup> Departments of Global Health, Medicine, and Epidemiology, Schools of Medicine and Public Health, University of Washington, 1705 NE Pacific Street, Box 357965 Seattle, Washington, 98195-7965, United States

<sup>10</sup> Xiangya school of public health, Central South University, Xiangya school of public health, Central South University, China

<sup>11</sup> School of Public Policy and Administration, Xi'an Jiaotong University, No. 28 Xianning West Road, Xi'an, Shaanxi, 710049, China.

<sup>12</sup> West China School of Public Health, Sichuan University, No. 17, Ren Min Nan Road, Chengdu, China

<sup>13</sup> School of Public Health, Lanzhou University, Lanzhou, Gansu Province, P. R. China, 730000

<sup>14</sup> School of Public Administration, Guangzhou University, Guangzhou, Guangdong, 510320, China.

<sup>15</sup> Hospital Administration Institute, Xinagya Hospital, Central South University, No. 87 Xiangya Road, Changsha, Hunan., China

Corresponding author\*: Dong Xu, [xudong5@mail.sysu.edu.cn](mailto:xudong5@mail.sysu.edu.cn), Department of Epidemiology and Biostatistics, School of Public Health, Sun Yat-sen University, No.74 Zhongshan 2nd Road, Guangzhou, P.R. China, 510080

## ABSTRACT

**Introduction:** Valid and low-cost quality assessment tools examining care quality are not readily available. The Unannounced Standardized Patient (USP), the gold standard for assessing quality, is costly to implement while the validity of clinical vignettes, as a low-cost alternative, has been challenged. Computerized virtual patients (VPs) create high-fidelity and interactive simulations of doctor-patient encounters which can be easily implemented via smartphone at low marginal cost. Our study aims to develop and validate smartphone-based VP as a quality assessment tool for primary care, compared to USP.

**Methods and analysis:** The study will be implemented in primary health centres (PHCs) in rural areas of seven Chinese provinces, and physicians practicing at township health centers and village clinics will be our study population. The development of VPs involves three steps: (1) identifying 10 VP cases that can best represent rural PHCs' work, (2) designing each case by a case-specific development team, and (3) developing corresponding quality scoring criteria. After being externally reviewed for content validity, these VP cases will be implemented on a smartphone-based platform and will be tested for feasibility and face validity. This smartphone-based VP tool will then be validated for its criterion validity against USP and its reliability (i.e., internal consistency and stability), with 1260 VP/USP-clinician encounters across the seven study provinces for all 10 VP cases.

**Ethics and dissemination:** Sun Yat-sen University: No. 2017-007. Study findings will be published and tools developed will be freely available to low- and middle-income

1  
2  
3 countries for research purposes.  
4  
5

6 Strengths and limitations of this study  
7

- 8 ● Developing and validating smartphone-based VP as a quality assessment tool  
9 for research and routine use in rural primary health care centers.
- 10 ● Following an evidence-based approach to develop VP cases and scoring  
11 criteria.
- 12 ● Systematically validating the VP assessment tool via a cross-national  
13 multicenter study
- 14 ● The extent to which the VP assessment will reflect practitioners' real clinical  
15 practice needs to be verified.  
16  
17

18  
19 **Key words:** Quality in health care, primary care, care quality assessment tool  
20  
21  
22  
23  
24  
25  
26  
27  
28  
29  
30  
31  
32  
33  
34  
35  
36  
37  
38  
39  
40  
41  
42  
43  
44  
45  
46  
47  
48  
49  
50  
51  
52  
53  
54  
55  
56  
57  
58  
59  
60

## INTRODUCTION

Universal health coverage (UHC) is a paramount goal of health system development for countries at all income levels.<sup>1</sup> The achievement of UHC is not possible without primary health care services,<sup>1</sup> which ensure integrated care close to the population they serve and link to the health-related sustainable development goals.<sup>2</sup> However, service coverage alone cannot improve health outcomes if the quality of care is poor. Despite efforts devoted to improving health care services, there is a lack of scientific evidence on the quality of primary health care in resource-poor settings, particularly of low- and middle- income countries (LMICs).<sup>3-6</sup>

This scarcity of evidence may partially result from the limited availability of valid, low cost, and easy-to-implement quality assessment tools<sup>7</sup>. As defined by Donabedian's framework, health care quality can be evaluated by the *structure* of care (e.g., staff, equipment), the *process* of care delivery (e.g., doctor-patient interactions), and health *outcomes* (e.g., death or complications).<sup>8</sup> Increasingly, process measures are being used, because of their advantages in terms of frequent and timely evaluation, and the usefulness in improving practice.<sup>9 10</sup> The 'gold standard' of assessing process is the unannounced standardized patient (USP), namely a trained actor who simulates the symptoms, signs, and emotions of a real patient in a standardized fashion and presents him- or herself unannounced to clinics to assess care quality.<sup>11</sup> USP can reduce recall bias better than patient exit interviews, minimize the Hawthorne effect that inevitably occurs in direct observation, and allow for comparisons between users as case- and patient-mix are controlled.<sup>3 9 11</sup> Nonetheless, the USP can only portray a

1  
2  
3 limited number of conditions without obvious physiological symptoms and risk of  
4  
5  
6  
7  
8  
9  
10  
11  
12  
13  
14  
15  
16  
17  
18  
19  
20  
21  
22  
23  
24  
25  
26  
27  
28  
29  
30  
31  
32  
33  
34  
35  
36  
37  
38  
39  
40  
41  
42  
43  
44  
45  
46  
47  
48  
49  
50  
51  
52  
53  
54  
55  
56  
57  
58  
59  
60

limited number of conditions without obvious physiological symptoms and risk of  
invasive examinations. Also, training and implementation of USP can require  
substantial personnel and resources, making USP impractical for large-scale and  
routine quality assessment.<sup>12 13</sup>

As an alternative, clinical vignettes or case simulations have been widely used  
as a low-cost and convenient method for assessing care quality.<sup>9 14</sup> Vignettes have  
been implemented in a paper-and-pencil form,<sup>9</sup> presented by an enumerator,<sup>5</sup> and  
streamlined by a computer.<sup>14</sup> Evidence of the validity of vignettes in assessing the  
quality of patient care is mixed. Some studies showed that vignettes reflect clinicians'  
competency (know-how) rather than their actual behaviors and can lead to  
overestimation of clinical performance.<sup>9 15</sup> By contrast, other studies found that  
vignette-based results, particularly those streamlined by computer, are quite close to  
the USP-based assessment.<sup>14 16</sup> The enumerator-administered vignette is similar to the  
announced standardized patient and thus is expensive and difficult to implement.<sup>5</sup> A  
computerized vignette can be interactive and can more realistically represent the  
complexity of a clinical encounter.<sup>14</sup> As a further improvement on computerized  
vignettes,<sup>14</sup> smartphone virtual patients (VPs) create high-fidelity, visualized, and  
interactive simulations that replicate clinical complexity and can be easily  
implemented at a low marginal cost.<sup>17</sup> Although VPs cannot remove the Hawthorne  
effect, their advanced features may reduce the measurement gap between competency  
and actual practice.<sup>10 14</sup> While VPs have been used in medical education to train and  
test clinical skills such as clinical reasoning, diagnosis and therapeutic decisions,<sup>18</sup>

1  
2  
3 their relative validity as a measure of quality of care has yet to be studied. Strengths  
4  
5 and limitations of the abovementioned three methods are compared in Table 1.  
6  
7

8  
9 In the present study, we propose to adapt smartphone-based VP for medical  
10  
11 education as a quality-of-care assessment tool, given its advantages in 1)  
12  
13 **standardization** (VPs are highly standardized, ensuring consistent assessments across  
14  
15 users), 2) **flexibility** (Assessments can be delivered by smartphones for multiple users  
16  
17 at any time, anywhere, providing data connectivity is available), 3) **scalability** (VPs  
18  
19 can be modified to demonstrate and assess almost any clinical conditions with low  
20  
21 marginal cost), and 4) **training** (VPs can also be used as a training tool to improve  
22  
23 health care quality and thus to address the ‘so what’ question after quality assessment).  
24  
25 These characteristics may especially benefit quality assessment and improvement in  
26  
27 rural primary care settings, where communities are geographically scattered and  
28  
29 difficult to reach and manage.  
30  
31  
32  
33  
34

35  
36 Therefore, our study aims to develop and validate **smartphone-based VPs**  
37  
38 against USPs as a quality assessment tool that can be used both for research purposes  
39  
40 and for routine evaluation of quality of primary health care provided by primary  
41  
42 health centers (PHCs) in rural areas. To maximize its validity,<sup>14</sup> we will systematically  
43  
44 construct high-fidelity VP cases to reflect clinical complexity in rural PHC contexts  
45  
46 with real-time patient-doctor interactions and temporal constraints, and use  
47  
48 evidence-based quality scoring criteria; additionally, we will make the VP-based test  
49  
50 anonymous to minimize the Hawthorne effect. The initial phase of the study will  
51  
52 mainly focus on rural China, while the ultimate goal is to develop and validate tools  
53  
54  
55  
56  
57



1  
2  
3 that can have a broad application in other LMICs.  
4

## 5 6 METHODS AND ANALYSIS 7

### 8 9 **Study setting**

10  
11 The validation study will be implemented in the outpatient setting of rural PHCs (i.e.,  
12 township health centers and village clinics) in seven Chinese provinces (Guizhou,  
13 Sichuan, Gansu, Inner Mongolia, Shaanxi, Hunan, and Guangdong). We are selecting  
14 these provinces not only to reflect the five strata of low-to-high life-expectancies and  
15 various burden-of-disease patterns in China,<sup>19</sup> but also to contrast geographic regions  
16 with diverse ethnic composition, including southwest mountainous regions, the  
17 northern plateau, the middle inland region, and southeast coastal areas (**Error!**  
18 **Reference source not found.**). Our study targets township health centers and village  
19 clinics because they provide the majority of primary health care in rural China.<sup>20 21</sup> At  
20 township health centers, primary health care is delivered by a workforce including  
21 licensed/unlicensed physicians, licensed/unlicensed assistant physicians, and  
22 registered nurses; while at village clinics, services are mainly delivered by one full- or  
23 part-time ‘village doctor’ who is a clinician with rudimentary medical training.<sup>20 22 23</sup>  
24  
25 The outpatient setting is chosen due to the small number of inpatient cases in  
26 township health centers and village clinics. Study recruitment is expected to start from  
27 June 2018.

### 28 29 **VP case development**

#### 30 31 *VP case selection*

32  
33 We intend to select 10 cases that together can represent the work of rural PHCs. The  
34  
35

1  
2  
3 selection of the VP cases will be based on the following criteria: 1) high frequency of  
4 clinical encounters in the primary care settings in rural areas, and/or 2) association with  
5 significant disease burden; 3) representation of the major areas of work of PHCs in  
6 rural China overall (e.g., public health service delivery, chronic disease management,  
7 infectious disease control, health education, and patient-centered care); and 4)  
8 suitability for the USP methodology (e.g., no obvious physiological signs, low risk for  
9 invasive tests) for the sake of criterion validation in the current study. A case selection  
10 committee will be comprised of a range of stakeholders, including physicians, public  
11 health practitioners, policy-makers, and members of the research team. Based on the  
12 literature review, the research team will prepare a shortlist of the 30 most frequently  
13 seen conditions in township health centers and village clinics reported by either  
14 community dwellers<sup>24</sup> or rural PHC clinicians (Appendix 1) from which the committee  
15 will select.

### 35 *VP case design*

36  
37 The 10 selected VP cases will then be constructed individually by 10 case-specific  
38 development teams (Figure 2). These teams consist of one *condition expert* from the  
39 relevant specialty of a tertiary teaching hospital who will be responsible for drafting  
40 the VP case; an *evidence-synthesis group* involving epidemiologists and  
41 evidence-based researchers who will search and synthesize evidence about the  
42 selected condition for the condition expert to work on; a *clinical consensus group*  
43 which consists of several condition-related clinical experts who will review the  
44 corresponding case from a scientific perspective; an overall all-condition shared

1  
2  
3  
4 *context-expert panel*, which includes clinicians and health managers from community  
5  
6 health centers, township health centers, and village clinics, who will review the  
7  
8 contextual appropriateness of the cases for the rural PHC setting; and a *case*  
9  
10 *coordinator* who will coordinate development of each case.  
11  
12

13 Each VP case will be structured into five domains—medical history, physical  
14  
15 examination, laboratory and imaging studies, diagnosis, and management and  
16  
17 treatment plan—to simulate real-life clinical scenarios.<sup>11 18</sup> The structured VP cases  
18  
19 will permit the examinee's performance in each domain to be evaluated, and for  
20  
21 performance scores to be aggregated across conditions. In addition to these five  
22  
23 condition-related domains, another practice contextual adjustment will be built into  
24  
25 each case to consider medical resource constraints in rural practices (e.g., availability  
26  
27 of basic medical equipment and medicines).  
28  
29  
30  
31

### 32 *Scoring criteria*

33  
34 Care quality scoring criteria will be developed for each VP case. These criteria  
35  
36 include *process quality*, the *accuracy of diagnosis*, and the *appropriateness of the*  
37  
38 *treatment and management plan*.<sup>3 4</sup> Process quality will be evaluated in reference to a  
39  
40 clinical process checklist (to be detailed later) including all necessary questions that  
41  
42 should be asked and physical examinations that should be performed by clinicians,  
43  
44 together with redundant or even potentially harmful practices. Diagnoses will be rated  
45  
46 as correct, partially correct, or incorrect based on predetermined standards. The  
47  
48 treatment and management plan will be considered appropriate if the clinician  
49  
50 prescribes any of the correct medications or refers the patient to a higher-level  
51  
52  
53  
54  
55  
56  
57  
58  
59  
60

1  
2  
3 physician depending on the VP case.  
4

5  
6 In addition, *cost of care* and *time-spent per encounter* will also be recorded.  
7  
8 Patient costs will cover medication fees and clinic fees charged per case. In order to  
9  
10 link clinician reaction time to each domain and to impose the temporal constraints  
11  
12 seen in real clinical practices, the entire clinician-VP interaction process will be timed.  
13  
14 This will include time spent on taking history, conducting physical examinations,  
15  
16 prescribing drugs and treatments, and any interruptions.  
17  
18

19  
20 A systematic evidence-based approach will be adopted to developing the scoring  
21  
22 checklist for the treatment and management plan, (Appendix 2). Briefly, the  
23  
24 evidence-synthesis group will systematically search and extract condition-specific  
25  
26 checklist items and standards from clinical guidelines, reputable textbooks, and  
27  
28 systematic reviews, etc., in that order. The quality of the evidence will then be rated  
29  
30 by the Appraisal of Guidelines for Research & Evaluation II (AGREE II)<sup>25</sup> or the  
31  
32 revised Quality Assessment of Diagnostic Accuracy Studies (QUADAS-2) according  
33  
34 to its type.<sup>26</sup> Afterwards, the clinical consensus group and the contextual-expert panel  
35  
36 will review and revise initial standards using a Delphi process.<sup>27</sup>  
37  
38  
39  
40  
41  
42

#### 43 **VP case external review**

44  
45 To validate the content of VP cases, an independent expert panel of physicians,  
46  
47 general practitioners, and rural PHC clinicians who otherwise are not involved in the  
48  
49 study, will be convened to review the cases for content accuracy and appropriateness.  
50  
51  
52 The content validation involves qualitative and quantitative phases. In the qualitative  
53  
54 phase, the expert panel will be required to evaluate the cases with respect to the  
55  
56  
57  
58  
59  
60

1  
2  
3 following: overarching assessment goal, representativeness of the goal and test items  
4  
5  
6 to each domain, the logical relationship of the content tested, and the appropriate  
7  
8 wording, grammar, understandability, and relevance to the rural PHC context. The  
9  
10 panel will also record their suggestions, if any, next to each item. Modified VP cases  
11  
12 will then be given back to the expert panel for quantitative evaluation. They will be  
13  
14 asked to assess the cases for simplicity and clarity, as well as necessity and relevance  
15  
16 to the assessment, using a four-point Likert scale ranging from 1 (the lowest) to 4 (the  
17  
18 highest). The content validity index (CVI) will be computed for each domain and for  
19  
20 the entirety of VP cases.<sup>28</sup>

### 25 **Technical implementation**

26  
27 Revised VP cases will be implemented on *CureFUN*, an existing smartphone-based  
28  
29 training platform using VPs with special customizations and set-up to suit the  
30  
31 assessment purpose. A live demonstration of a simplified VP can be accessed from  
32  
33 [http://www.curefun.com/zhiqu\\_front/www/experience/experience.html#/caseList](http://www.curefun.com/zhiqu_front/www/experience/experience.html#/caseList) and  
34  
35 is also illustrated in Appendix 3. The smartphone-based VP assessment tool will not  
36  
37 only present interactive clinical scenarios but will also automatically record each  
38  
39 examinee's diagnosis pathway and grade it against the scoring criteria (Figure 33).

### 45 **Feasibility study**

46  
47 Before a full-scale validation study, a feasibility study with 30% of the validation  
48  
49 study sample (see study sample section) will be conducted to test the VP assessment  
50  
51 tool's usability, accessibility, and stability, particularly in remote village clinics with  
52  
53 weak phone connectivity. Selected clinicians will be instructed to individually attempt  
54  
55

1  
2  
3 two random VP cases within a given time, using their own smartphone devices from  
4  
5 their workplace. Clinicians without a smartphone will be given a temporary device on  
6  
7 which the customized *CureFUN* applications will be pre-installed. Clinicians'  
8  
9 willingness to participate and adherence to the VP-based tests (e.g., percentage  
10  
11 completing VP cases, score of the assessment, and number of attempts made at each  
12  
13 case per person) will be automatically recorded. Upon completion of the cases,  
14  
15 participants will be asked to fill in a five-point Likert-scale questionnaire regarding  
16  
17 their subjective attitude toward the simulator VP experience (with 1 being the most  
18  
19 negative response and 5 being the most positive), regarding ease of use, their  
20  
21 experience of the assessment process and outcome, realism, device competence,  
22  
23 accessibility, and other general comments. These results will be used to determine the  
24  
25 face validity of the VP cases, with scores calculated by multiplying frequency (%) by  
26  
27 positive evaluations (3 to 5); and scores no less than 1.5 are considered acceptable.<sup>29</sup>  
28  
29  
30  
31  
32  
33  
34

### 35 **Validation of VP as a quality assessment tool**

#### 36 *Study design*

37  
38 The prospective validation study is a nationwide multicenter study with two main  
39  
40 purposes: 1) to assess the criterion validity of the VP-tool in assessing the quality of  
41  
42 primary health care, by analyzing its measurement concordance against the standard  
43  
44 USP measure, and 2) to test the reliability of the VP tool, by examining its internal  
45  
46 consistency and the stability of repeated VP assessments on the same subjects.  
47  
48  
49  
50  
51

#### 52 *Study sample*

53  
54 From each of our seven sample provinces, two counties will be selected with  
55  
56  
57

1  
2  
3 sufficient variations in socio-economic conditions, demographics, and disease burdens  
4  
5  
6 between them while also approximating the provincial condition in general. Within  
7  
8 each county, the government registry of all township health centers and village clinics  
9  
10 will serve as our sampling frame, which will include 1) licensed practicing physicians,  
11  
12  
13 2) clinicians who have not been licensed but are providing clinical services under the  
14  
15 supervision of licensed physicians at township health centers, as well as 3) full- or  
16  
17 part-time village clinicians. Clinicians visiting on a temporary basis (often senior  
18  
19 clinicians sent by higher level medical institutions to support the development of  
20  
21 township health centers), nurses, and allied health workers without prescription  
22  
23 privileges will be excluded.  
24  
25  
26

27  
28 The sample size calculation is based on individual VP/USP-clinician encounter  
29  
30 and ensures sufficient power to detect variations at individual case level per county.  
31  
32 For village clinics, one VP/USP case will be examined at a time to minimize the  
33  
34 detection of USPs. Assuming a 5% type I error and 80% power, to determine whether  
35  
36 a moderate concordance correlation coefficient<sup>30</sup> of 0.90<sup>31</sup> between VP and USP  
37  
38 differs from zero, seven paired VP/USP-clinician encounters will be required for each  
39  
40 of the 10 cases per county. As a stratified sampling strategy will be deployed that first  
41  
42 samples townships and then villages from each township, sample size calculations  
43  
44 need to take into account the design effect. Assuming an intra-class correlation of 0.05  
45  
46 and 6 village clinics per township, then 9 paired VP/USP-clinician encounters is  
47  
48 needed. These nine paired VP/USP-clinician encounters will be assigned to 3  
49  
50 township health centers and 6 village clinics using probability proportional to size  
51  
52  
53  
54  
55  
56  
57

1  
2  
3 (PPS). These 9 paired VP/USP-clinician encounters will be assigned to township  
4 health centers and village clinics based on the ratio of the total number of clinicians at  
5 township health centers to the total number of village clinicians for each county.  
6  
7  
8  
9  
10  
11 There are 1260 VP/USP-clinician encounters across our seven study provinces for all  
12  
13 10 VP cases. Figure 4 shows the sampling process and study flow for one VP case  
14  
15 using Guizhou Province (Danzhai County) as an example.  
16

### 17 *Criterion validity*

18  
19  
20 Criterion validity<sup>32</sup> of the VP to assess quality of care will be evaluated primarily by  
21  
22 its measurement concordance against the USP measure as the recognized gold  
23  
24 standard<sup>33</sup> for assessing quality of care in practice. The USPs will be developed in a  
25  
26 related study, sharing the development teams for VP and a similar development  
27  
28 process. The method of fielding USPs in rural China will follow a similar approach to  
29  
30 those of the previous USP study in rural China.<sup>3</sup> Identical quality scoring criteria,  
31  
32 described above, will be applied to scores. Each selected clinician will first see a USP  
33  
34 (to avoid the practice effect due to the USP's unannounced feature), and then  
35  
36 complete a smartphone-based VP assessment of the same condition. The clinician to  
37  
38 be assessed will be randomly selected onsite by the USP from any on-duty clinicians  
39  
40 on the day of the USP visit to the sampled township health center and village clinics.  
41  
42  
43  
44  
45 This situation would especially apply to township health centers, as most village  
46  
47 clinics have only one clinician (note: Chinese patients normally see their primary care  
48  
49 clinicians as a walk-in patient and appointments are seldom needed). To record  
50  
51 USP-clinician interactions, USPs will complete checklists immediately after their visit,  
52  
53  
54  
55  
56  
57  
58  
59  
60



1  
2  
3 and retain their prescription and the fee charge slips provided by the clinician. A week  
4  
5 after the USP clinic visit, clinicians will be assigned a smartphone-based VP  
6  
7 assessment, which will consist of an initial demonstration VP case to allow the  
8  
9 clinician to familiarize themselves with how the system operates and then the test VP  
10  
11 case of the same USP condition. The VP-clinician interactions, drugs dispensed, and  
12  
13 fees charged will all be recorded automatically by the online assessment system.  
14  
15

16  
17  
18 The concordance of the two USP and VP assessments will then be analyzed by  
19  
20 Lin's concordance correlation coefficient ( $r_c$ )<sup>30</sup> for continuous *process quality* scores,  
21  
22 *fees charged* (yuan), and *time spent* (min), and the Kappa statistic<sup>34</sup> for dichotomous  
23  
24 *diagnoses* and *treatment & management* measures.  $r_c$  evaluates how close pairs of  
25  
26 observation fell on a 45° line (the perfect concordance line) through the origin in  
27  
28 addition to their correlation. Kappa measures agreement in assessment beyond what is  
29  
30 expected by chance alone. In addition, for continuous measures, a Bland-Altman plot  
31  
32 will also be used to visualize the concordance.<sup>35 36</sup> For dichotomous measures, we will  
33  
34 analyze their sensitivity (i.e., strength to detect correct diagnosis, treatment plan, etc.)  
35  
36 and specificity (i.e., strength to detect incorrect diagnosis, treatment plan, etc.) using  
37  
38 USP as the reference.  
39  
40  
41  
42  
43

#### 44 45 *Reliability*

46  
47 To establish *test-retest reliability*, clinicians previously being assessed by VPs will be  
48  
49 instructed to retake the same VP tests four weeks after their last assessment. The  
50  
51 second VP test is set one month later than the first to reduce the practice effect,<sup>37</sup>  
52  
53 assuming the clinician's general medical knowledge remains constant.<sup>32</sup> The  
54  
55  
56  
57

1  
2  
3 concordance of the two repeated tests indicates the stability of the VP assessment  
4  
5 tool.<sup>32</sup> Similar concordance measures (i.e.,  $r_c$  for continuous and Kappa for  
6  
7 dichotomous measures) as described above will be used. *Internal consistency*, the  
8  
9 intercorrelation of scores for process quality indicators, will be computed by  
10  
11 Cronbach's alpha coefficients ( $\alpha$ ),<sup>38</sup> with  $\alpha > 0.7$  representing acceptable reliability.<sup>39</sup>  
12  
13 Table 2 summarizes the validity, reliability, and feasibility measures that will be  
14  
15 examined in our study.  
16  
17  
18  
19

### 20 **Patient and public involvement**

21  
22 We will seek feedback from clinicians and patient representatives in the feasibility  
23  
24 study and use their feedback to refine the VP cases. Our USPs will be lay people  
25  
26 trained to portray patients and assess care quality based on their interactions with  
27  
28 clinicians. Our scoring criteria thus are also patient centered. Furthermore, all  
29  
30 participants will be acknowledged for their involvement in the study and will be  
31  
32 provided with a final summary report of the study outcomes and will have free access  
33  
34 to the VP training website. All published results will be publicly available.  
35  
36  
37  
38  
39

### 40 **ETHICS AND DISSEMINATION**

41  
42 The study has been approved by the Institutional Review Board of the School of  
43  
44 Public Health (IRB), Sun Yat-sen University (No. 2017-007). Informed consent will  
45  
46 be obtained from all clinicians participating in the VP tests. However, to reduce  
47  
48 participation bias due to self-selection,<sup>40</sup> our IRB has approved the implementation of  
49  
50 USP without prior informed consent from the individual participants, on the condition  
51  
52 that involved clinicians will be fully de-identified and all analyses will only be  
53  
54  
55  
56  
57  
58  
59  
60

1  
2  
3 conducted at the population level.<sup>40</sup> Study data will be securely stored and only  
4  
5 de-identified information will be used for analysis. We will seek to publish study  
6  
7 findings in peer-reviewed journals and produce reports to inform health authorities.  
8  
9  
10 The tools and technology developed in this study will be freely available to other  
11  
12 LMICs for research purposes.  
13

## 14 15 DISCUSSION

16  
17 To the best of our knowledge, this is the first study validating VP as a quality  
18  
19 assessment tool in rural primary health care centers. This study follows an  
20  
21 evidence-based approach to develop VP cases and scoring criteria, implements them  
22  
23 on a widely accessible platform (i.e., a smartphone), and systematically validates the  
24  
25 VP assessment tool via a cross-national multicenter study representing rural PHCs  
26  
27 over a wide range of geographic areas with distinct life expectancies and economic  
28  
29 development levels. The VP assessment tool's accessibility, flexibility and scalability  
30  
31 give it good potential to be easily adapted to other LMICs.  
32  
33  
34  
35  
36

37  
38 VP has mainly been used in medical education to train and test critical thinking<sup>18</sup>  
39  
40<sup>41 42</sup>, and until recently few studies have applied the method in a practice setting to  
41  
42 influence health provider behavior and improve care quality.<sup>43 44</sup> As an extension, we  
43  
44 propose to validate VP as a quality assessment tool delivered via widely accessible  
45  
46 smartphones. Nevertheless, it is to be noted that given its simulated nature, the  
47  
48 VP-test theoretically may never completely bridge the 'know-do' gap. The validation  
49  
50 study is thus essential to quantify the concordance/discordance between VP- and  
51  
52 USP-based quality assessments. Our study will generate firsthand empirical evidence  
53  
54  
55  
56  
57

1  
2  
3 contributing to the understanding of the ‘know-do gap’,<sup>5 45</sup> and shed light on  
4  
5  
6 circumstances that cannot be tested by USPs.  
7

8  
9 A limitation of the study, however, is that, in order to test the validity of VP  
10  
11 against USP as the reference standard, we restrict the selection of VP cases to those  
12  
13 that can be simulated by USP. This conservative first step will nevertheless allow us  
14  
15 to examine the extent to which VP can reflect care quality, and a follow-up study will  
16  
17 then explore the full potential of the VP in assessing quality of care. Further, the two  
18  
19 purposely-selected counties for each province may not represent the provincial  
20  
21 conditions entirely, although we will make every effort to consider provincial  
22  
23 representation when selecting counties. Third, while the validation study is  
24  
25 exclusively conducted on PHCs in rural China, the extent to which the VP assessment  
26  
27 tool can be transported to other LMICs remains to be evaluated. Nonetheless, by  
28  
29 implementing the study in a diverse set of Chinese provinces may improve the  
30  
31 generalizability of our study considering the comparable life expectancies of LMICs  
32  
33 and these provinces.  
34  
35  
36  
37  
38

#### 39 40 Author’s contributions

41  
42 All authors contributed to the conceptualization and design of the study. DX, JL, and  
43  
44 YYC conceived the initial study design, analytical methods, and composition of the  
45  
46 team. JL was responsible for the study concept, initial draft, and revisions. DX was  
47  
48 responsible for the study concept and revising the draft. YLC and XHW were  
49  
50 responsible for the development of the scoring criteria. SS, KH, HW, JNW, ZLZ, ZN,  
51  
52 WJG, JP, CXT and WZ provided critical review and revision to the study design. All  
53  
54  
55  
56  
57  
58  
59  
60

1  
2  
3 authors read and approved the final revision.  
4

#### 5 6 Funding

7  
8 The study is supported by the China Medical Board through its Health Policy and  
9  
10 Systems Sciences Open Competition grant ‘Quality in primary health care: using  
11  
12 unannounced standardized patients’ (grant No.: CMB16-260, XD, PI).  
13

#### 14 15 Acknowledgement

16  
17 The study will be led by the Sun Yat-sen Global Health Institute of Sun Yat-sen  
18  
19 University with a consortium of researchers from seven other Chinese universities,  
20  
21 including Central South University, Guangzhou University, Guizhou Medical  
22  
23 University, Inner Mongolia Medical University, Lanzhou University, Sichuan  
24  
25 University, and Xi’an Jiaotong University. We thank all the students from these  
26  
27 universities who have contributed to our project, especially Wenjun He who produced  
28  
29 Figure 1, Jianjian Wang who assisted with the evidence collection of the Scoring  
30  
31 Criteria, and Ash Harris who contributed to the VP computerization.  
32  
33  
34  
35  
36

#### 37 38 Competing interests

39  
40 The development of the VP assessment tool is a joint project of the Sun Yat-sen  
41  
42 University Global Health Institute (SGHI) (representing the seven universities in  
43  
44 China), and *CureFUN*. However, the VP cases will be independently developed and  
45  
46 the validation studies will be rigorously conducted by the research team from SGHI  
47  
48 and the seven universities, whereas *CureFun* will technically implement the cases on  
49  
50 smartphones and have no influence over the study design and analysis.  
51  
52  
53  
54  
55  
56  
57

## REFERENCES

1. Kieny MP, Evans DB. Universal health coverage. *East Mediterr Health J* 2013;19(4):305-6.
2. Transforming our world: the 2030 Agenda for Sustainable Development. : United Nations- Sustainable Development Knowledge Platform, 2015.
3. Sylvia S, Shi Y, Xue H, et al. Survey using incognito standardized patients shows poor quality care in China's rural clinics. *Health Policy and Planning* 2014;30(3):322-33.
4. Das J, Holla A, Das V, et al. In urban and rural India, a standardized patient study showed low levels of provider training and huge quality gaps. *Health Affairs* 2012;31(12):2774-84.
5. Das J, Hammer J, Leonard K. The quality of medical advice in low-income countries. *The Journal of Economic Perspectives* 2008;22(2):93-114.
6. Sylvia S, Xue H, Zhou C, et al. Tuberculosis detection and the challenges of integrated care in rural China: A cross-sectional standardized patient study. *PLoS Medicine* 2017;14(10):e1002405.
7. Hanefeld J, Powell-Jackson T, Balabanova D. Understanding and measuring quality of care: dealing with complexity. *Bulletin of the World Health Organization* 2017;95(5):368.
8. Donabedian A. Evaluating the quality of medical care. *The Milbank Quarterly* 2005;83(4):691-729.
9. Peabody JW, Luck J, Glassman P, et al. Comparison of vignettes,

1  
2  
3  
4 standardized patients, and chart abstraction: a prospective validation study of  
5  
6 3 methods for measuring quality. *JAMA* 2000;283(13):1715-22.

7  
8 10. Shah R, Edgar D, Evans BJ. Measuring clinical practice. *Ophthalmic and*  
9  
10  
11 *Physiological Optics* 2007;27(2):113-25.

12  
13 11. Glassman PA, Luck J, O'Gara EM, et al. Using standardized patients to  
14  
15 measure quality: evidence from the literature and a prospective study. *The*  
16  
17 *Joint Commission journal on quality improvement* 2000;26(11):644-53.

18  
19  
20 12. Collins J, Harden R. The Use of Real Patients, Simulated Patients and  
21  
22  
23 Simulators in Clinical Examinations Association for Medical Education in  
24  
25 Europe (AMEE) Guide, 2004.

26  
27  
28 13. Triola M, Feldman H, Kalet AL, et al. A randomized trial of teaching clinical  
29  
30 skills using virtual and live standardized patients. *Journal General Internal*  
31  
32 *Medicine* 2006;21(5):424-9.

33  
34  
35 14. Peabody JW, Luck J, Glassman P, et al. Measuring the quality of physician  
36  
37 practice by using clinical vignettes: a prospective validation study. *Annals of*  
38  
39 *Internal Medicine* 2004;141(10):771-80.

40  
41  
42 15. Shah R, Edgar DF, Evans BJ. A comparison of standardised patients,  
43  
44 record abstraction and clinical vignettes for the purpose of measuring clinical  
45  
46 practice. *Ophthalmic and Physiological Optics* 2010;30(3):209-24.

47  
48  
49 16. Dresselhaus TR, Peabody JW, Luck J, et al. An evaluation of vignettes for  
50  
51 predicting variation in the quality of preventive care. *Journal of general internal*  
52  
53 *medicine* 2004;19(10):1013-18.

- 1  
2  
3  
4 17. Ellaway R, Candler C, Greene P, et al. An architectural model for  
5  
6 MedBiquitous virtual patients. Baltimore: MedBiquitous, 2006.  
7
- 8  
9 18. Cook DA, Triola MM. Virtual patients: a critical literature review and  
10  
11 proposed next steps. *Med Educ* 2009;43(4):303-11. doi:  
12  
13 10.1111/j.1365-2923.2008.03286.x [published Online First: 2009/04/02]  
14  
15
- 16 19. Zhou M, Wang H, Zhu J, et al. Cause-specific mortality for 240 causes in  
17  
18 China during 1990–2013: a systematic subnational analysis for the Global  
19  
20 Burden of Disease Study 2013. *The Lancet* 2016;387(10015):251-72.  
21  
22
- 23 20. Babiarz KS, Miller G, Yi H, et al. China's new cooperative medical scheme  
24  
25 improved finances of township health centers but not the number of patients  
26  
27 served. *Health Affairs* 2012;31(5):1065-74.  
28  
29
- 30 21. Li X, Lu J, Hu S, et al. The primary health-care system in China. *The*  
31  
32 *Lancet* 2017;390(10112):2584-94.  
33  
34
- 35 22. Qian D, Pong RW, Yin A, et al. Determinants of health care demand in  
36  
37 poor, rural China: the case of Gansu Province. *Health Policy and Planning*  
38  
39 2009;24(5):324-34.  
40  
41
- 42 23. Yip WC, Wang H, Liu Y. Determinants of patient choice of medical provider:  
43  
44 a case study in rural China. *Health Policy and Planning* 1998;13(3):311-22.  
45  
46
- 47 24. An Analysis Report of National Health Services Survey in China. Beijing:  
48  
49 Center for Health Statistics and Information, NHFPC, 2013.  
50  
51
- 52 25. Brouwers MC, Kho ME, Browman GP, et al. AGREE II: advancing  
53  
54 guideline development, reporting and evaluation in health care. *Canadian*  
55  
56



1  
2  
3  
4  
5  
6  
7  
8  
9  
10  
11  
12  
13  
14  
15  
16  
17  
18  
19  
20  
21  
22  
23  
24  
25  
26  
27  
28  
29  
30  
31  
32  
33  
34  
35  
36  
37  
38  
39  
40  
41  
42  
43  
44  
45  
46  
47  
48  
49  
50  
51  
52  
53  
54  
55  
56  
57  
58  
59  
60

*Medical Association Journal* 2010;182(18):E839-E42.

26. Whiting PF, Rutjes AW, Westwood ME, et al. QUADAS-2: a revised tool for the quality assessment of diagnostic accuracy studies. *Annals of Internal Medicine* 2011;155(8):529-36.

27. Hsu CC, Sandford BA. The Delphi Technique: Making Sense Of Consensus. *Practical Assessment Research & Evaluation* 2007;26(10):289-304.

28. Zamanzadeh V, Ghahramanian A, Rassouli M, et al. Design and implementation content validity study: development of an instrument for measuring patient-centered communication. *Journal of Caring Sciences* 2015;4(2):165.

29. Lacasse Y, Godbout C, Series F. Health-related quality of life in obstructive sleep apnoea. *European Respiratory Journal* 2002;19(3):499-503.

30. Lawrence I, Lin K. A concordance correlation coefficient to evaluate reproducibility. *Biometrics* 1989:255-68.

31. McBride G. A proposal for strength-of-agreement criteria for Lin's concordance correlation coefficient. NIWA Client Report: HAM2005-062: Hamilton: National Institute of Water & Atmospheric Research, Ltd (NZ), 2005.

32. Kimberlin CL, Winetrstein AG. Validity and reliability of measurement instruments used in research. *American Journal of Health-System Pharmacy* 2008;65(23)

33. Rethans JJ, Gorter S, Bokken L, et al. Unannounced standardised patients

1  
2  
3 in real practice: a systematic literature review. *Medical Education*  
4  
5  
6 2007;41(6):537-49.

7  
8 34. Cohen J. A coefficient of agreement for nominal scales. *Educational and*  
9  
10  
11 *Psychological Measurement* 1960;20(1):37-46.

12  
13 35. Kwicien R, Koppshneider A, Blettner M. Concordance analysis: part 16  
14  
15 of a series on evaluation of scientific publications. *Deutsches Ärzteblatt*  
16  
17  
18 *International* 2011;108(30):515.

19  
20 36. Bland JM, Altman DG. Statistical methods for assessing agreement  
21  
22 between two methods of clinical measurement. *Lancet*  
23  
24  
25 1986;327(8476):307-10.

26  
27 37. McCabe D, Langer KG, Borod JC, et al. Practice Effects. In: Kreutzer JS,  
28  
29 DeLuca J, Caplan B, eds. *Encyclopedia of Clinical Neuropsychology*. New  
30  
31  
32 York: Springer 2011:1988-89.

33  
34 38. Cronbach LJ. Coefficient alpha and the internal structure of tests.  
35  
36  
37 *Psychometrika* 1951;16(3):297-334.

38  
39 39. DeVellis RF. *Scale development: Theory and applications*. Los Angeles:  
40  
41  
42 Sage 2012:109-10.

43  
44 40. Rhodes KV, Miller FG. *Simulated Patient Studies: An Ethical Analysis*.  
45  
46  
47 *Milbank Quarterly* 2012;90(4):706-24.

48  
49 41. Reliability of a virtual patient simulation as an assessment tool.

50  
51  
52 PHARMACOTHERAPY; 2017. WILEY 111 RIVER ST, HOBOKEN  
53  
54  
55 07030-5774, NJ USA.

1  
2  
3  
4 42. Urrestigundlach M, Tolks D, Kiessling C, et al. Do virtual patients prepare  
5  
6 medical students for the real world? Development and application of a  
7  
8 framework to compare a virtual patient collection with population data. *Bmc*  
9  
10  
11 *Medical Education* 2017;17(1):174.

12  
13 43. Blok AC, May CN, Sadasivam RS, et al. Virtual Patient Technology:  
14  
15 Engaging Primary Care in Quality Improvement Innovations. *Jmir Medical*  
16  
17 *Education* 2017;3(1):e3.

18  
19  
20 44. Mollica R, Lavelle J, Fors U, et al. Using the Virtual Patient to Improve the  
21  
22 Primary Care of Traumatized Refugees. *Journal of Medical Education*  
23  
24 2017;16(1)

25  
26  
27 45. Mohanan M, Vera-Hernández M, Das V, et al. The know-do gap in quality  
28  
29 of health care for childhood diarrhea and pneumonia in rural India. *JAMA*  
30  
31 *Pediatrics* 2015;169(4):349-57.  
32  
33  
34  
35  
36  
37  
38  
39  
40  
41  
42  
43  
44  
45  
46  
47  
48  
49  
50  
51  
52  
53  
54  
55  
56  
57  
58  
59  
60

1  
2  
3  
4  
5  
6  
7  
8  
9  
10  
11  
12  
13  
14  
15  
16  
17  
18  
19  
20  
21  
22  
23  
24  
25  
26  
27  
28  
29  
30  
31  
32  
33  
34  
35  
36  
37  
38  
39  
40  
41  
42  
43  
44  
45  
46  
47  
48  
49  
50  
51  
52  
53  
54  
55  
56  
57  
58  
59  
60

Figure 1. Seven sample provinces in China referencing countries of equivalent life expectancy in parentheses.

For peer review only

1  
2  
3 Figure 2. Virtual patient case development team role and responsibilities.  
4  
5  
6  
7  
8  
9  
10  
11  
12  
13  
14  
15  
16  
17  
18  
19  
20  
21  
22  
23  
24  
25  
26  
27  
28  
29  
30  
31  
32  
33  
34  
35  
36  
37  
38  
39  
40  
41  
42  
43  
44  
45  
46  
47  
48  
49  
50  
51  
52  
53  
54  
55  
56  
57  
58  
59  
60

For peer review only

1  
2  
3  
4  
5  
6  
7  
8  
9  
10  
11  
12  
13  
14  
15  
16  
17  
18  
19  
20  
21  
22  
23  
24  
25  
26  
27  
28  
29  
30  
31  
32  
33  
34  
35  
36  
37  
38  
39  
40  
41  
42  
43  
44  
45  
46  
47  
48  
49  
50  
51  
52  
53  
54  
55  
56  
57  
58  
59  
60

Figure 3. Main components of smartphone-based virtual patient program.

For peer review only

1  
2  
3  
4 Figure 4. Sampling and study process for one VP case in Danzhai County, Guizhou Province.  
5  
6  
7  
8  
9  
10  
11  
12  
13  
14  
15  
16  
17  
18  
19  
20  
21  
22  
23  
24  
25  
26  
27  
28  
29  
30  
31  
32  
33  
34  
35  
36  
37  
38  
39  
40  
41  
42  
43  
44  
45  
46  
47  
48  
49  
50  
51  
52  
53  
54  
55  
56  
57  
58  
59  
60

For peer review only

Table 1. Strengths and limitations of quality assessment measures.

| Process Measure of Quality             | Strengths                                                                                                                                                                                 | Limitations                                                                                                   | Assessment Level                                                                              |
|----------------------------------------|-------------------------------------------------------------------------------------------------------------------------------------------------------------------------------------------|---------------------------------------------------------------------------------------------------------------|-----------------------------------------------------------------------------------------------|
| Unannounced Standardized Patient (USP) | Standardized, controlling for case-mix and patient-mix;<br>Unannounced, no Hawthorne effect (if not be detected);<br>Reduced recall bias                                                  | Expensive<br>Limited medical conditions<br>First-visit bias<br>Selection bias if informed consent is required | <b>Action (Do)</b><br><b>Gold standard</b>                                                    |
| Clinical Vignettes                     | Cost-effective;<br>Suitable for large scale and cross-system comparison;<br>Covering all illnesses;<br>Accounting for case-mix and patient-mix.                                           | Hawthorne effect<br>Selection bias                                                                            | <b>Competence (Know how)</b><br><b>Over-estimating</b> care quality (best answers) or similar |
| Virtual Patients (VP)                  | Interactive<br>Real-time response & automatic record<br>Highly standardized<br>Scalability & low marginal cost<br>Efficient delivery: anytime, anywhere<br>Suitable for large scale study | Hawthorne effect<br>Selection bias<br>High cost in initial development                                        | <b>Performance (Show how)</b><br>?                                                            |



Table 2. Main validation domains of the study.

| Domain                  | Indicator                                                      | Data collection   |                                                                                                                                                                                                                                                       | Statistical analysis                                                                                                                                                                                                                                                                   |
|-------------------------|----------------------------------------------------------------|-------------------|-------------------------------------------------------------------------------------------------------------------------------------------------------------------------------------------------------------------------------------------------------|----------------------------------------------------------------------------------------------------------------------------------------------------------------------------------------------------------------------------------------------------------------------------------------|
|                         |                                                                | Phase             | Method                                                                                                                                                                                                                                                |                                                                                                                                                                                                                                                                                        |
| Content validity        | Content validity index (CVI)                                   | VP case review    | Evaluations by an expert panel after reviewing VP cases, measured by a 4-point Likert scale (1=lowest, 4=highest).                                                                                                                                    | CVI for VP case and for specific VP domain will be computed, where CVI = number of raters giving a rating of 3 or 4 divided by the total number of raters.                                                                                                                             |
| Feasibility             | Willingness to participate; Adherence rate                     | Feasibility study | The subsample of clinicians' interactions with the 2 VP cases will be recorded by the online assessment                                                                                                                                               | Willingness to participate = clinicians taking the VP tests divided by the percentage of clinician selected<br>Adherence rate = clinicians completed 2 VP cases divided by the percentage of clinicians taking VP tests                                                                |
|                         |                                                                |                   | Clinicians' subjective attitude toward the VP test experience measured by a 5-point Likert scale (1=most negative, 5=most positive).                                                                                                                  | Satisfying score for VP case and for specific aspects (e.g., usability, accessibility, etc.) will be computed, where satisfying score = frequency multiply by positive evaluations (3 to 5), and scores $\geq 1.5$ are considered acceptable.                                          |
| Face validity           | Satisfying score                                               |                   |                                                                                                                                                                                                                                                       |                                                                                                                                                                                                                                                                                        |
| Criterion validity      | Concordance correlation coefficient ( $r_c$ ); Kappa statistic | Validation study  | The same clinician receives a USP visit and a VP test for a matching condition. The USP-clinician interaction is evaluated by the USP using the checklist, including fees and time per visit; while VP-clinician interaction is graded by the system. | The concordance of VP-test scores against USP-test score (gold standard) or two-repeated VP-tests will be examined by $r_c$ for continuous process quality scores, fees charged (yuan), and time spent (min); and Kappa for dichotomous diagnoses and treatment & management measures. |
|                         |                                                                |                   | Repeat VP-tests on the same clinician in a month                                                                                                                                                                                                      |                                                                                                                                                                                                                                                                                        |
| Test-retest Reliability |                                                                |                   |                                                                                                                                                                                                                                                       |                                                                                                                                                                                                                                                                                        |
| Internal consistency    | Cronbach's alpha coefficient ( $\alpha$ )                      |                   | VP-test scores on a single occasion                                                                                                                                                                                                                   | Intercorrelation of scores for process quality indicators with alpha $> 0.7$ is acceptable.                                                                                                                                                                                            |

1  
2  
3  
4  
5  
6  
7  
8  
9  
10  
11  
12  
13  
14  
15  
16  
17  
18  
19  
20  
21  
22  
23  
24  
25  
26  
27  
28  
29  
30  
31  
32  
33  
34  
35  
36  
37  
38  
39  
40  
41  
42  
43  
44  
45  
46  
47  
48  
49  
50  
51  
52  
53  
54  
55  
56  
57  
58  
59  
60

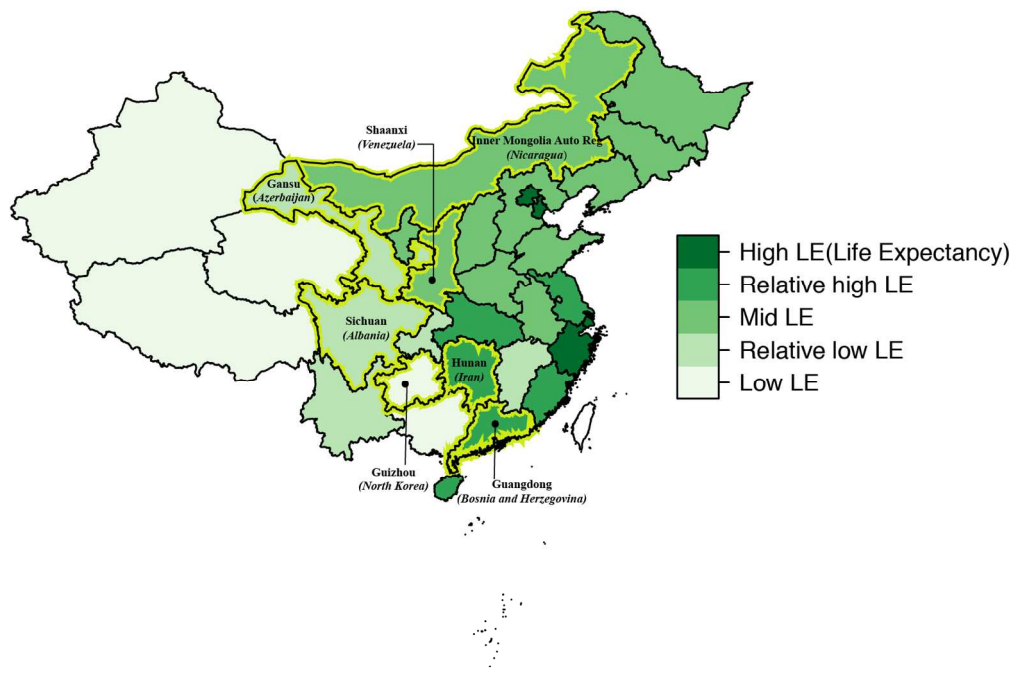

Figure 1. Seven sample provinces in China referencing countries of equivalent life expectancy in parentheses.

147x98mm (300 x 300 DPI)

view only

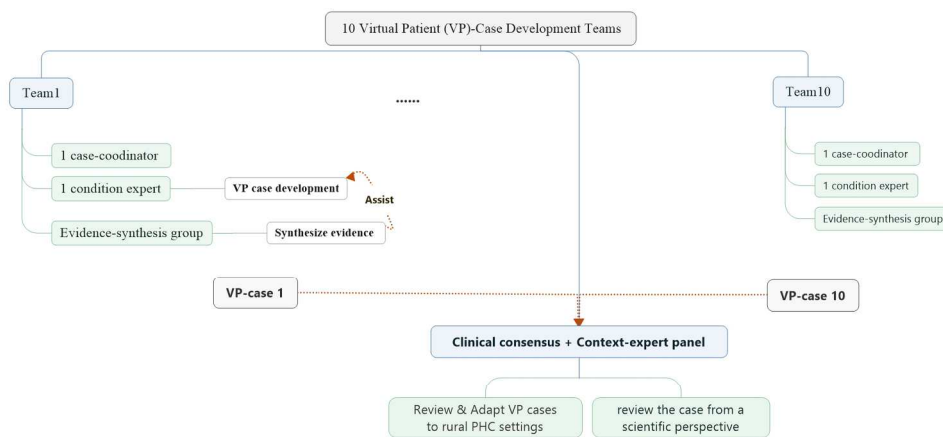

Figure 2. Virtual patient case development team role and responsibilities.

264x198mm (300 x 300 DPI)

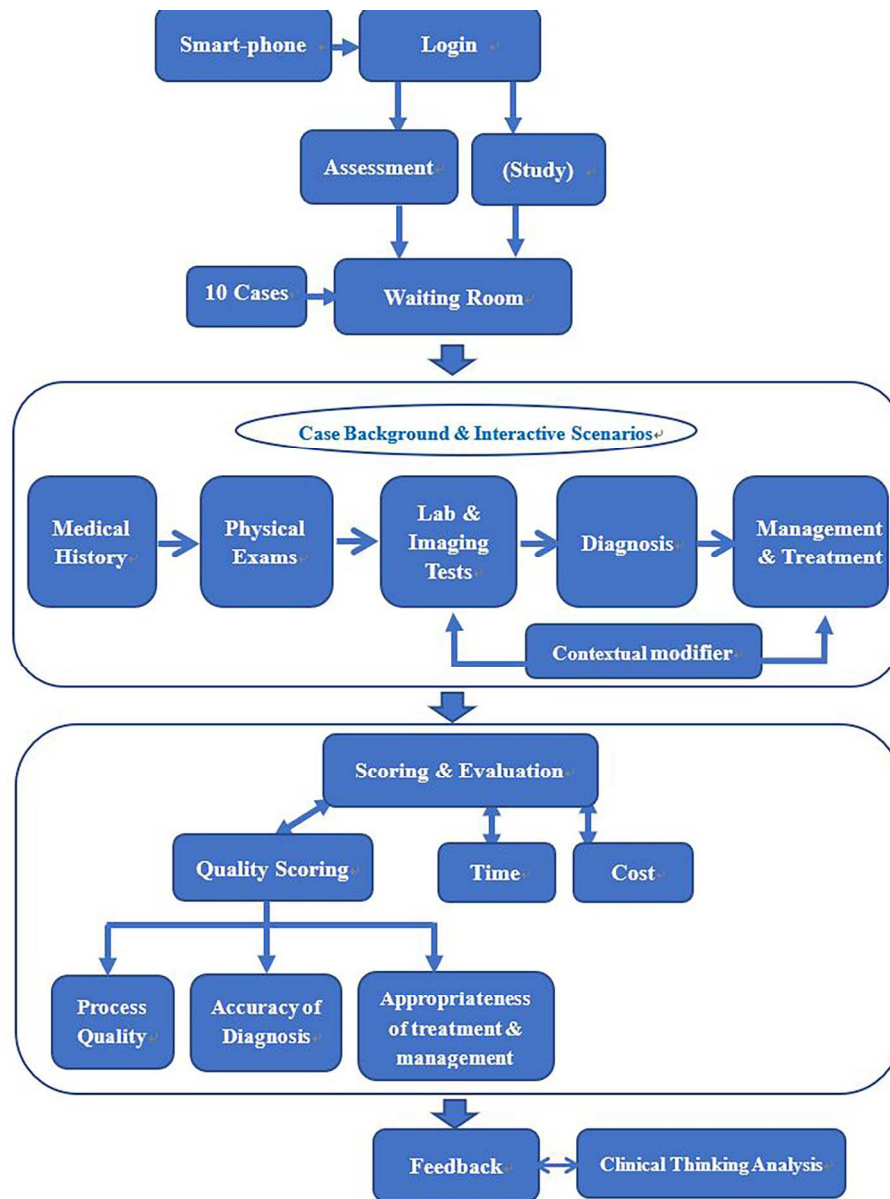

45 Figure 3. Main components of smartphone-based virtual patient program.

46 158x203mm (300 x 300 DPI)

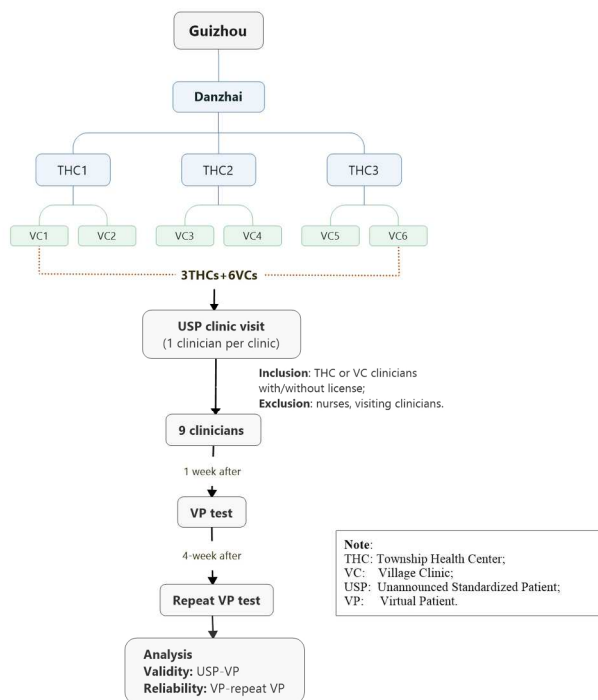

Figure 4. Sampling and study process for one VP case in Danzhai County, Guizhou Province.

264x198mm (300 x 300 DPI)

Appendix 1. Top 30 conditions of high-frequency clinical encounters in primary health care settings in rural China.

| Clinical condition          | Two-week consultation constituent ratio <sup>1</sup> |      | Township health center <sup>2</sup> |       | Village clinics <sup>2</sup> |       |
|-----------------------------|------------------------------------------------------|------|-------------------------------------|-------|------------------------------|-------|
|                             | RANK                                                 | %    | RANK                                | %     | RANK                         | %     |
| Cold                        | <b>1</b>                                             | 28   | <b>1</b>                            | 13.60 | <b>1</b>                     | 19.50 |
| Hypertension                | <b>2</b>                                             | 21.8 | <b>4</b>                            | 7.90  | <b>6</b>                     | 9.80  |
| Diabetes mellitus           | <b>4</b>                                             | 3.9  | <b>7</b>                            | 4.60  | <b>8</b>                     | 4.60  |
| Chronic tracheitis          | <b>8</b>                                             | 2    | <b>2</b>                            | 9.50  | <b>4</b>                     | 10.50 |
| Acute tracheitis            |                                                      |      | <b>3</b>                            | 9.00  | <b>3</b>                     | 10.70 |
| Gastritis                   | <b>3</b>                                             | 5.5  | <b>5</b>                            | 7.50  | <b>5</b>                     | 10.30 |
| Diarrhea                    |                                                      |      | <b>6</b>                            | 5.30  | <b>2</b>                     | 11.70 |
| Urinary tract infection     |                                                      |      | <b>8</b>                            | 4.50  | <b>9</b>                     | 2.90  |
| Osteoarthritis              | <b>7</b>                                             | 2.30 | <b>17</b>                           | 2.40  | <b>18</b>                    | 0.50  |
| Low back pain               | <b>5</b>                                             | 3.10 | <b>16</b>                           | 2.50  | <b>15</b>                    | 0.80  |
| Psoatic strain              |                                                      |      | <b>14</b>                           | 2.60  | <b>14</b>                    | 0.80  |
| Peptic ulcer                |                                                      |      | <b>11</b>                           | 2.90  | <b>11</b>                    | 1.70  |
| General trauma              |                                                      |      | <b>10</b>                           | 3.10  | <b>13</b>                    | 1.10  |
| Sciatica                    |                                                      |      | <b>19</b>                           | 1.80  | <b>22</b>                    | 0.30  |
| Child dyspepsia             |                                                      |      | <b>9</b>                            | 3.20  | <b>7</b>                     | 7.00  |
| Pelvic inflammatory disease |                                                      |      | <b>12</b>                           | 2.70  | <b>16</b>                    | 0.60  |
| Vaginitis                   |                                                      |      | <b>13</b>                           | 2.70  | <b>17</b>                    | 0.50  |
| Dysmenorrhoea               |                                                      |      | <b>18</b>                           | 2.30  | <b>19</b>                    | 0.50  |
| Cholecystitis               |                                                      |      | <b>15</b>                           | 2.60  | <b>12</b>                    | 1.60  |
| Toothache                   | <b>10</b>                                            | 1.30 | <b>22</b>                           | 1.30  | <b>10</b>                    | 2.70  |
| Menopausal syndrome         |                                                      |      | <b>21</b>                           | 1.40  | <b>27</b>                    | 0.10  |
| Cholelithiasis              |                                                      |      | <b>20</b>                           | 1.60  | <b>20</b>                    | 0.40  |
| Idiopathic headache         | <b>6</b>                                             | 2.50 | <b>25</b>                           | 0.60  | <b>25</b>                    | 0.20  |
| Hemorrhoids                 |                                                      |      | <b>23</b>                           | 1.10  | <b>21</b>                    | 0.40  |
| Asthma                      |                                                      |      | <b>28</b>                           | 0.60  | <b>26</b>                    | 0.20  |
| Chronic dermatitis          |                                                      |      | <b>29</b>                           | 0.20  | <b>29</b>                    | 0.10  |
| Tympanitis                  |                                                      |      | <b>24</b>                           | 0.70  | <b>24</b>                    | 0.20  |
| Conjunctivitis              |                                                      |      | <b>27</b>                           | 0.60  | <b>28</b>                    | 0.10  |
| Sinusitis                   |                                                      |      | <b>26</b>                           | 0.60  | <b>23</b>                    | 0.30  |
| Ischemic heart disease      | <b>9</b>                                             | 1.5  |                                     |       |                              |       |

<sup>1</sup> Self-reported two-week consultation constituent ratio by community dwellers, information from the 2013 National Health Service Survey in China.

<sup>2</sup> Clinicians reported common clinical conditions in primary health care centers by centers' type.

## Appendix 2. Methods for checklist and standards development

To evaluate the quality of care in primary health care institutions, key diagnosis and treatment points of common and frequently-occurring diseases will be developed. The *WHO Handbook for Guideline Development* and evidence-based evaluation principles will be adopted. The main procedures are comprised in the following six steps that will be implemented.

1. Expert group recruitment: Convene a multidisciplinary group consisting of experts in public health, evidence-based medicine/document retrieval, as well as clinical physicians.
2. Data retrieval and literature evaluation: Employ a 5S model to retrieve and incorporate clinical practice guidelines, textbooks, systematic reviews, meta-analysis, and important literature reviews. Retrieve literature from Wanfang, Medlive, MEDLINE, National Guideline Clearinghouse (NGC), National Institute for Health and Care Excellence (NICE), World Health Organization (WHO), DynaMed, and UpToDate. Evaluate the literature using AGREE II, AMSTAR, and QUADAS-2 for the included clinical practice guidelines, systematic reviews, and diagnostic tests, respectively.
3. Preliminary items pool development: Extract essential diagnostic and treatment procedures from the high-quality literature attained.
4. Clinical expert consensus: Apply a 2- to 3-round Delphi method to achieve consensus for diagnosis and treatment. The importance, necessity, and feasibility of the items should be considered in the process of Delphi, and additional medical information must be supplemented in terms of the clinical practice. Furthermore, all items should be classified as: necessary (3 points), selective (2 points), irrelevant (1 points), and erroneous (0 points).
5. Pilot and revise: Conduct a pilot test among 2~3 primary health care settings using the preliminary items. Revise the items and finalize the key diagnosis and treatment point evaluation items.

- 1
- 2
- 3 6. Script development: Develop the script of the target disease based on key
- 4 diagnosis and treatment point evaluation items before conducting the quality of
- 5 service evaluation in primary health care institutions.
- 6
- 7
- 8
- 9
- 10
- 11
- 12
- 13
- 14
- 15
- 16
- 17
- 18
- 19
- 20
- 21
- 22
- 23
- 24
- 25
- 26
- 27
- 28
- 29
- 30
- 31
- 32
- 33
- 34
- 35
- 36
- 37
- 38
- 39
- 40
- 41
- 42
- 43
- 44
- 45
- 46
- 47
- 48
- 49
- 50
- 51
- 52
- 53
- 54
- 55
- 56
- 57
- 58
- 59
- 60

For peer review only



Appendix 3. Demonstrations of *Cure-Fun* smartphone-based platform current configurations of interview, physical exam and lab texts, and treatment.

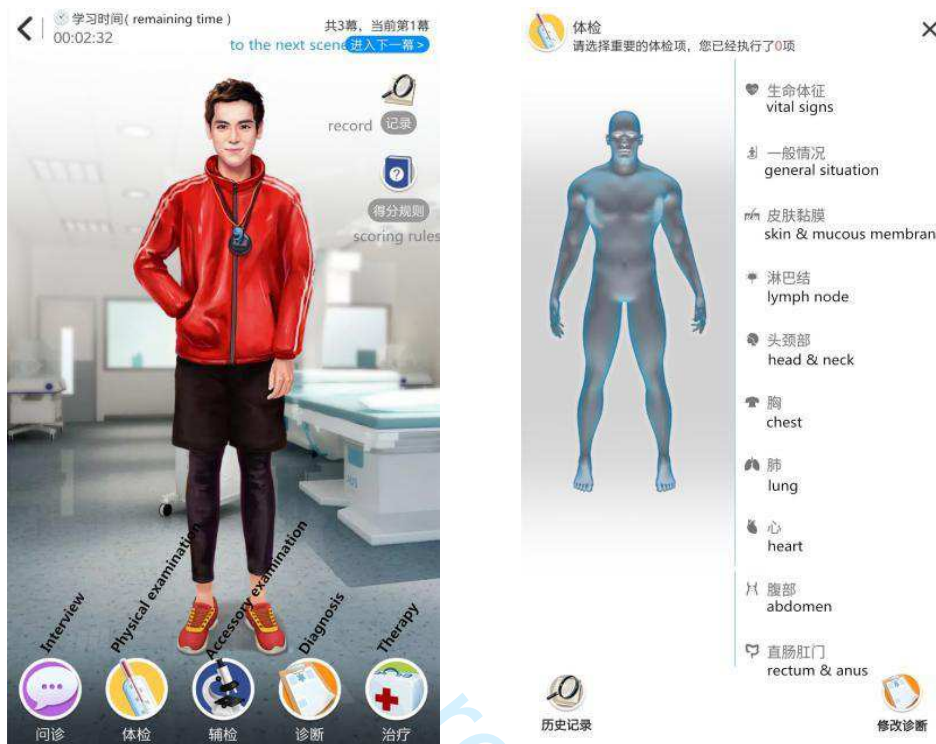

Supplement: bmjopen-2017-020943.draft_revisions.pdf [file bmjopen-2017-020943.draft_revisions.pdf]
